# Supplementary material for: High Levels of Sample-to-Sample Variation Confound Data Analysis for Non-Invasive Prenatal Screening of Fetal Microdeletions
Source: PubMed Central journal article supplement (PMC4889033; doi:10.1371/journal.pone.0153182), 2016-06-01

**Figure S1.**

Plasma control samples are designated with the prefix "PL".  
Chorionic villus control samples are designated with the prefix "CVS"

**PL1438**

**Loess Smoothing**

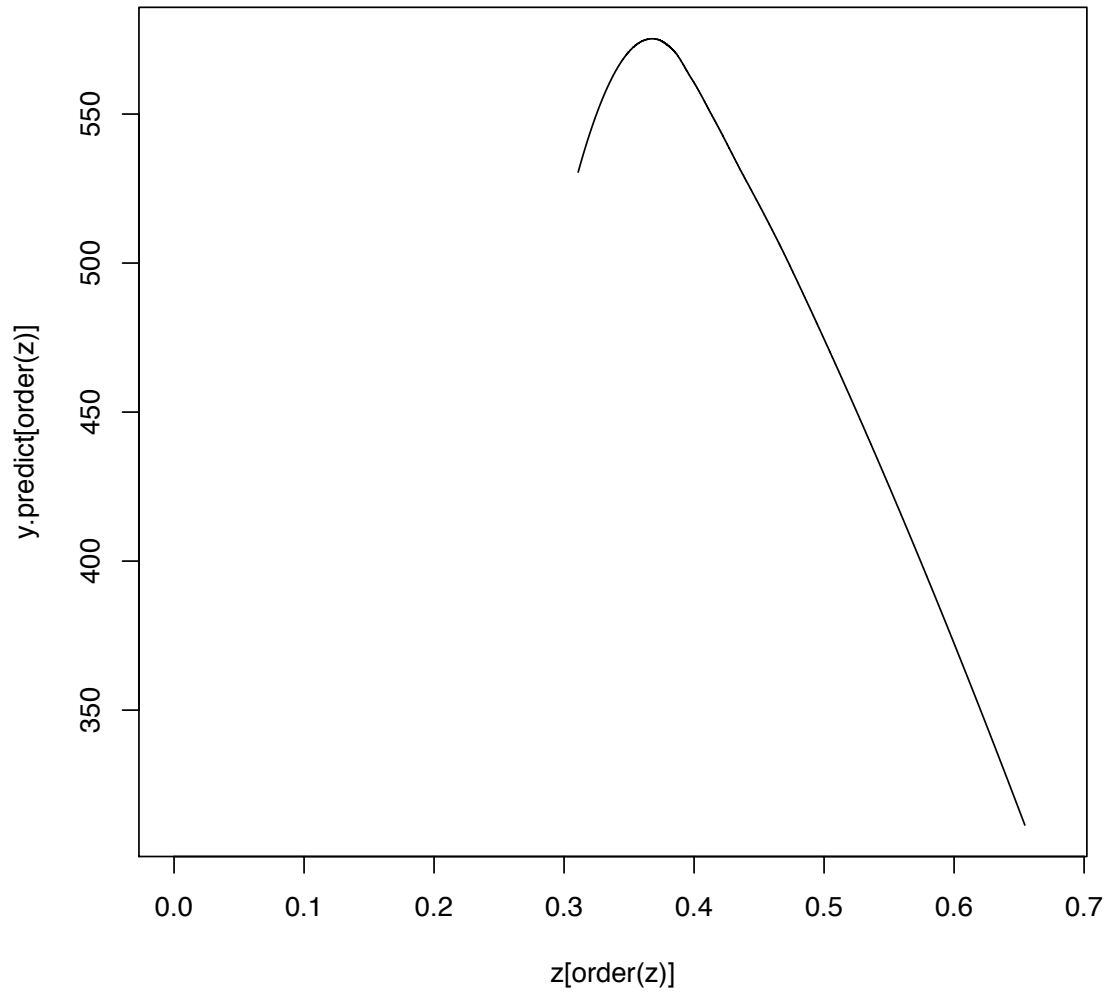

PL1421

### Loess Smoothing

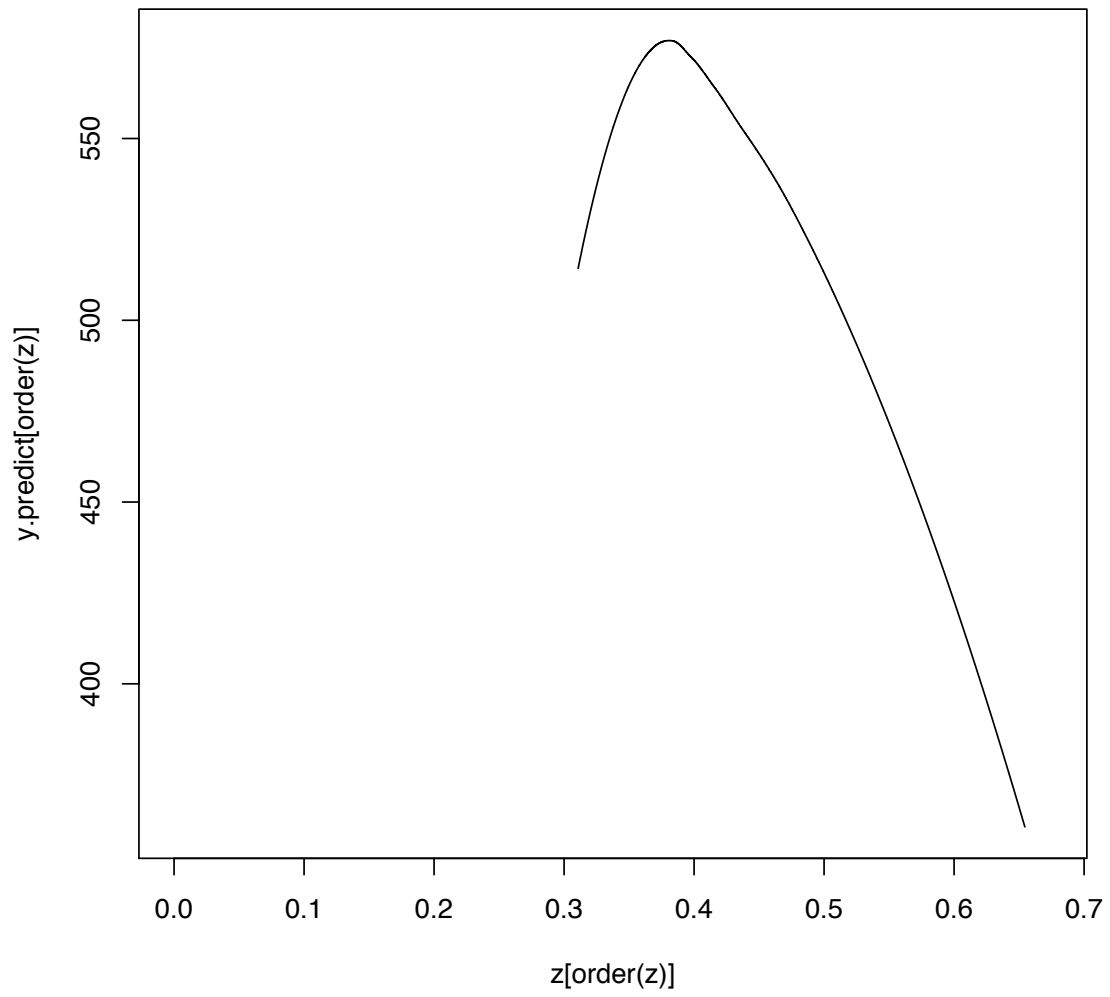

PL1411

### Loess Smoothing

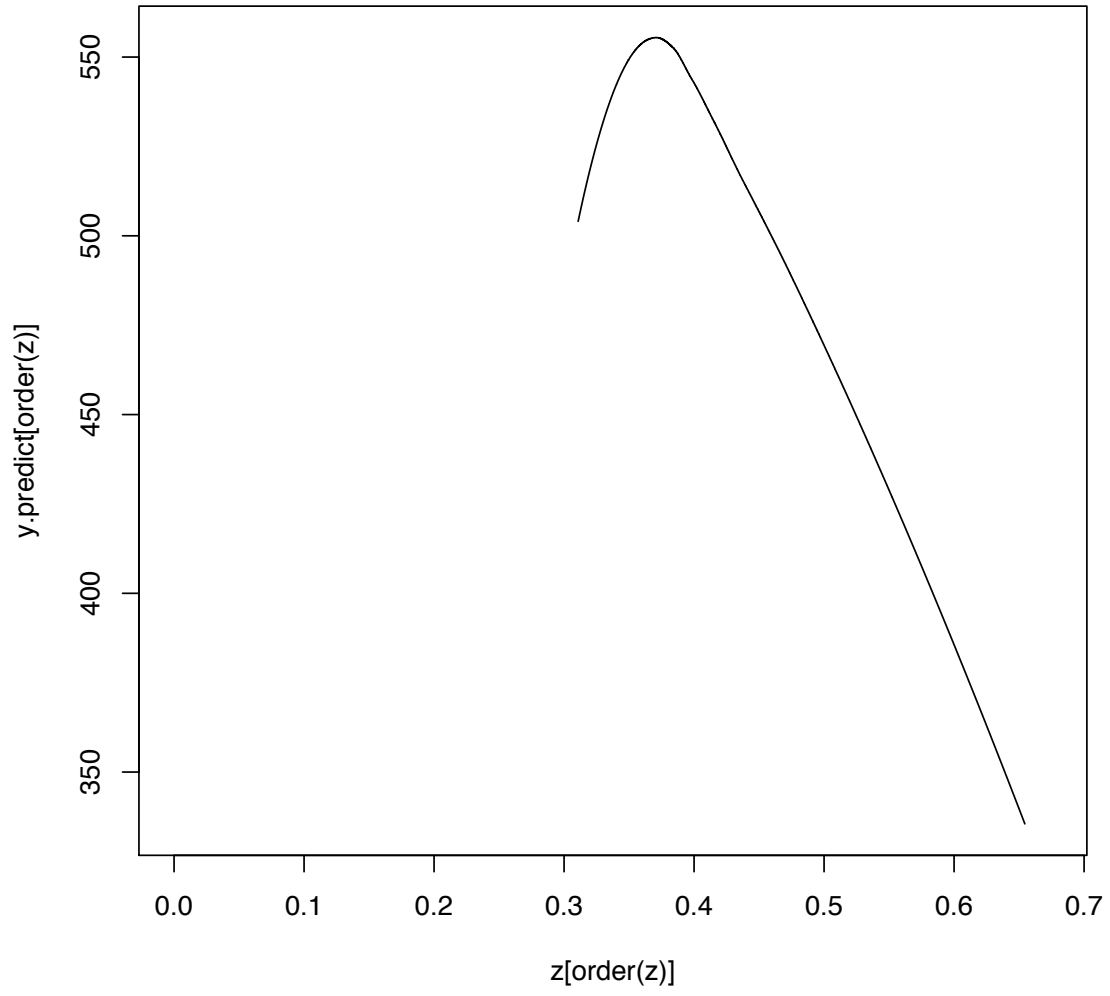

PL1405

### Loess Smoothing

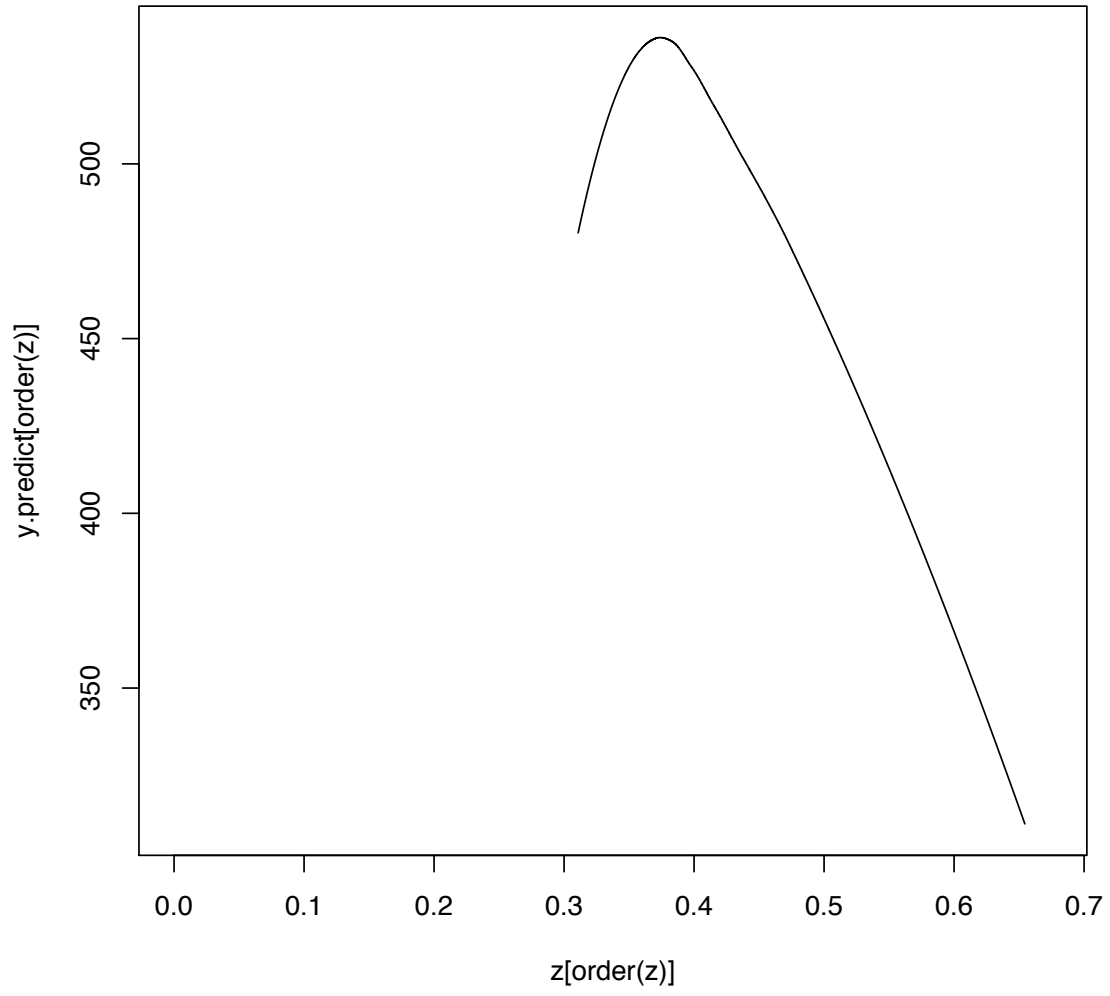

PL1390

### Loess Smoothing

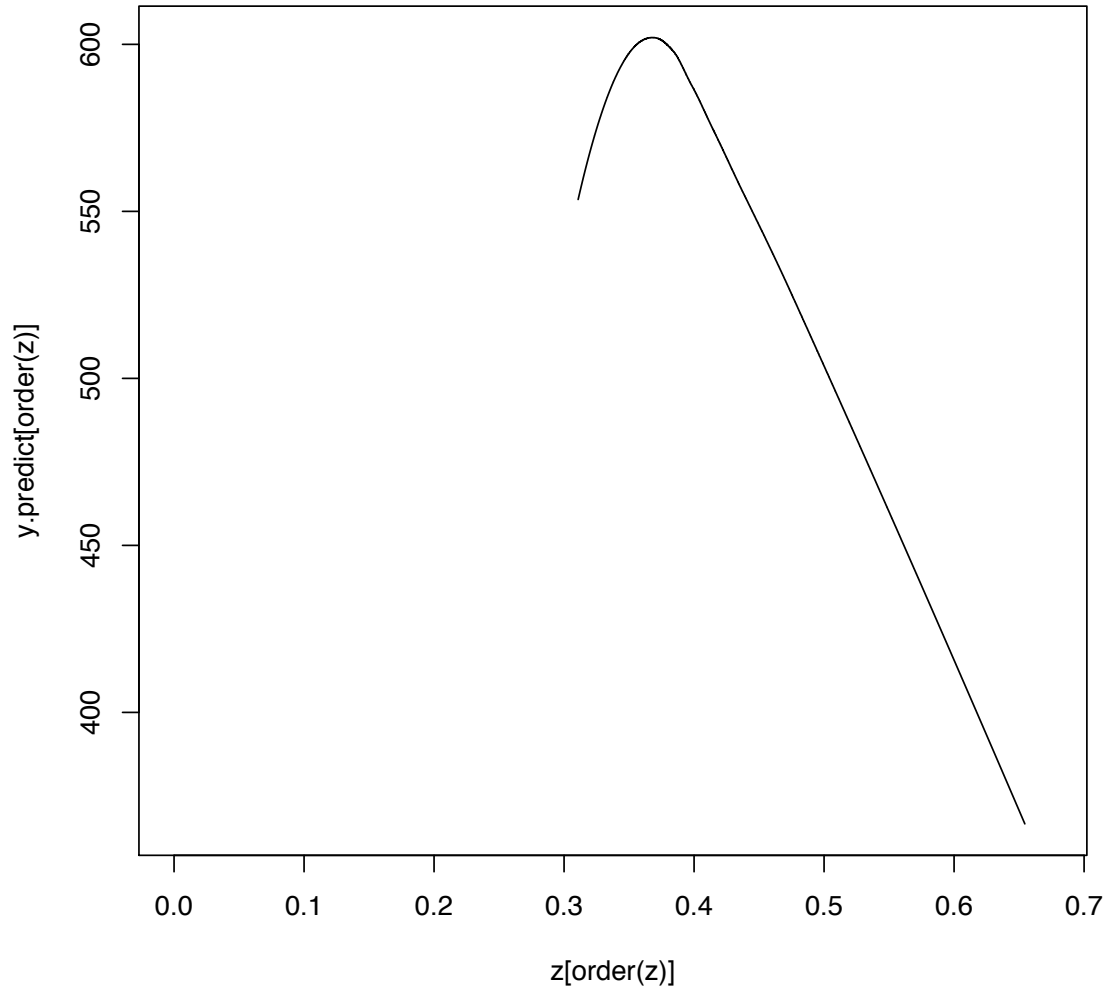

PL1388

### Loess Smoothing

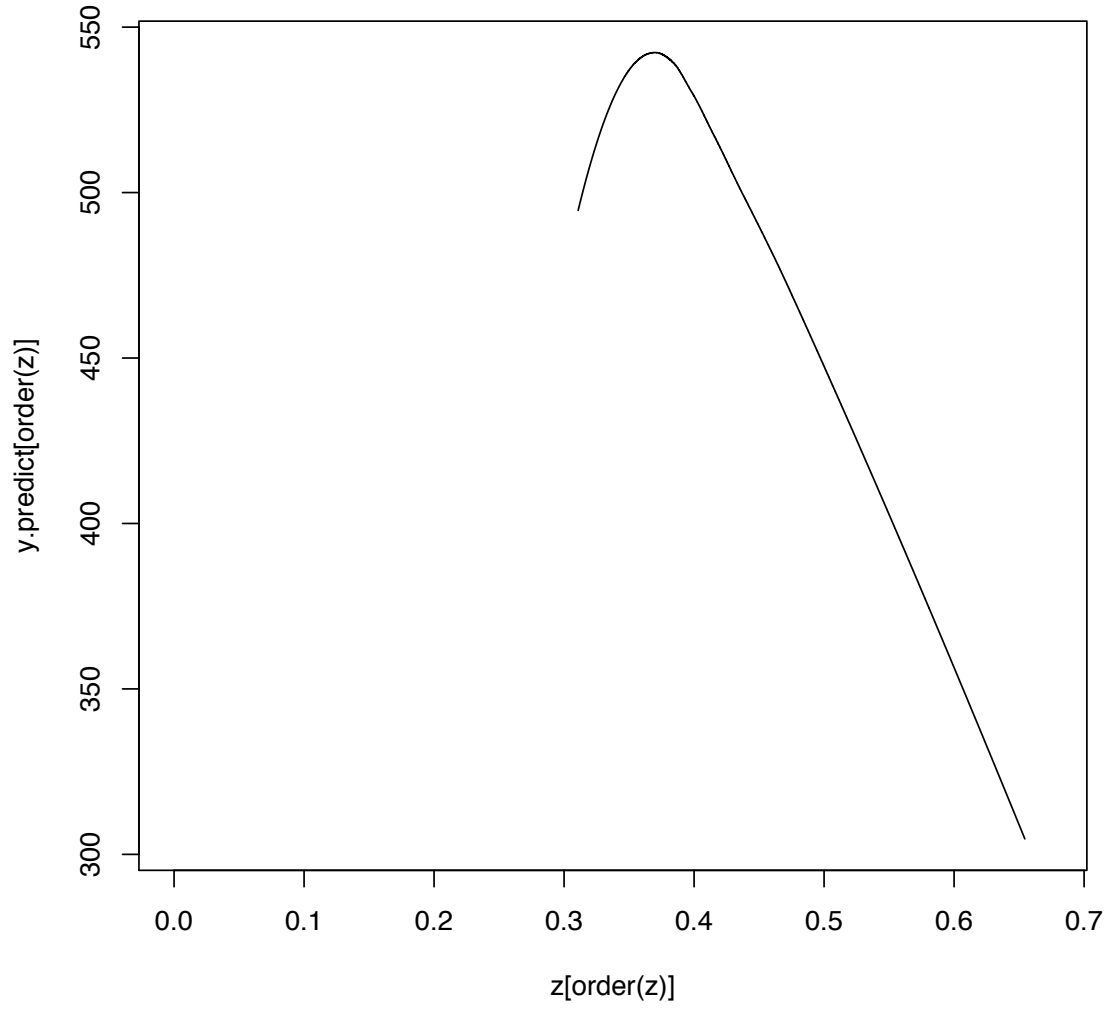

PL1351

### Loess Smoothing

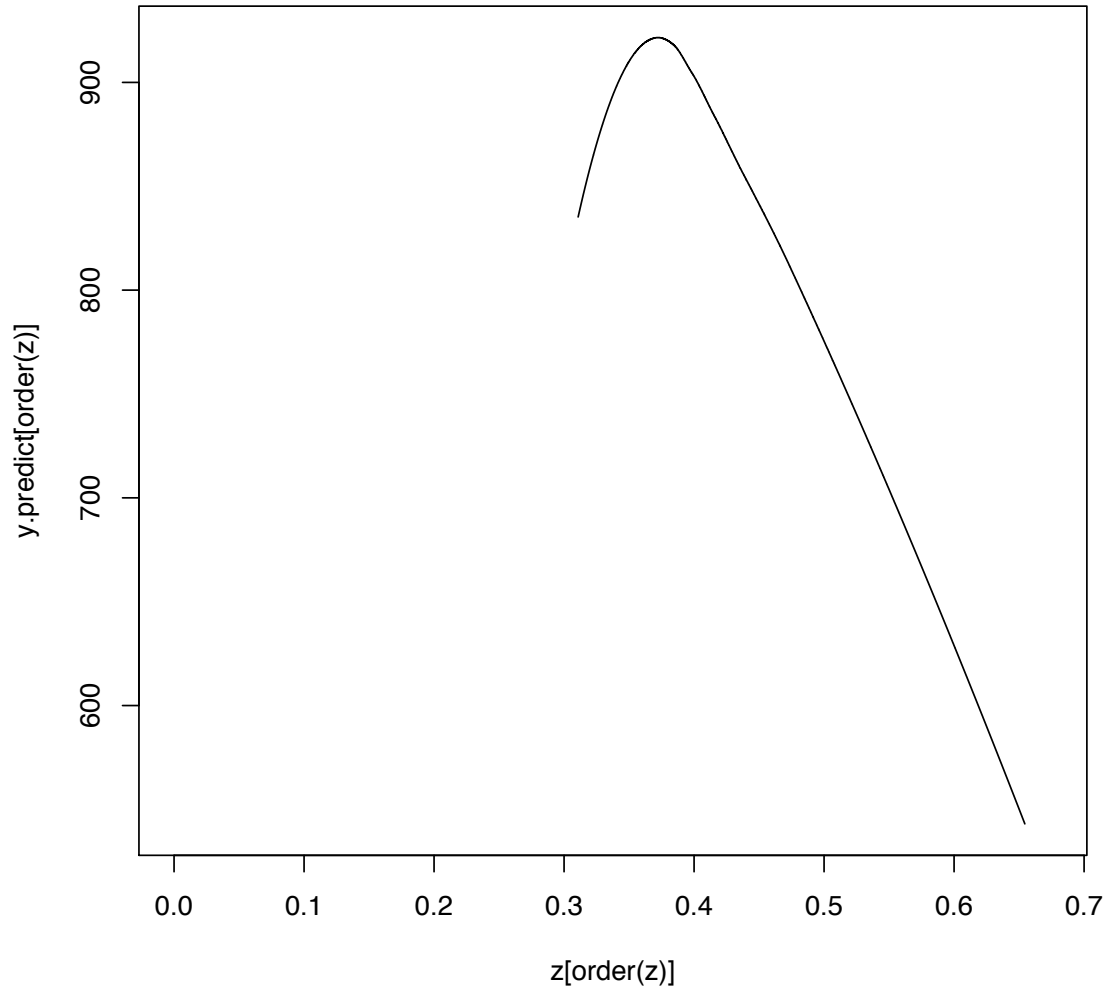

PL1307

### Loess Smoothing

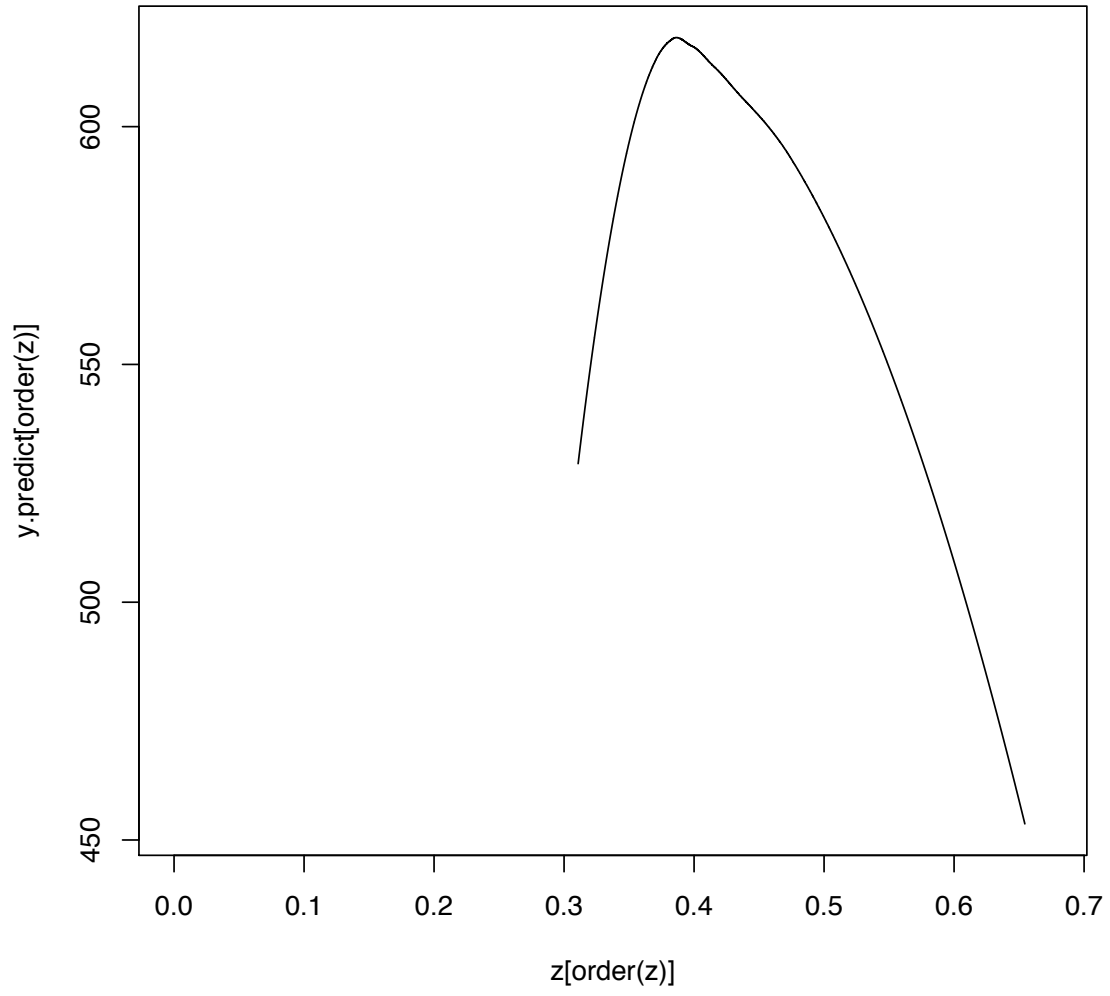



PL1303

### Loess Smoothing

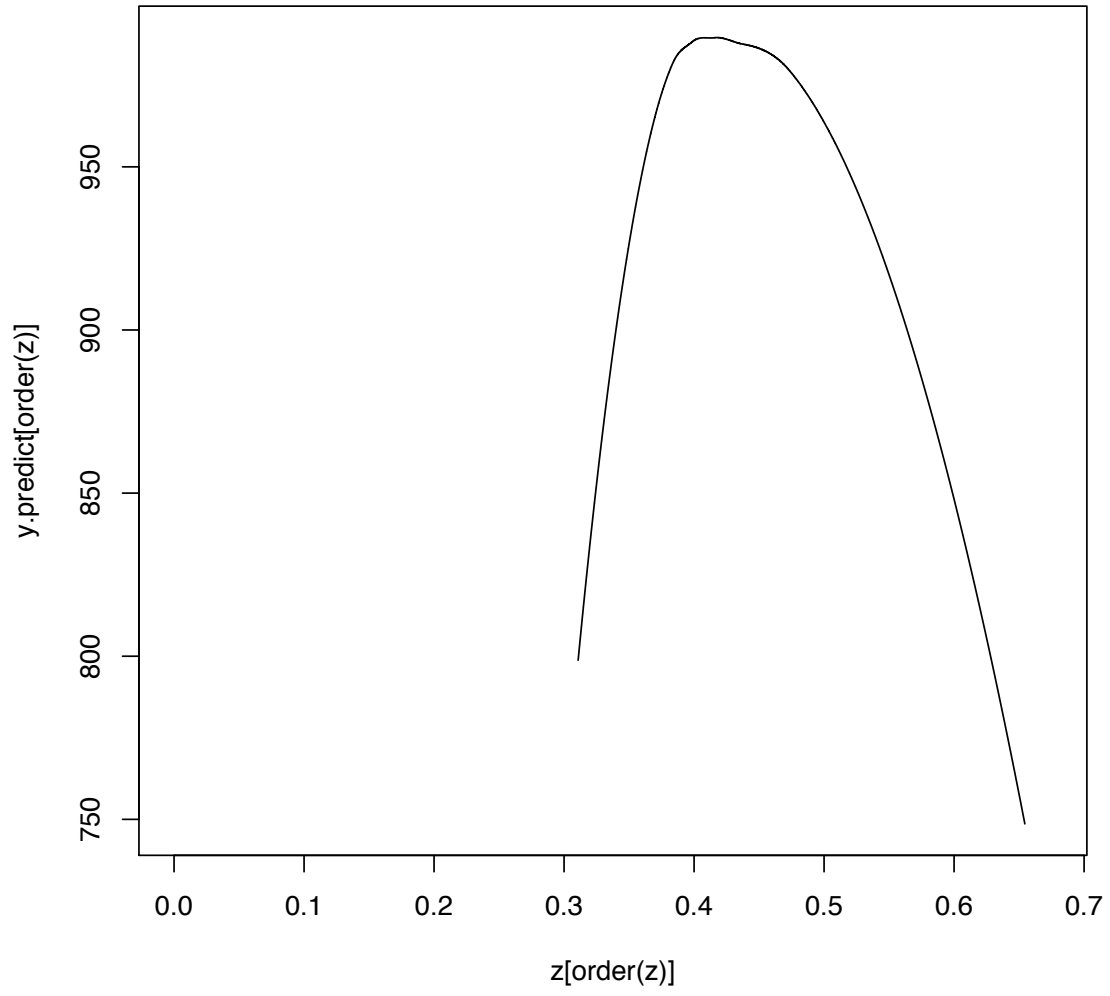

PL1268

### Loess Smoothing

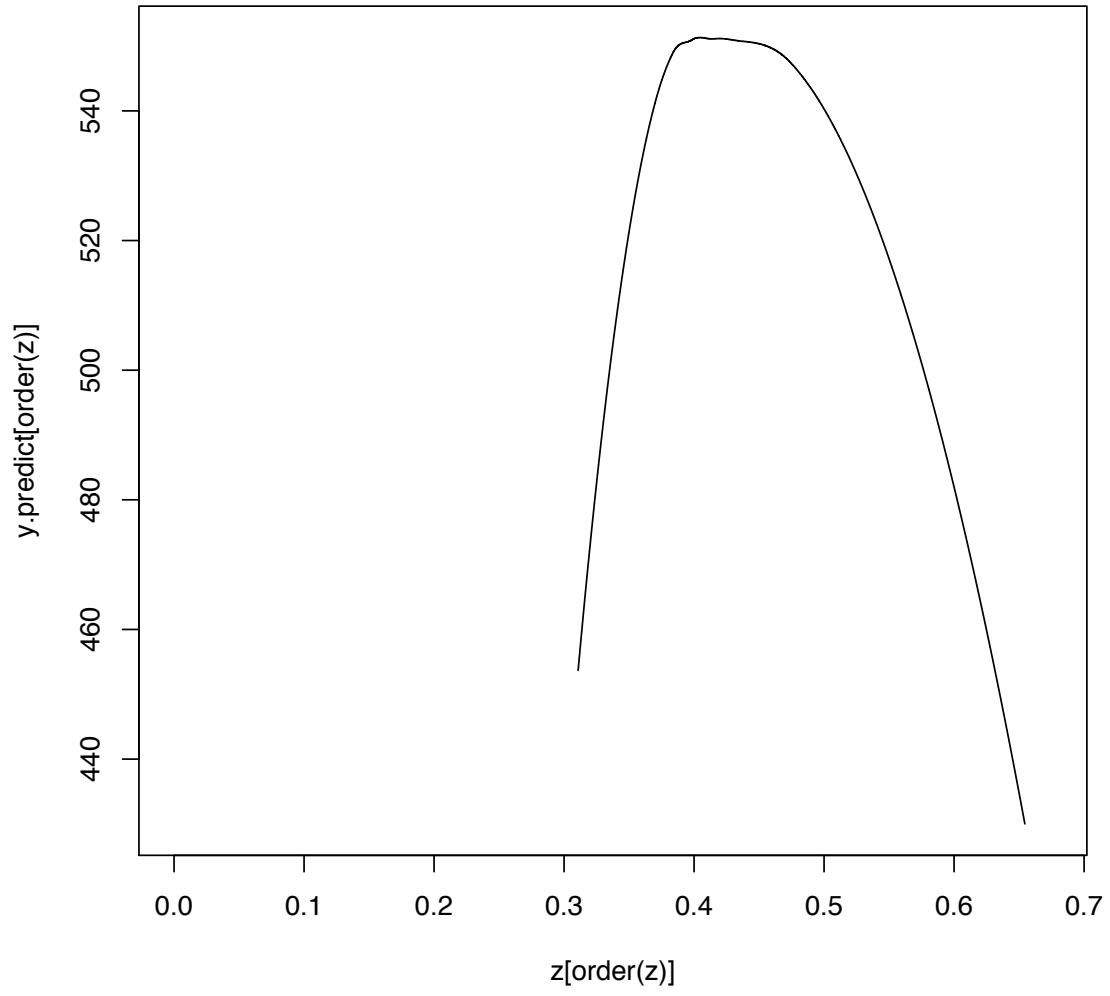

PL1265

### Loess Smoothing

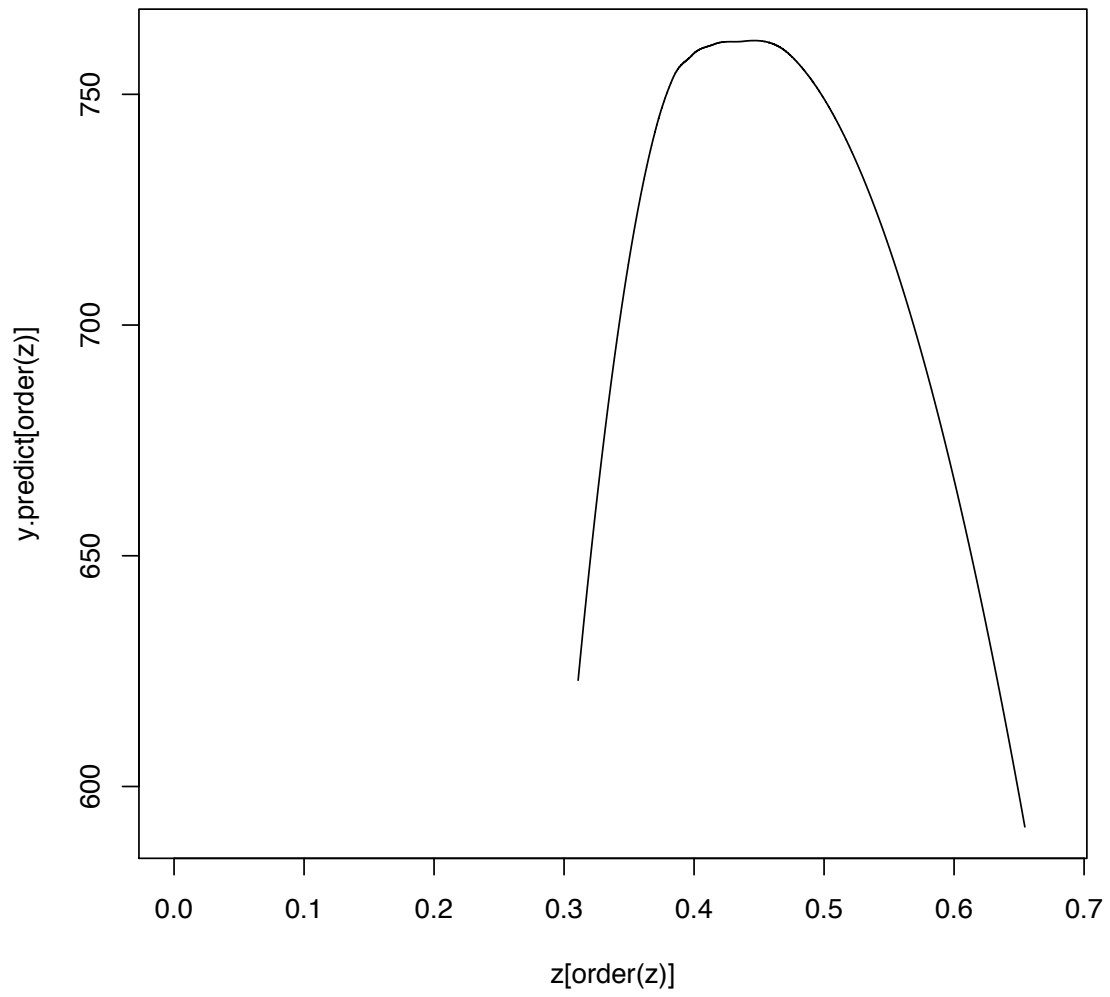

PL1236

### Loess Smoothing

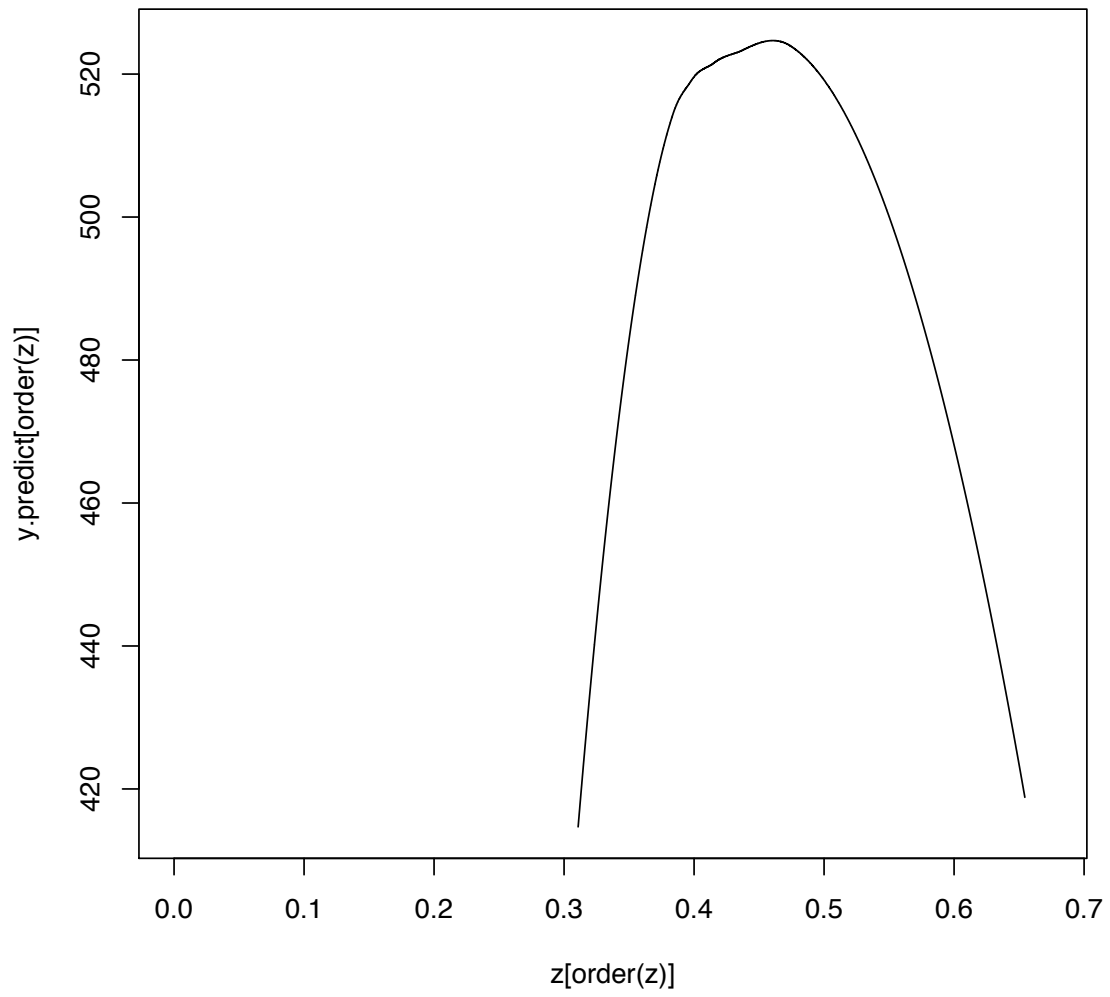

PL1157

### Loess Smoothing

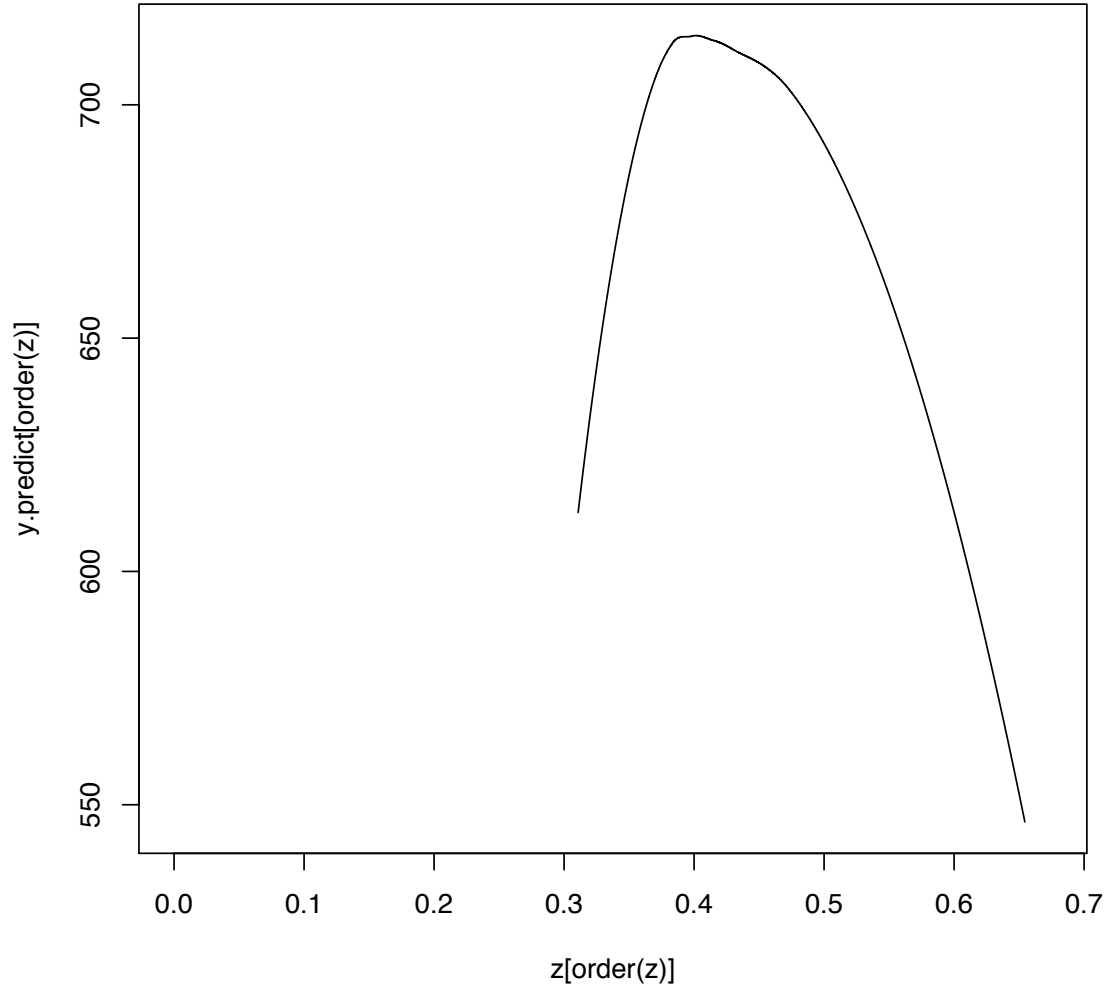

PL1139

### Loess Smoothing

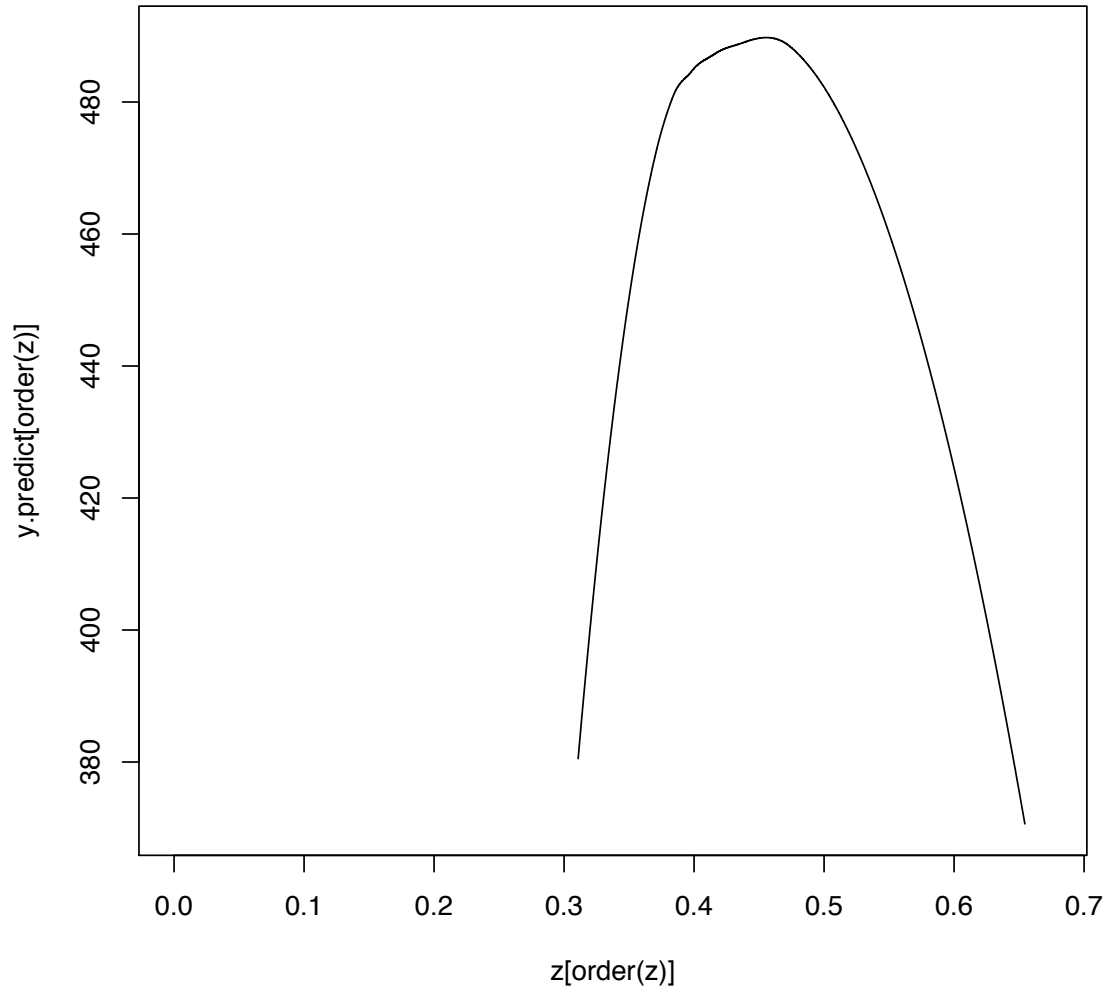

### Loess Smoothing

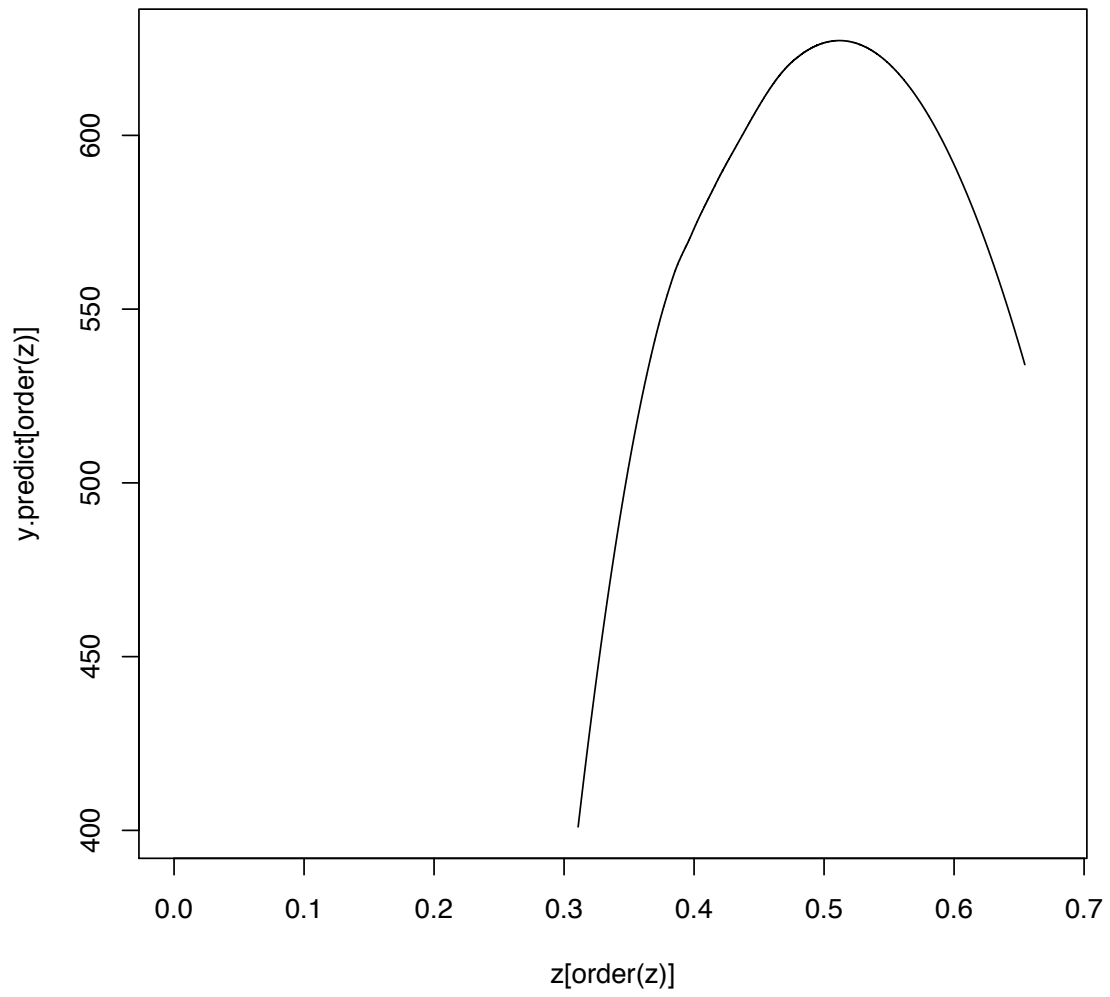

CVS201

### Loess Smoothing

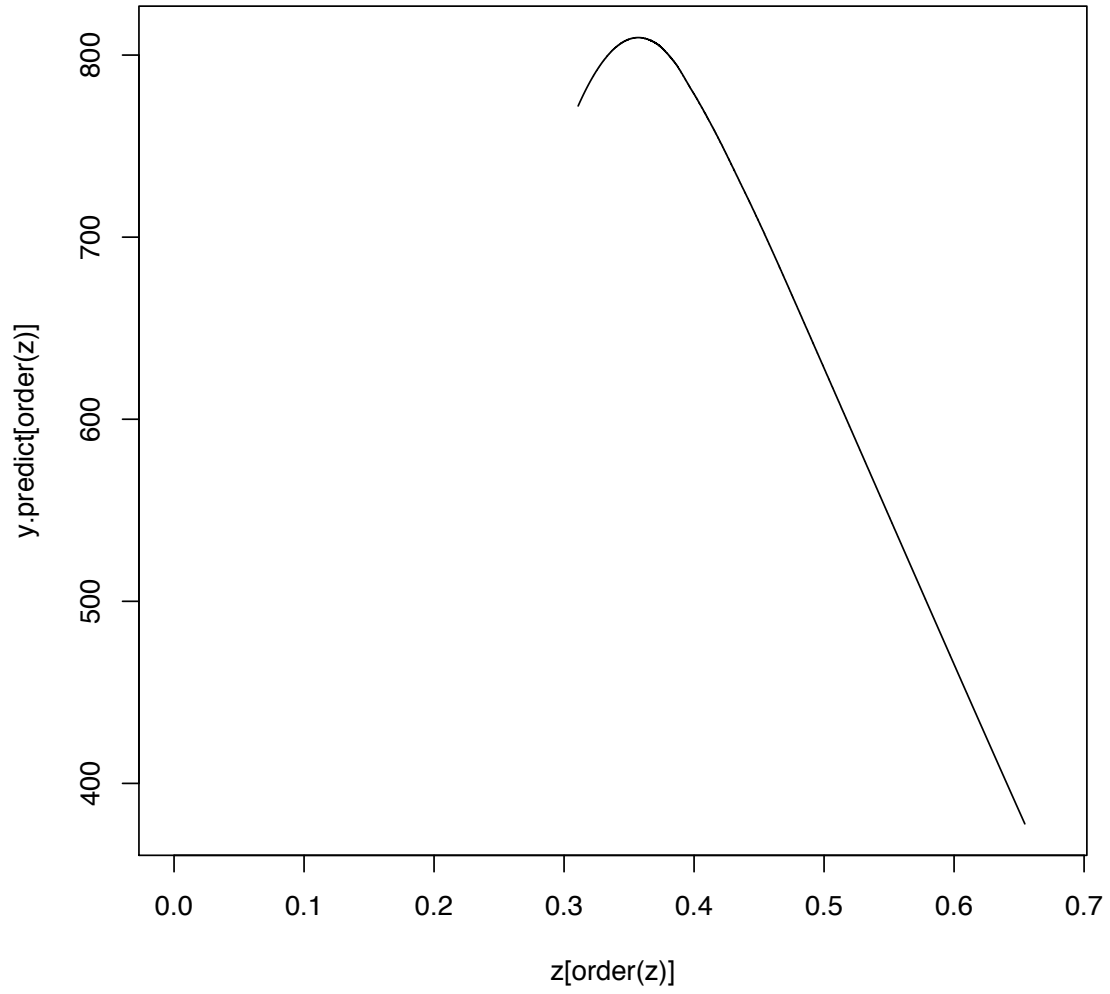



CVS200

### Loess Smoothing

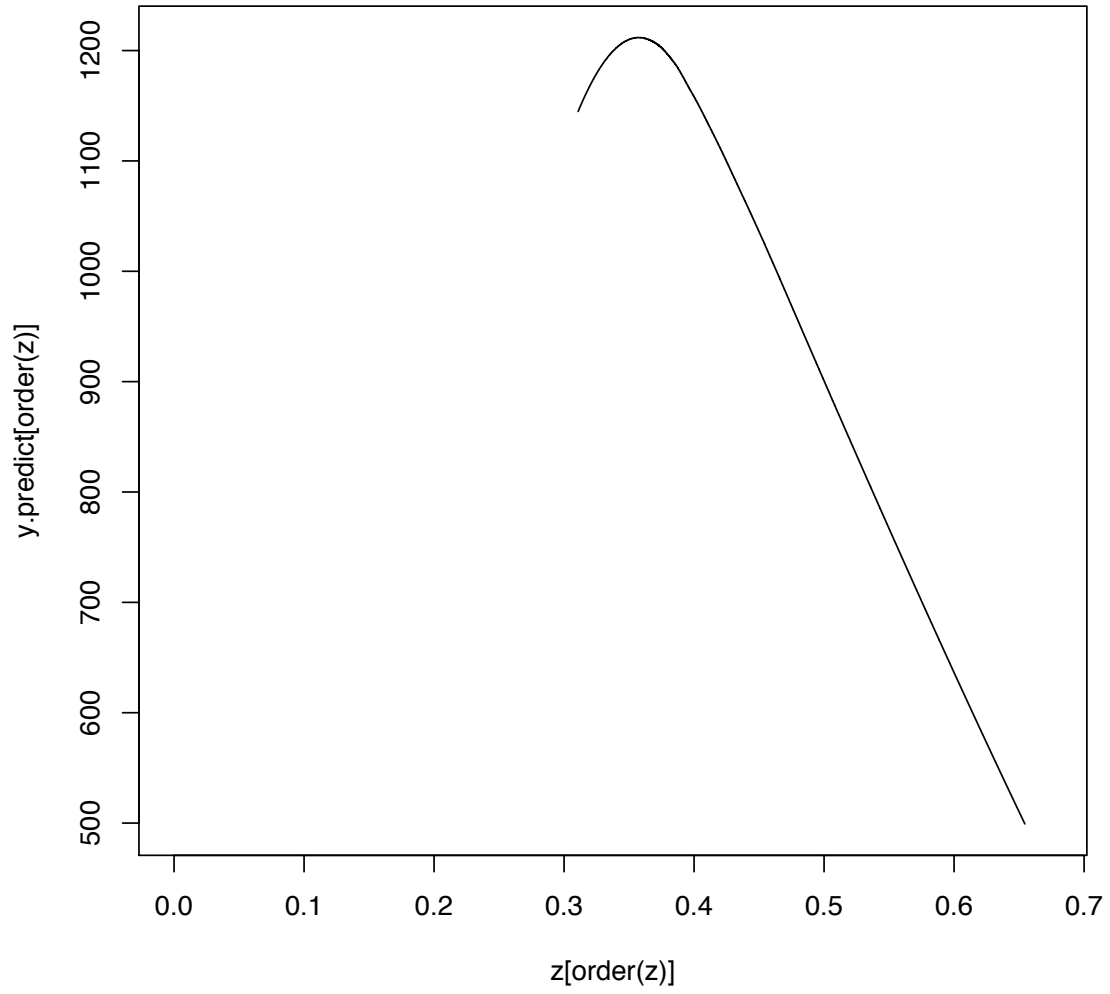

CVS199

### Loess Smoothing

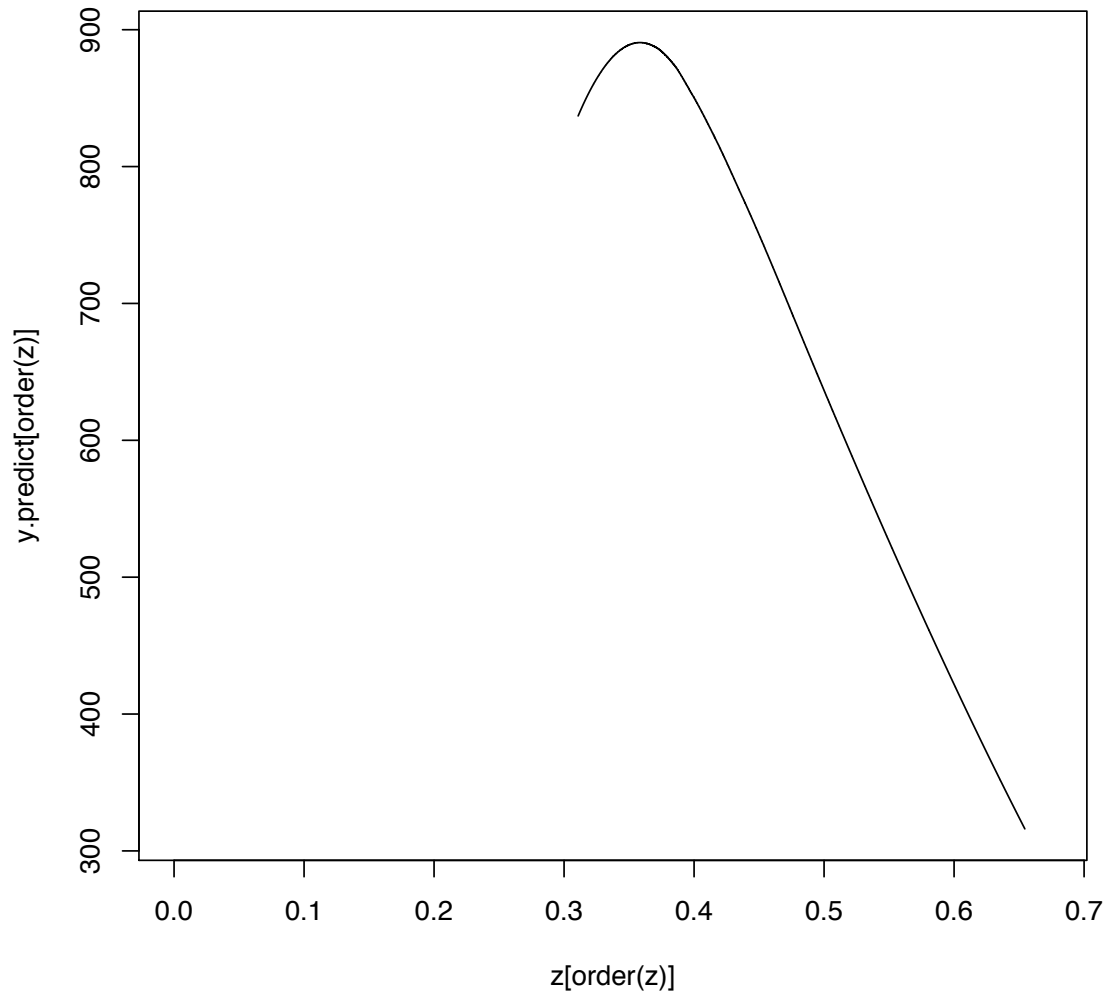

CVS185

### Loess Smoothing

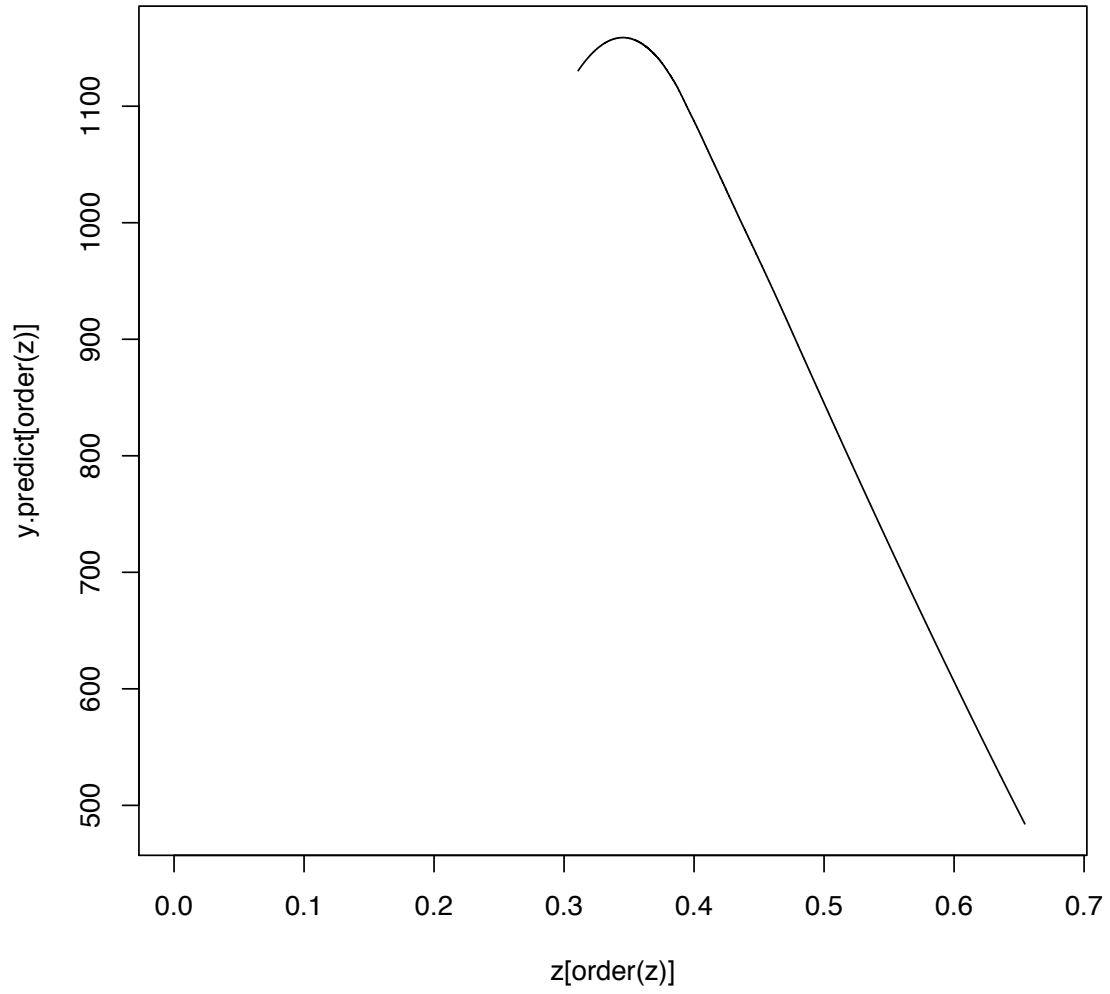

CVS184

### Loess Smoothing

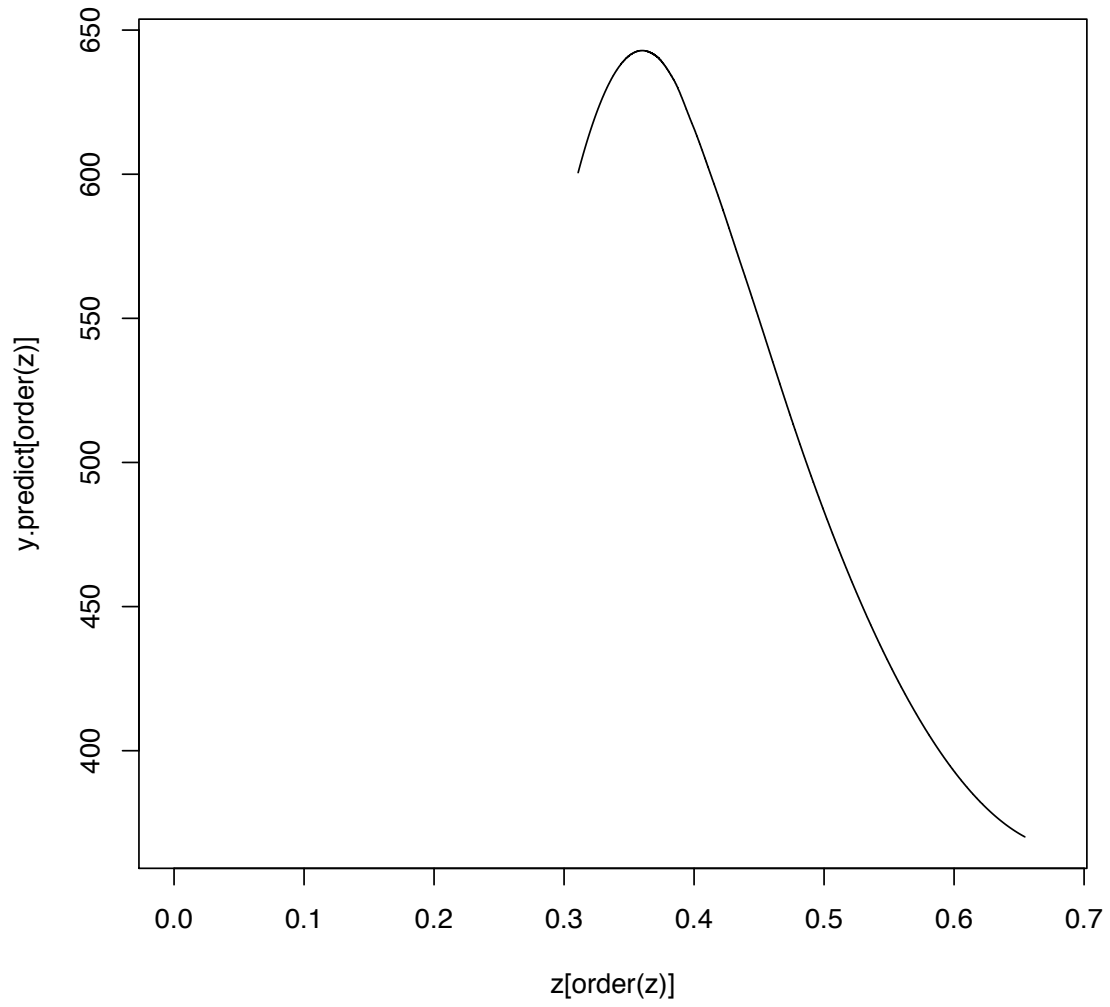

CVS183

### Loess Smoothing

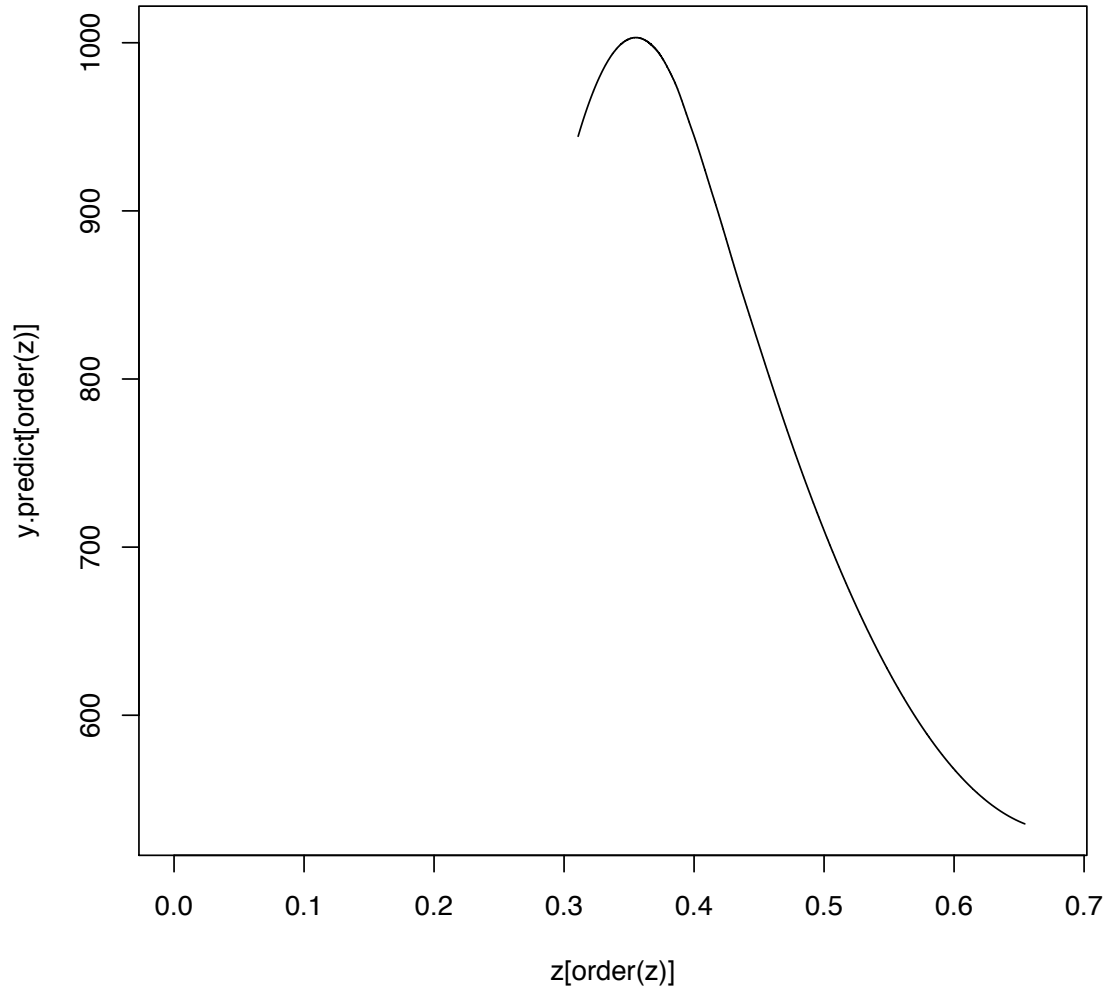

Supplement: pone.0153182.s001.pdf [file pone.0153182.s001.pdf]
