# Supplementary material for: High Levels of Sample-to-Sample Variation Confound Data Analysis for Non-Invasive Prenatal Screening of Fetal Microdeletions
Source: PubMed Central journal article supplement (PMC4889033; doi:10.1371/journal.pone.0153182), 2016-06-01

Chr1

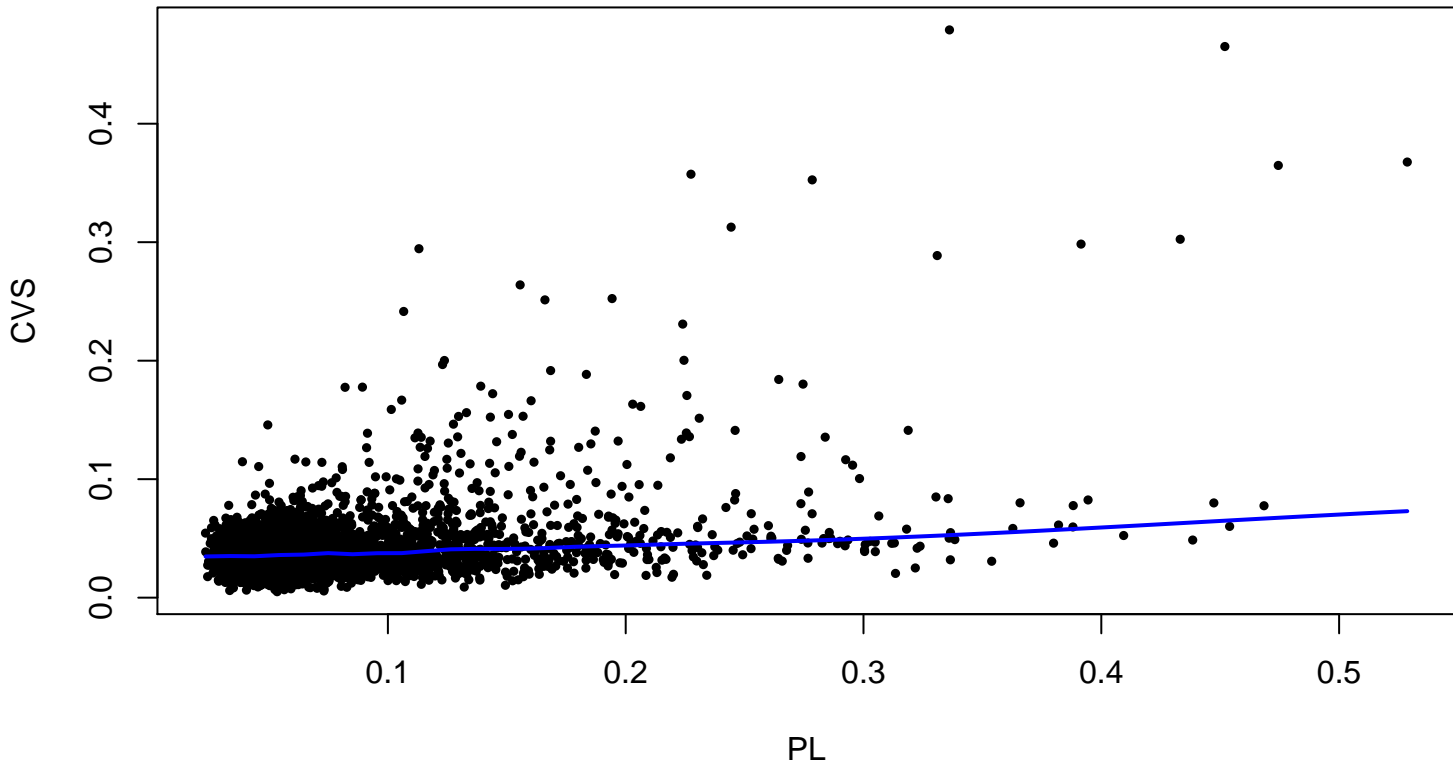

Chr1

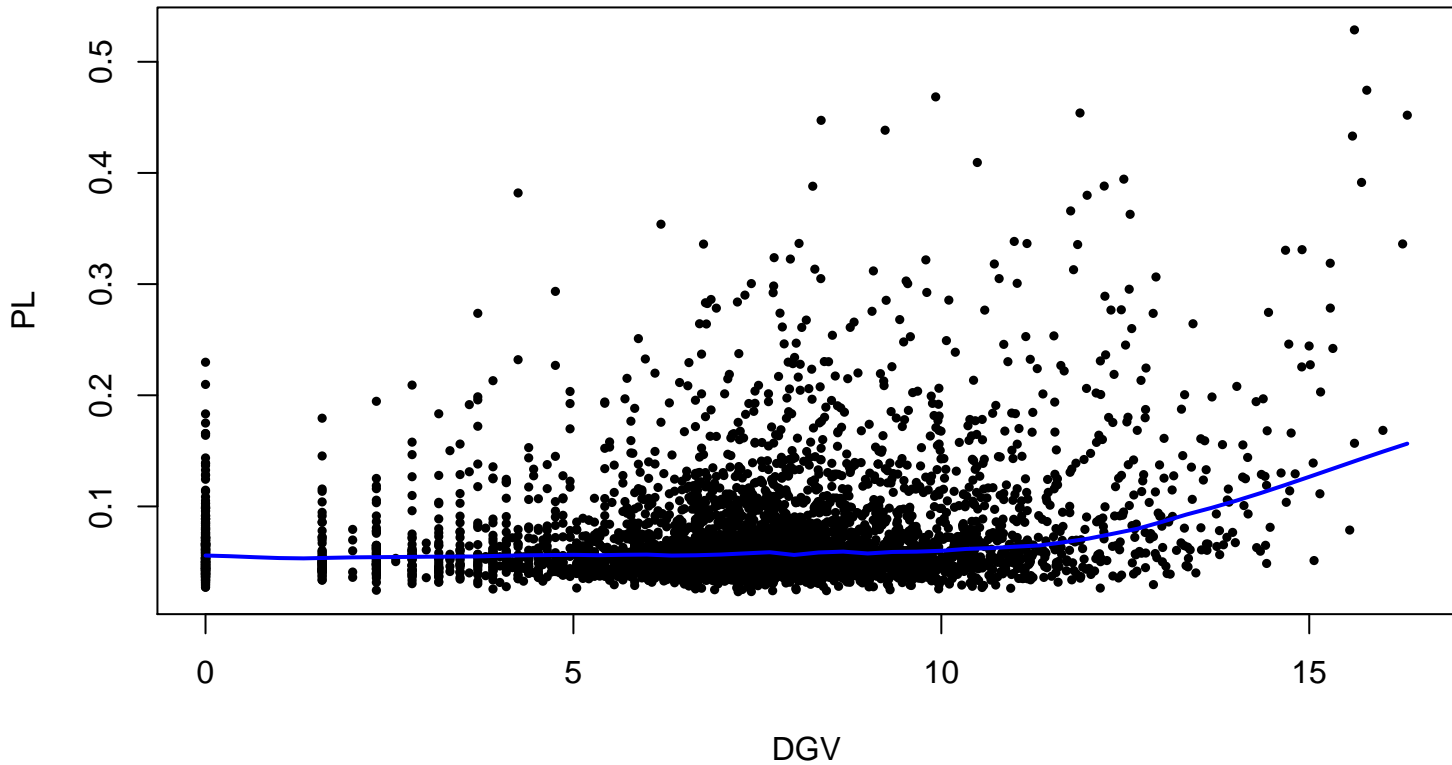

Chr1

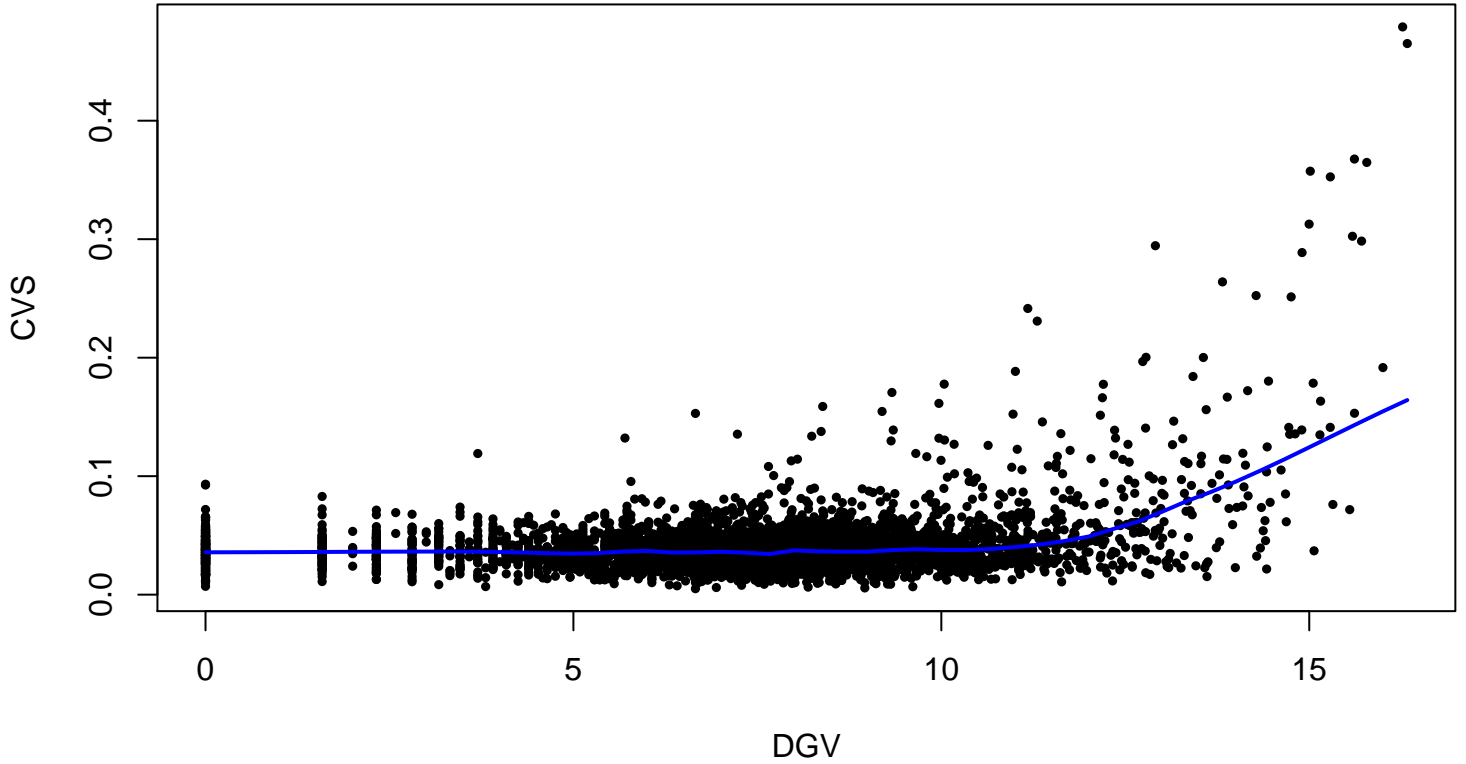

Chr2

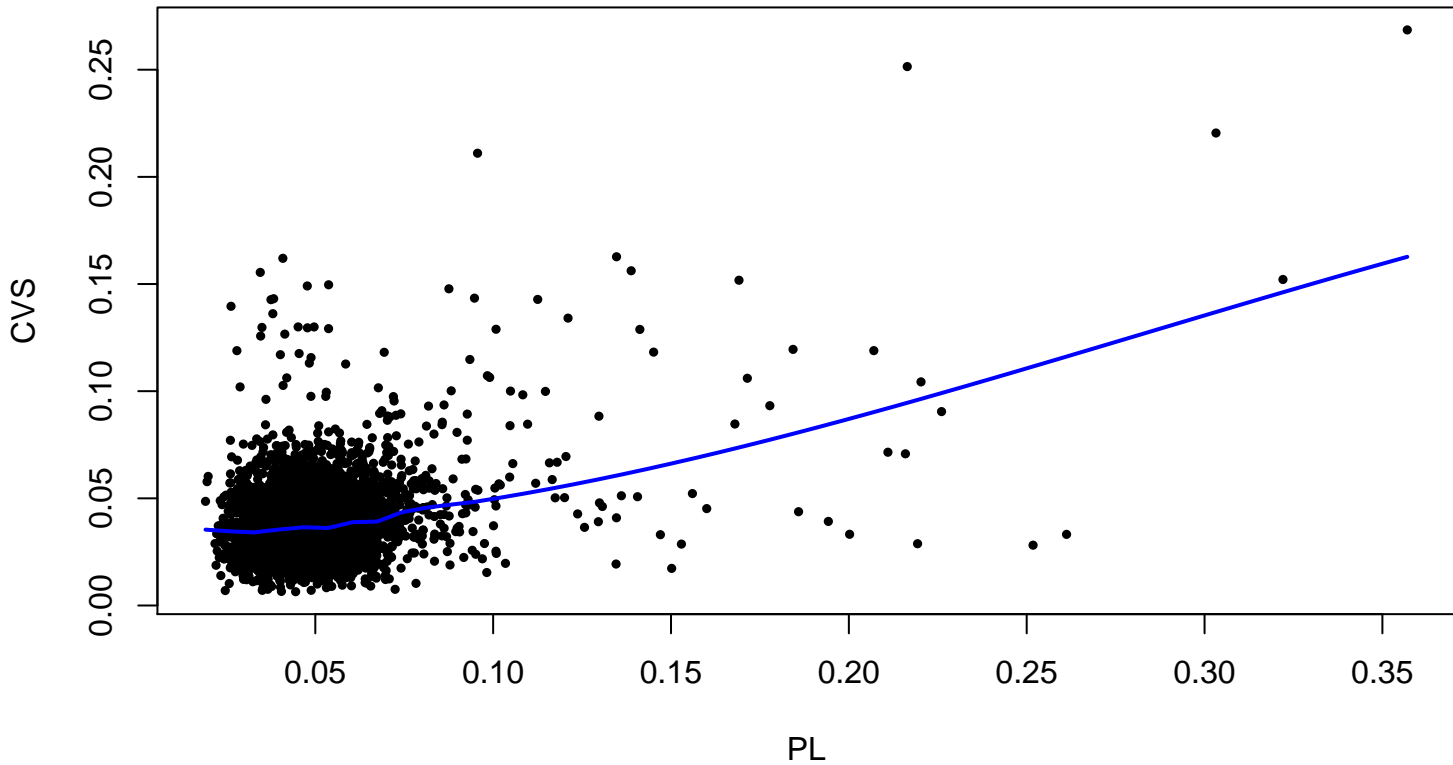

Chr2

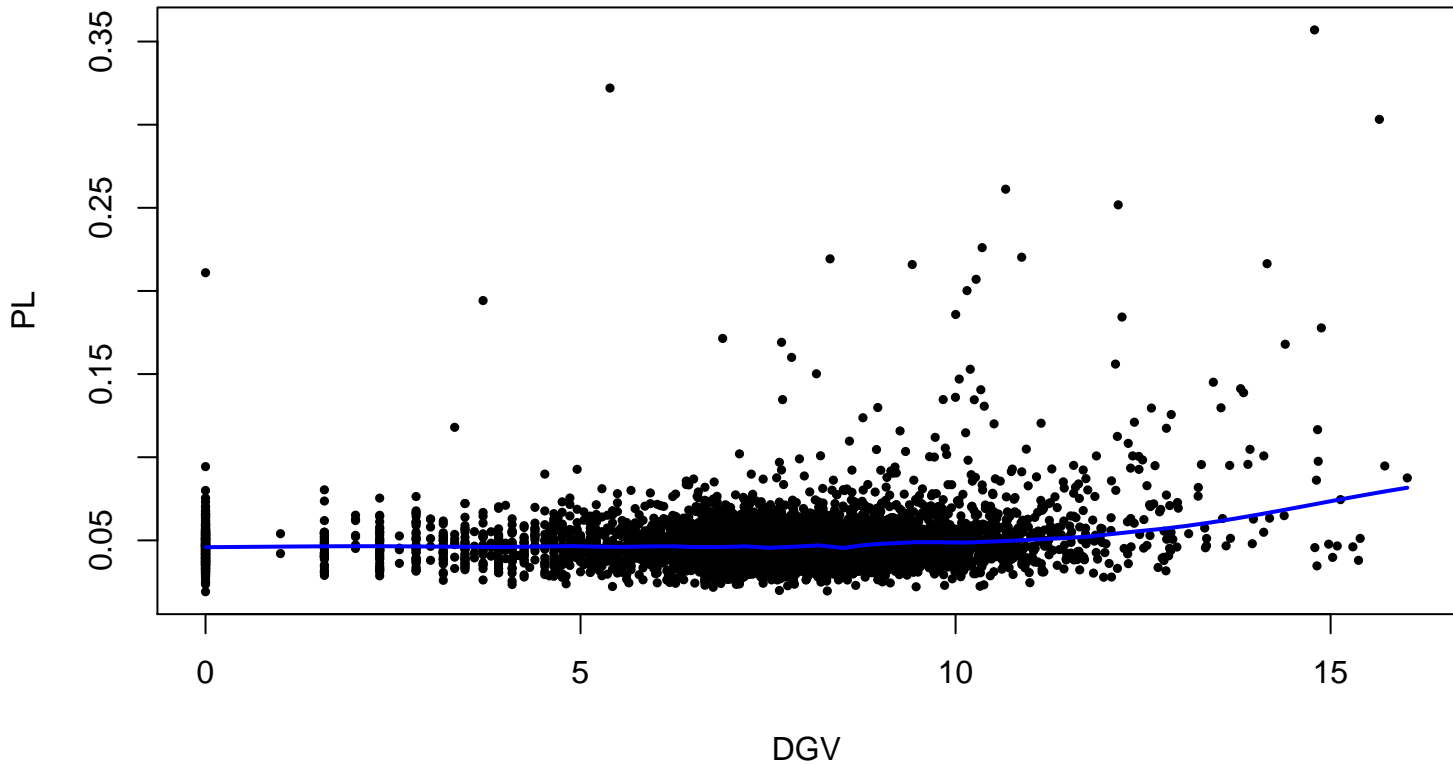

Chr2

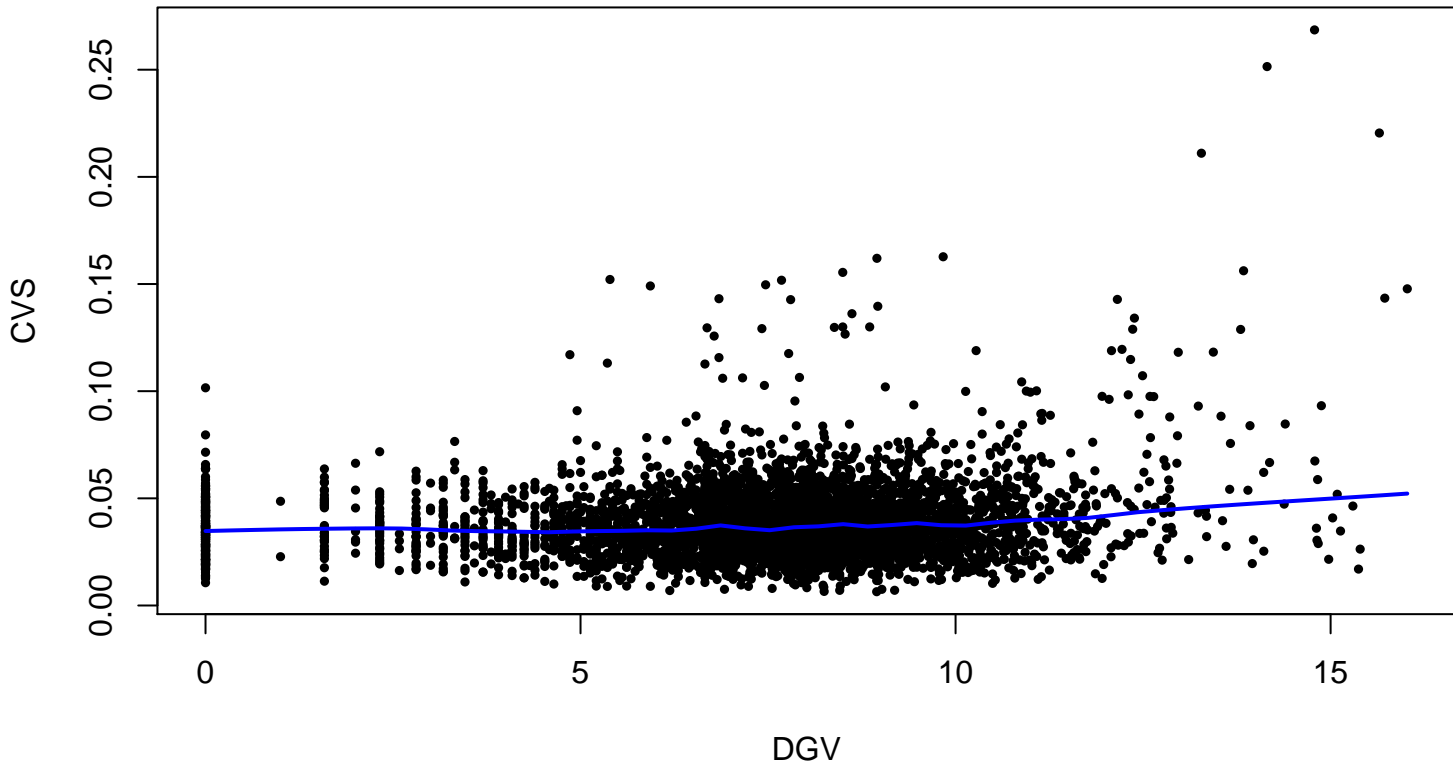

# Chr3

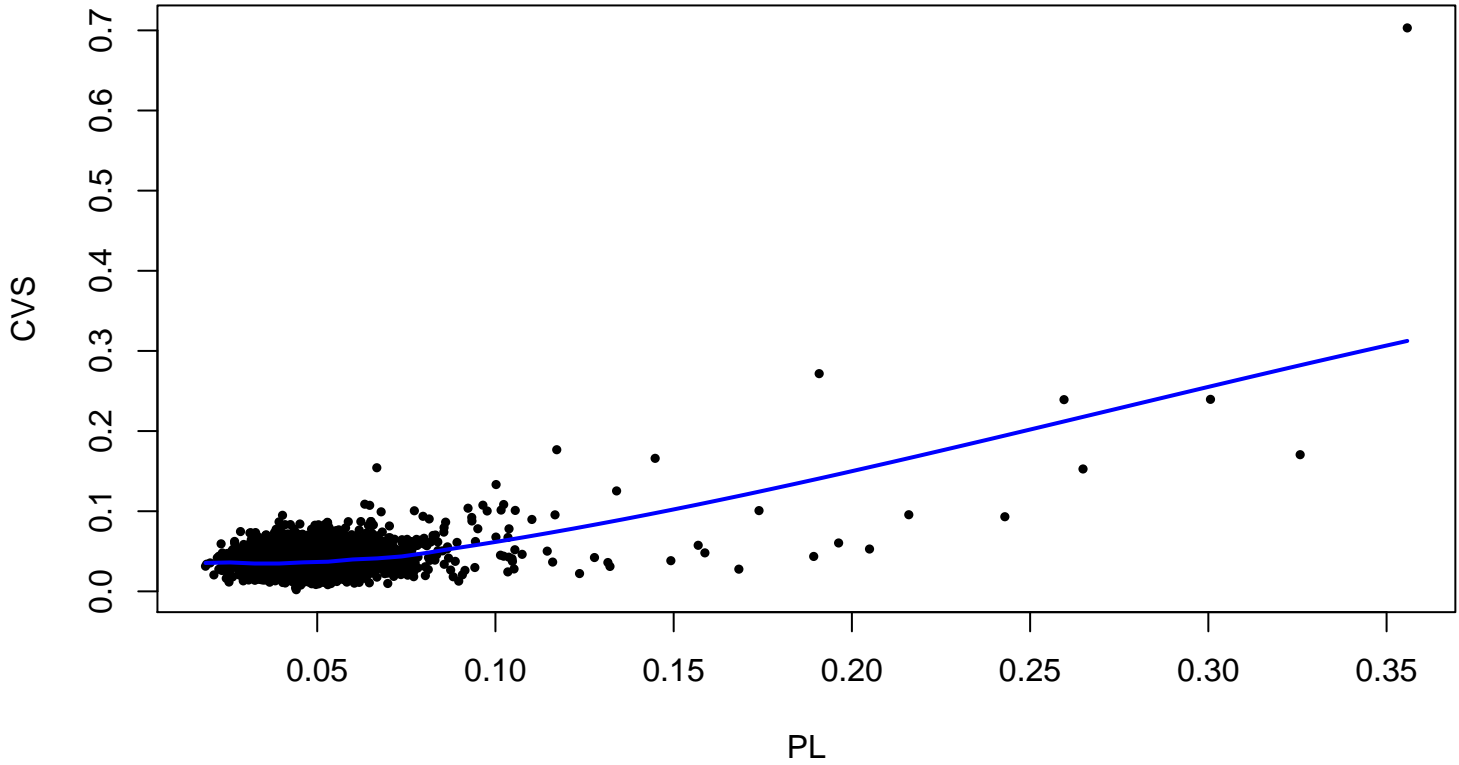

Chr3

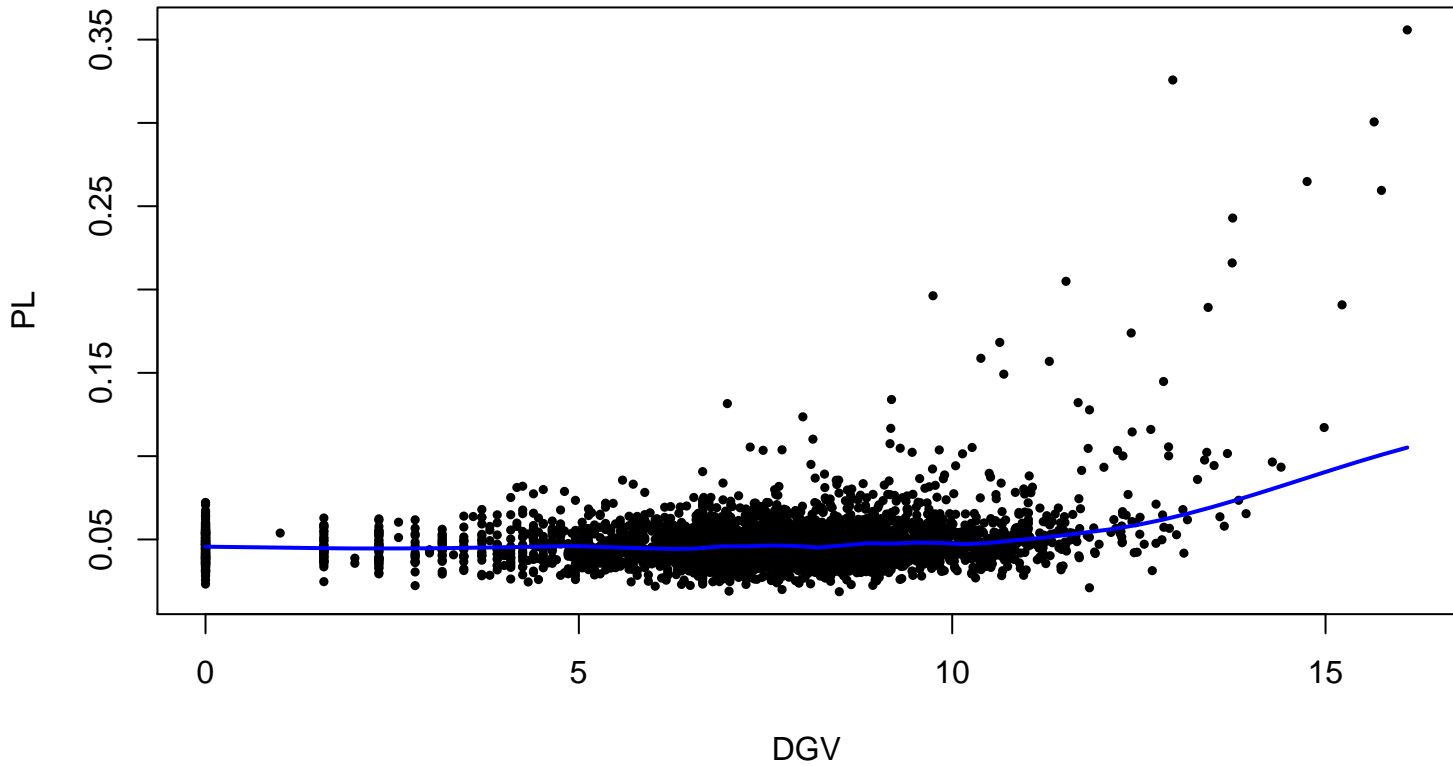



# Chr3

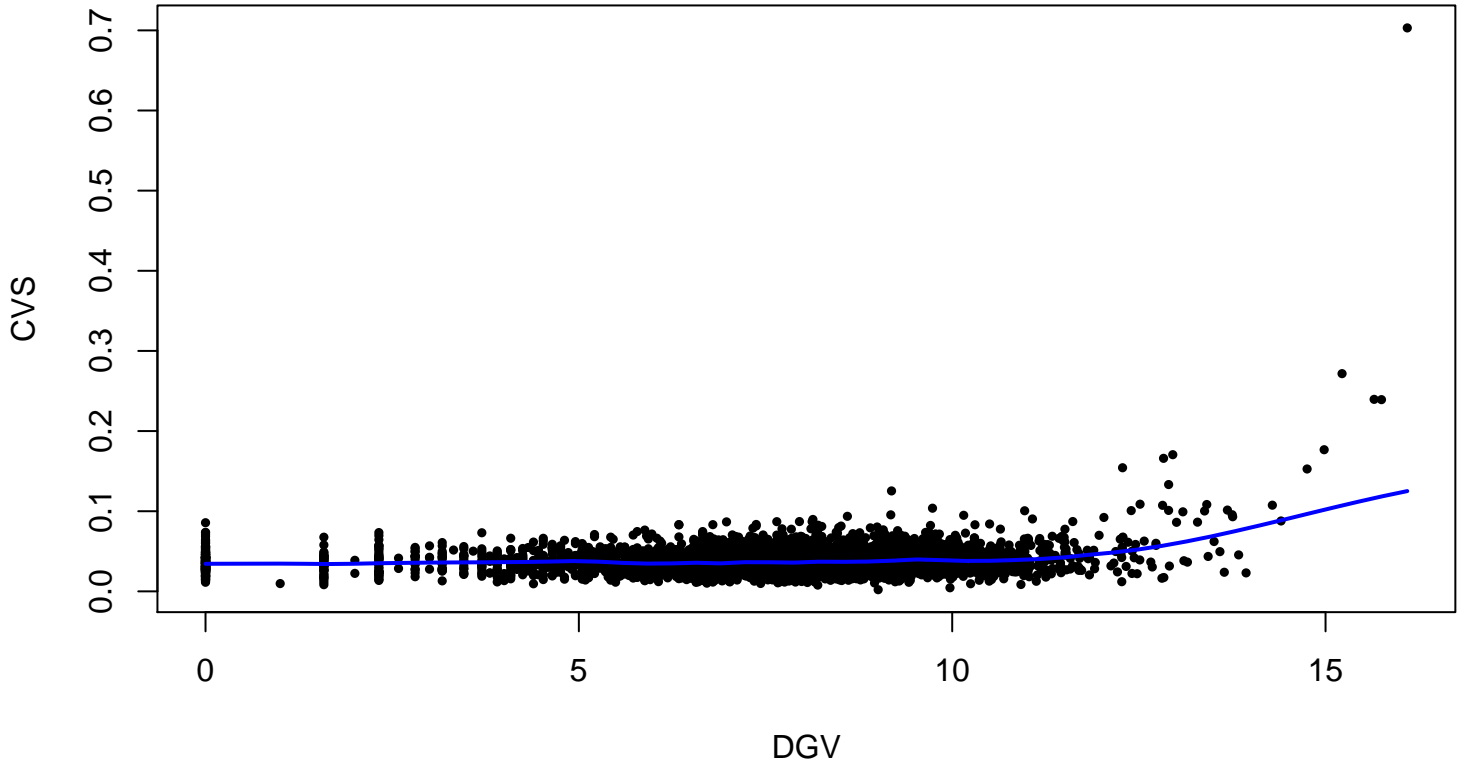

Chr4

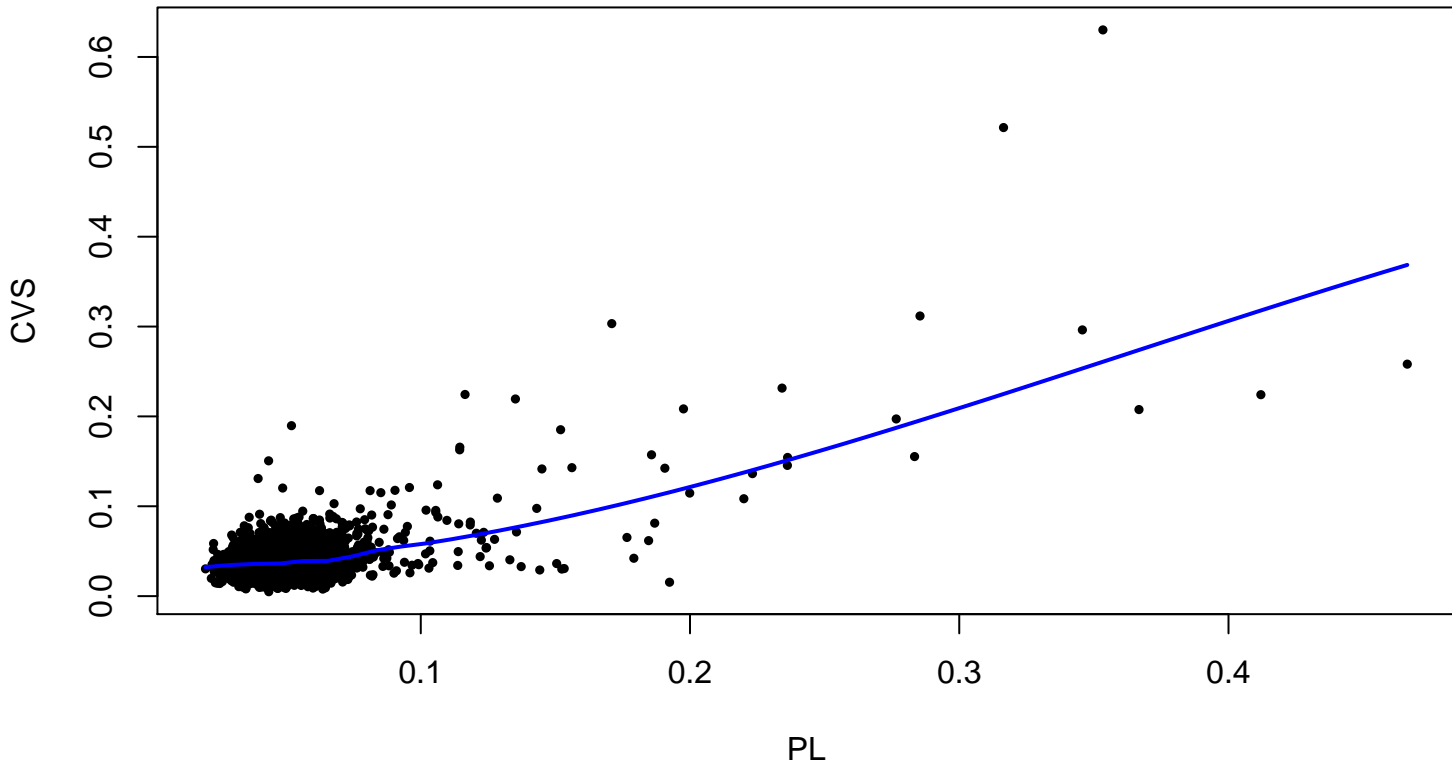

# Chr4

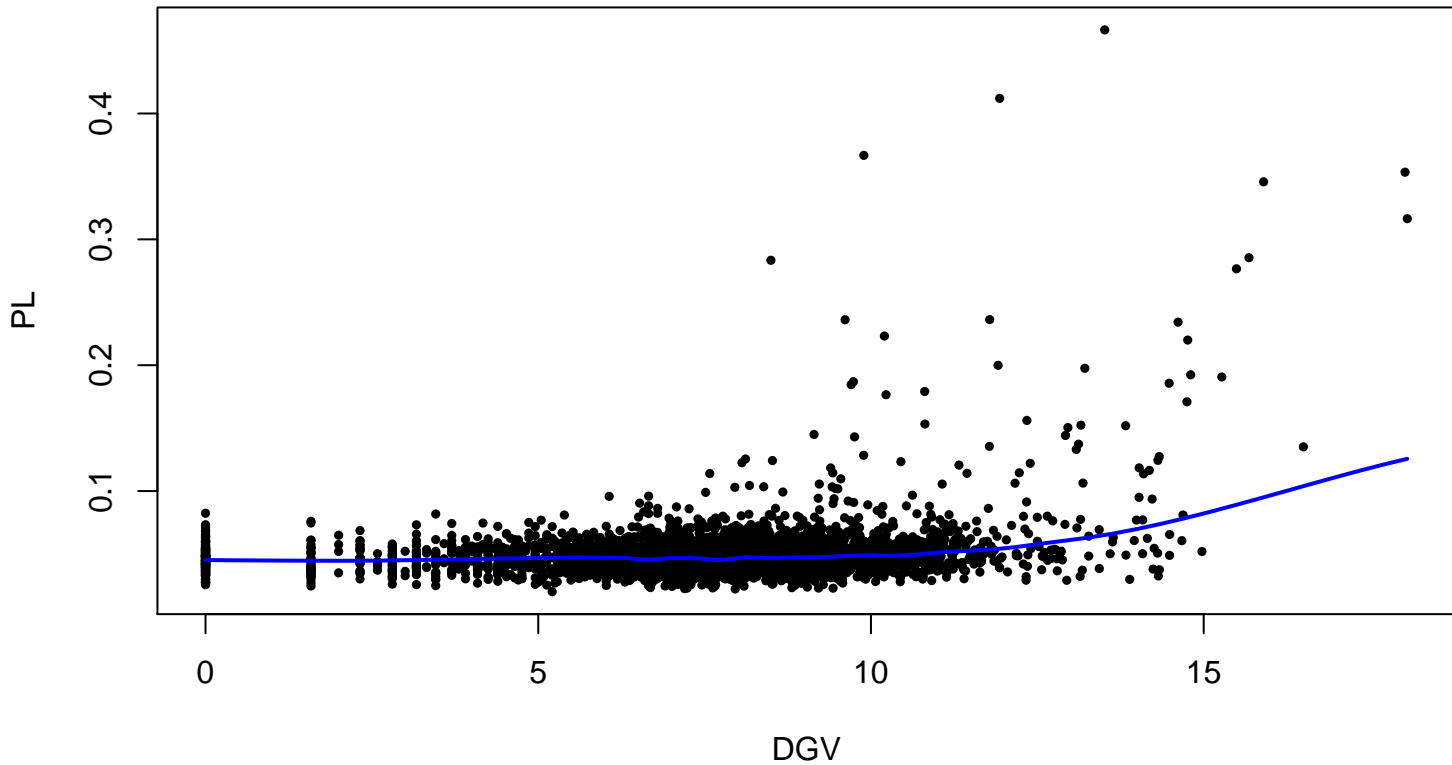

# Chr4

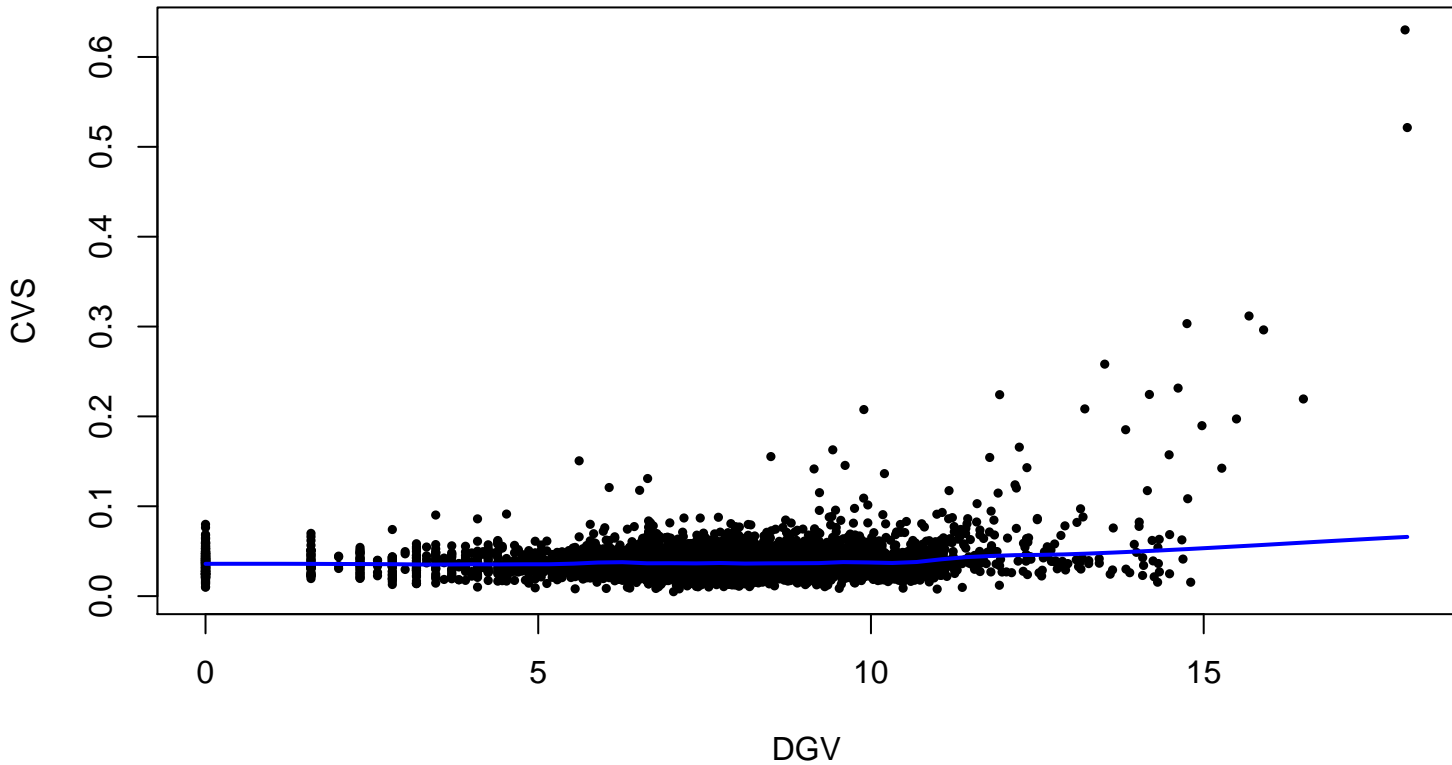

Chr5

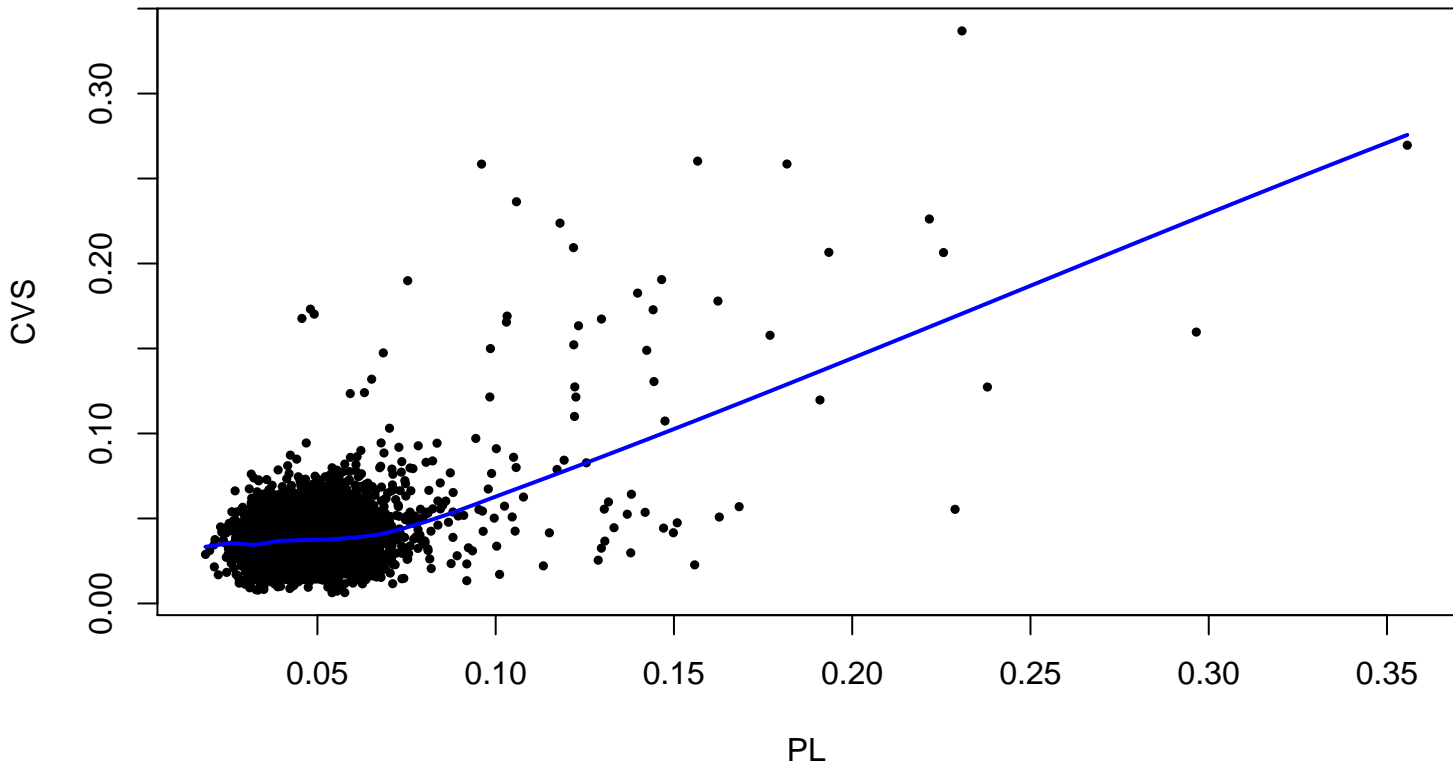

# Chr5

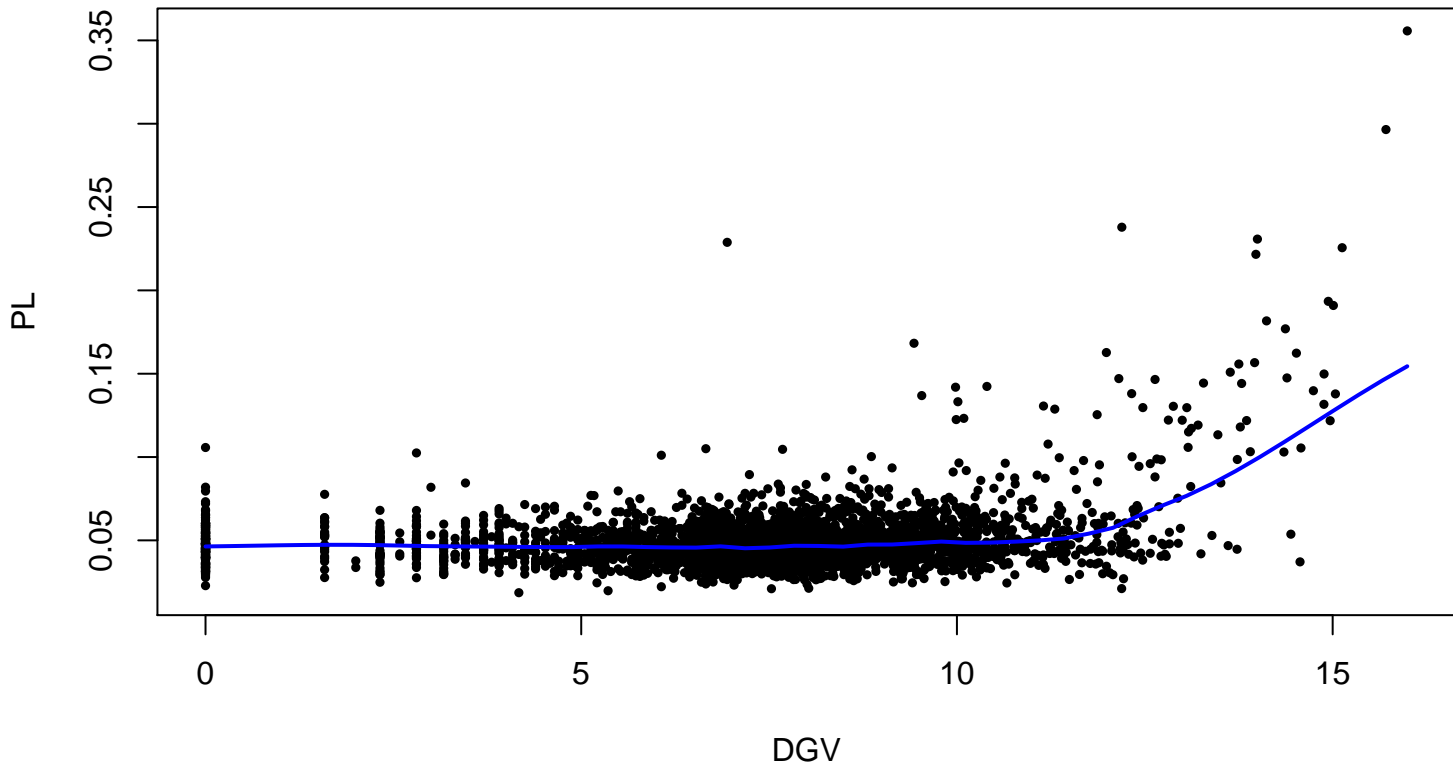

Chr5

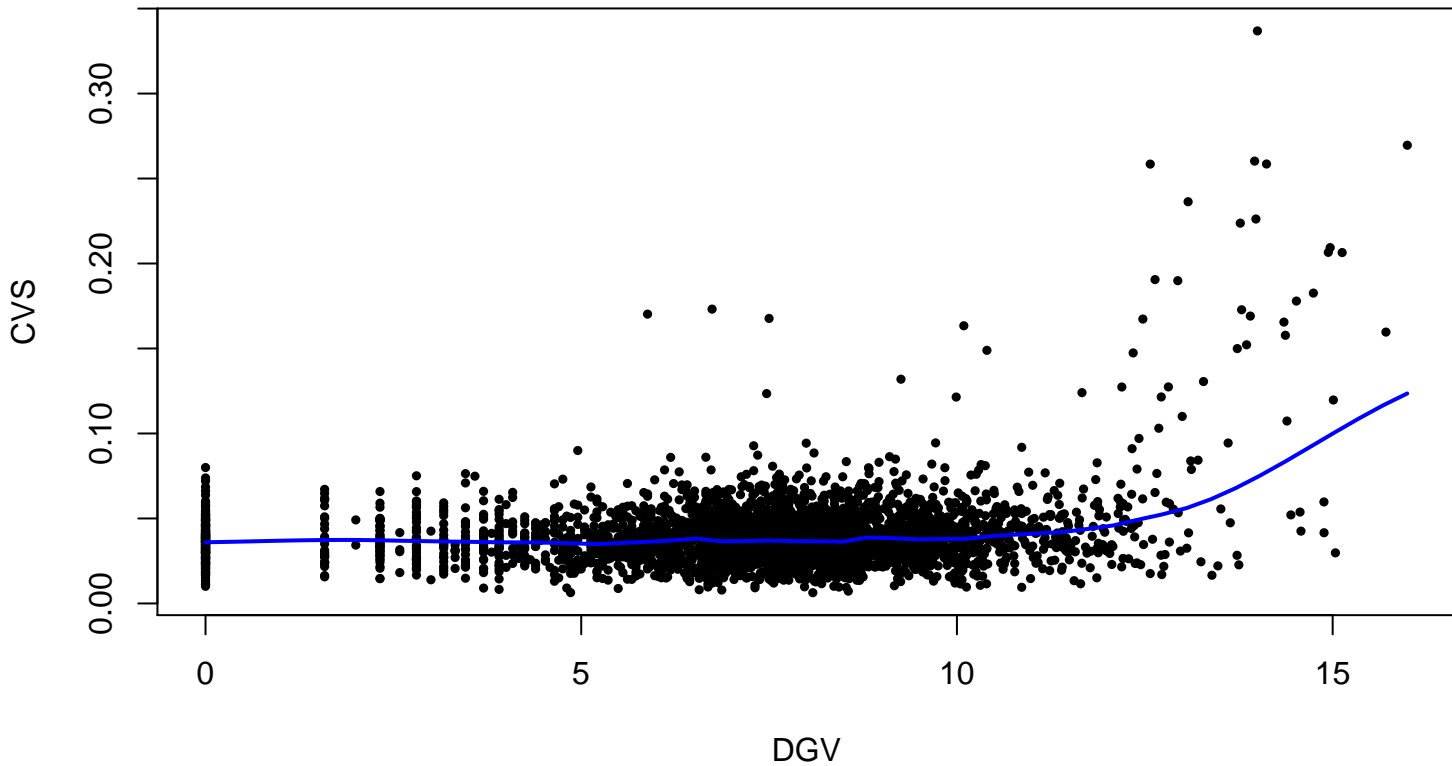

# Chr6

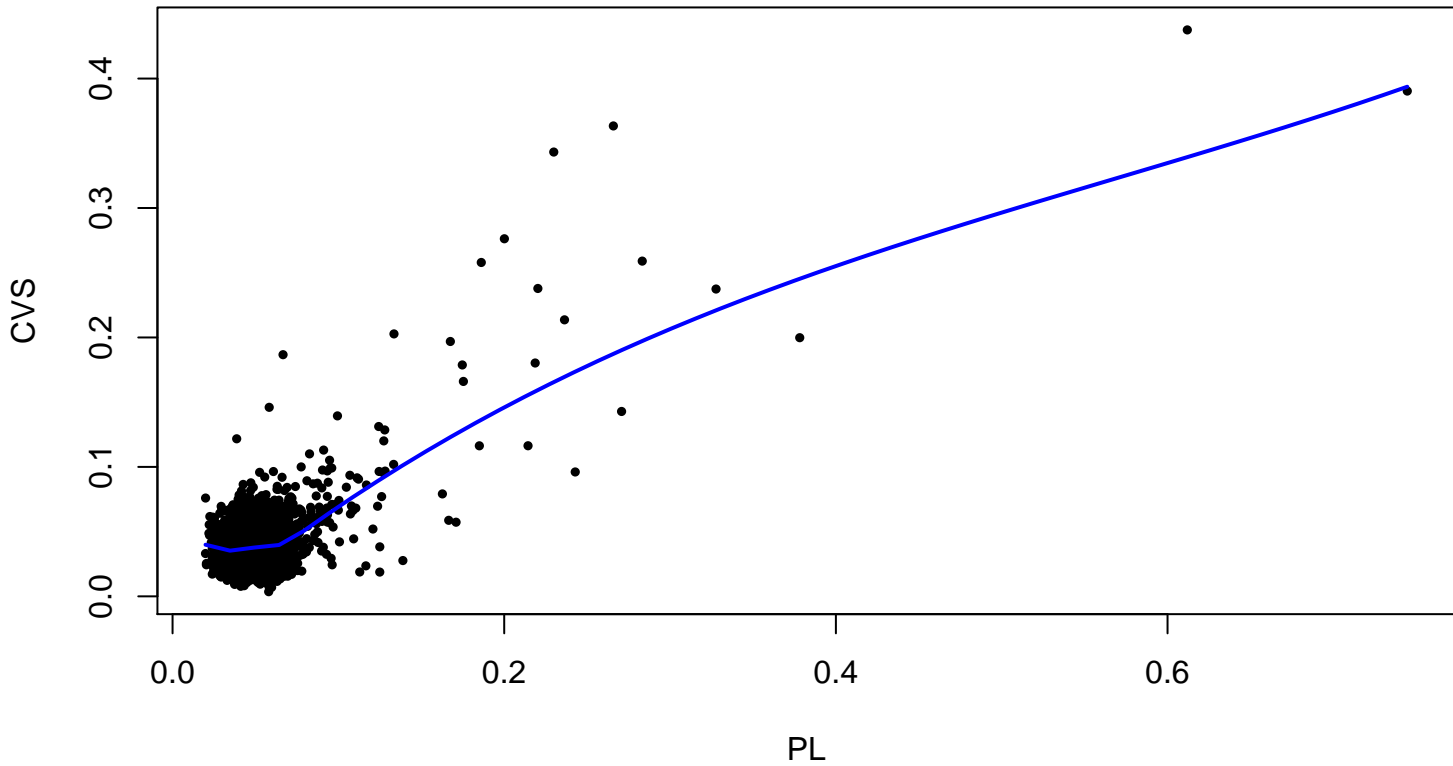



Chr6

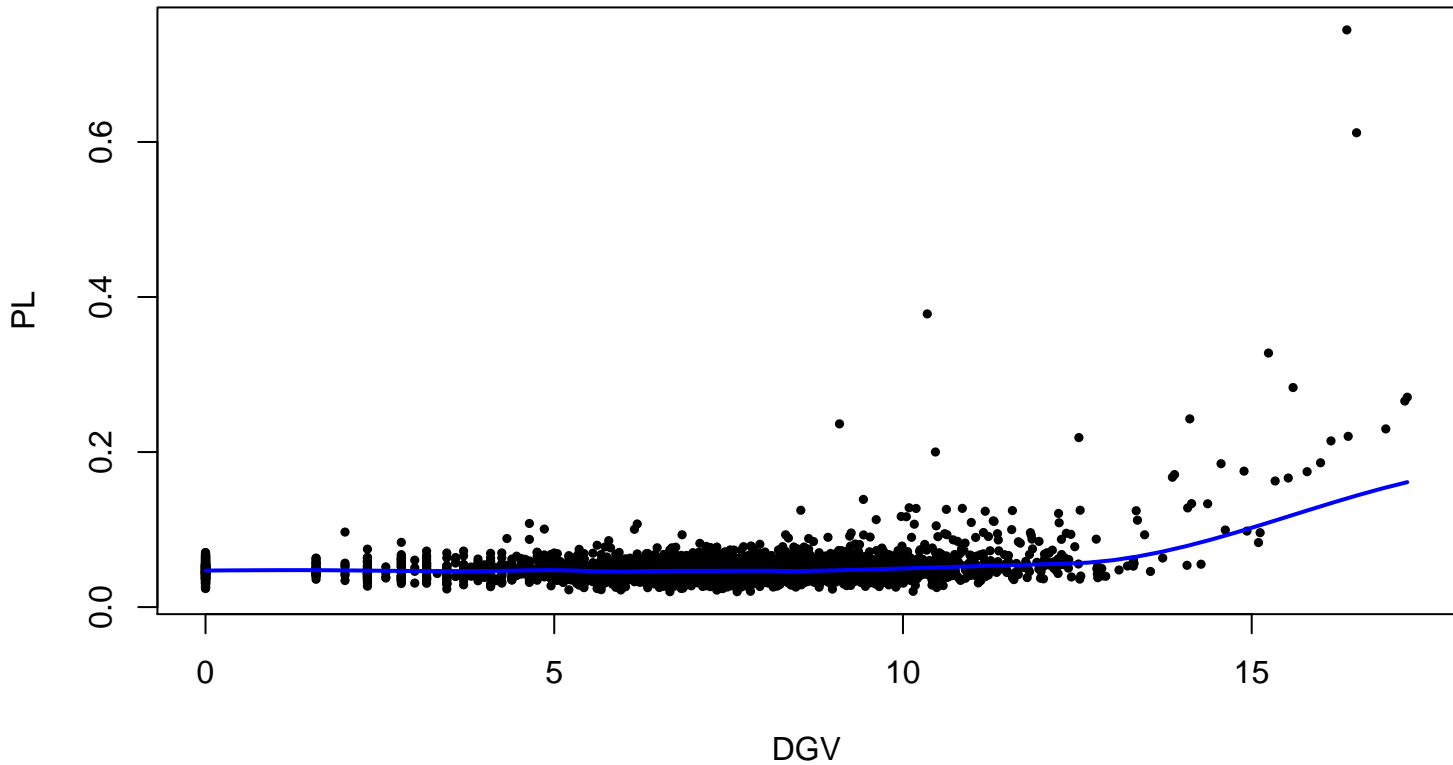

# Chr6

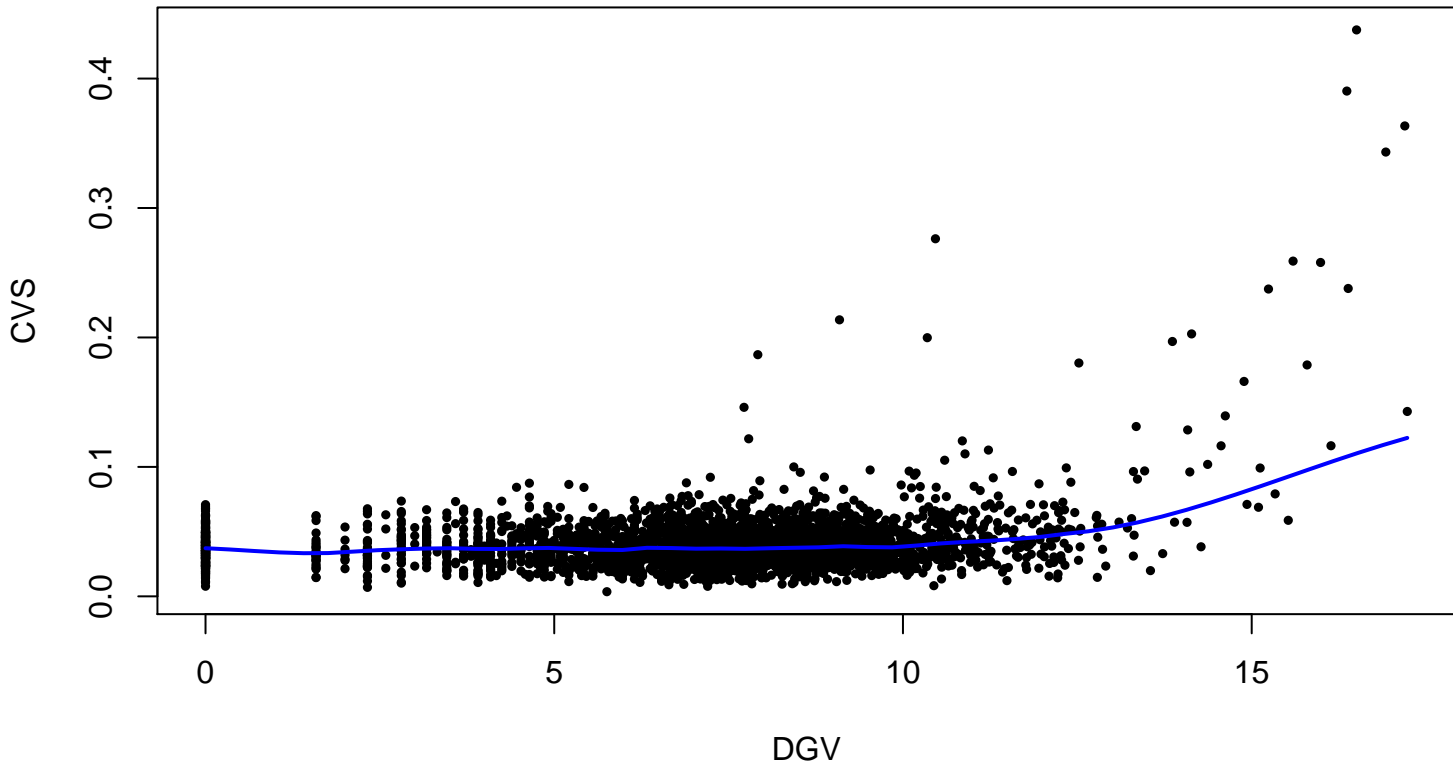

Chr7

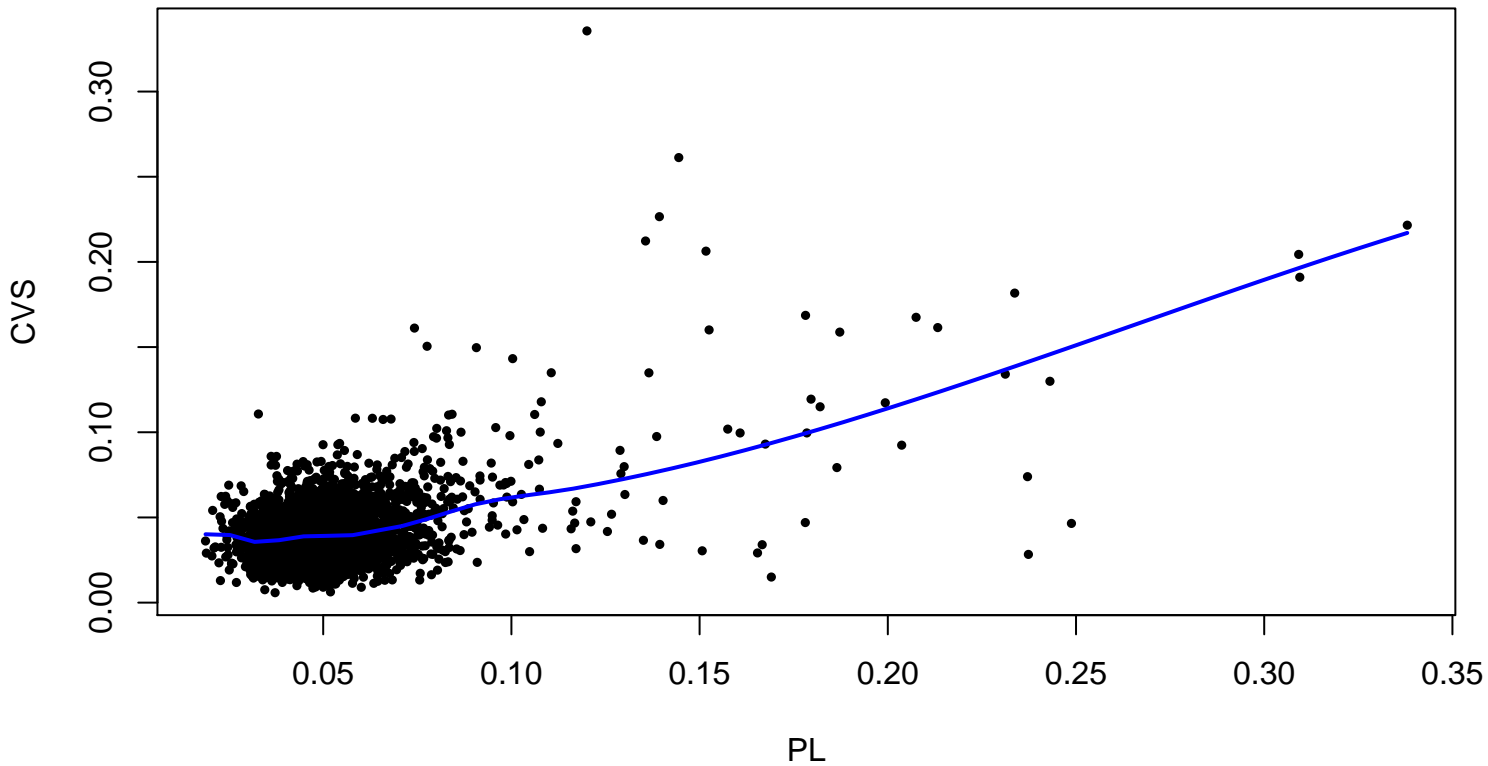

Chr7

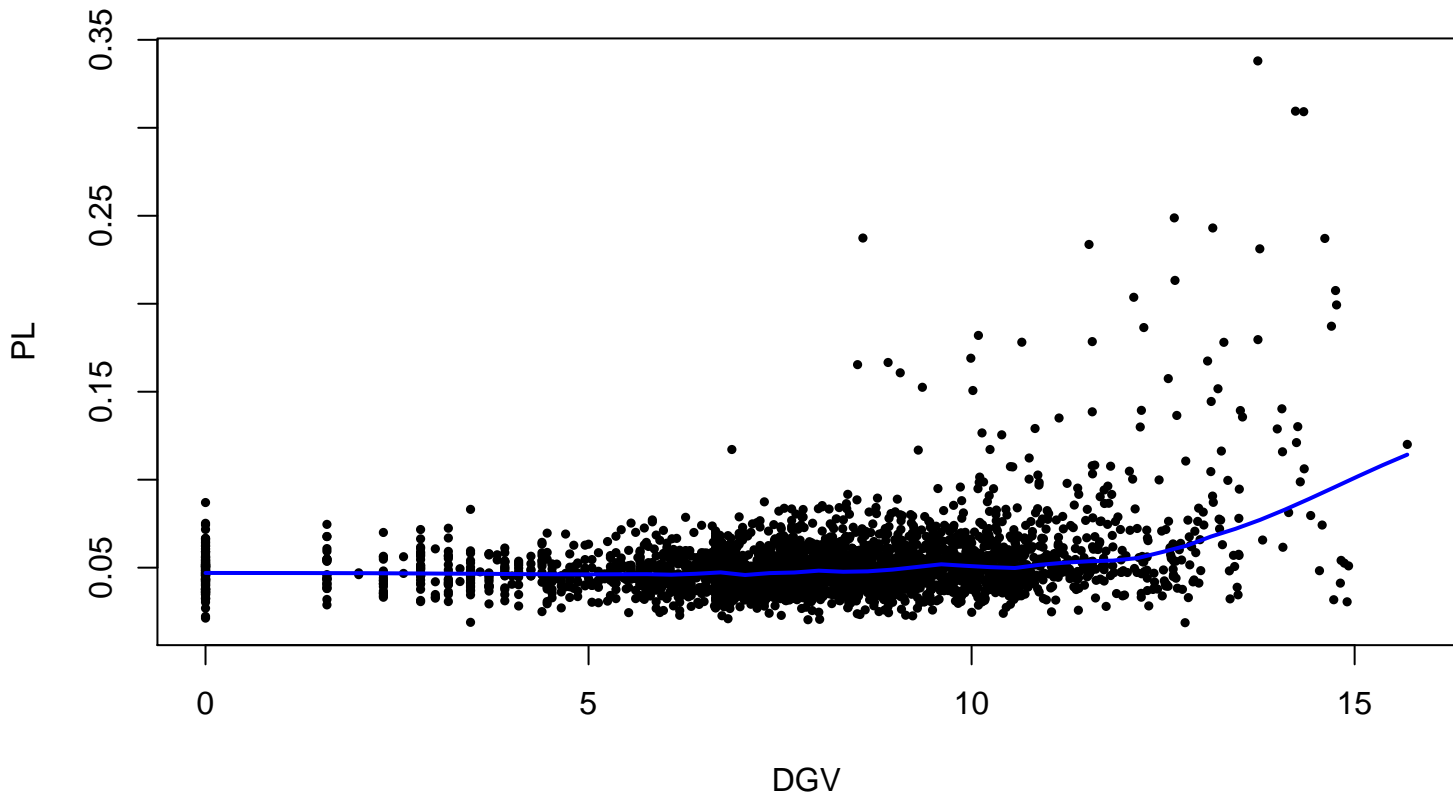

Chr7

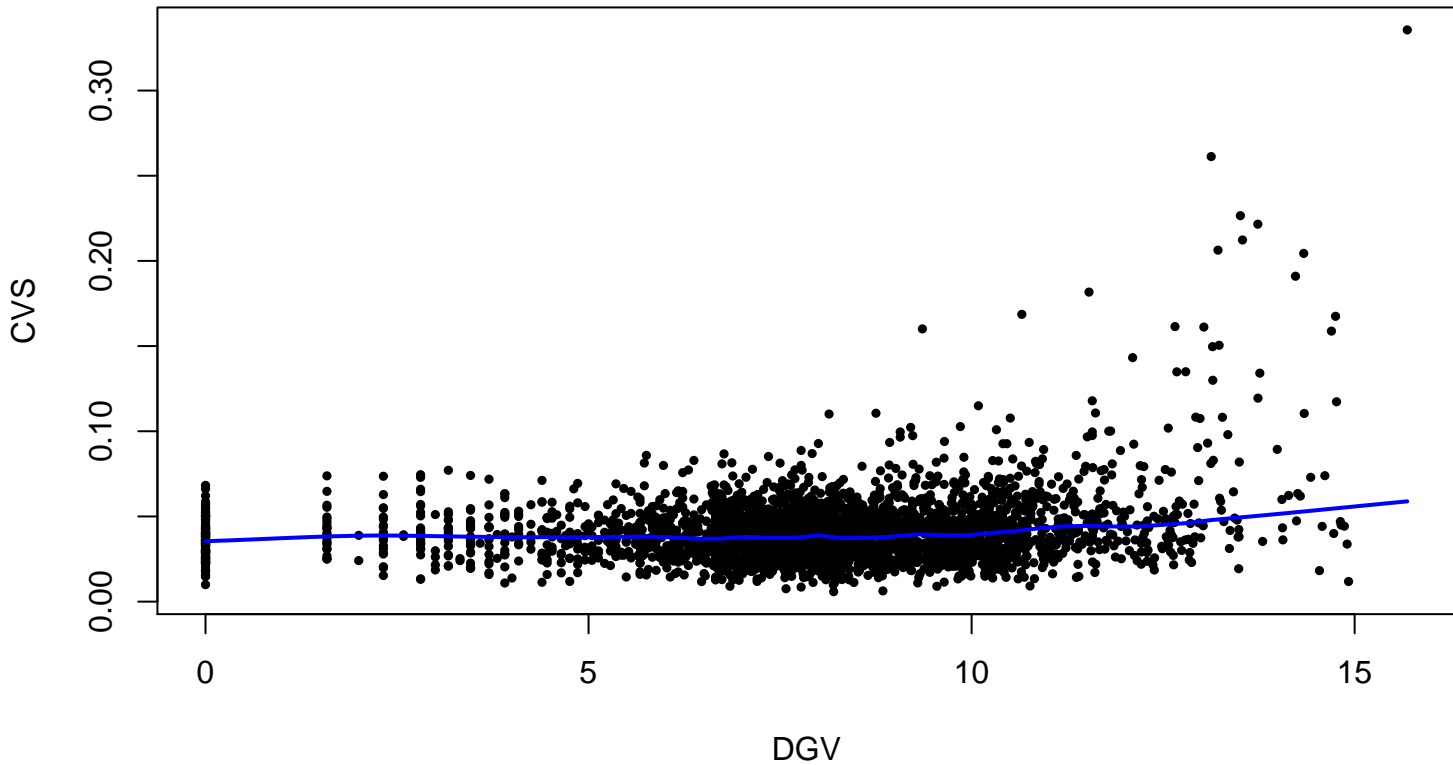

Chr8

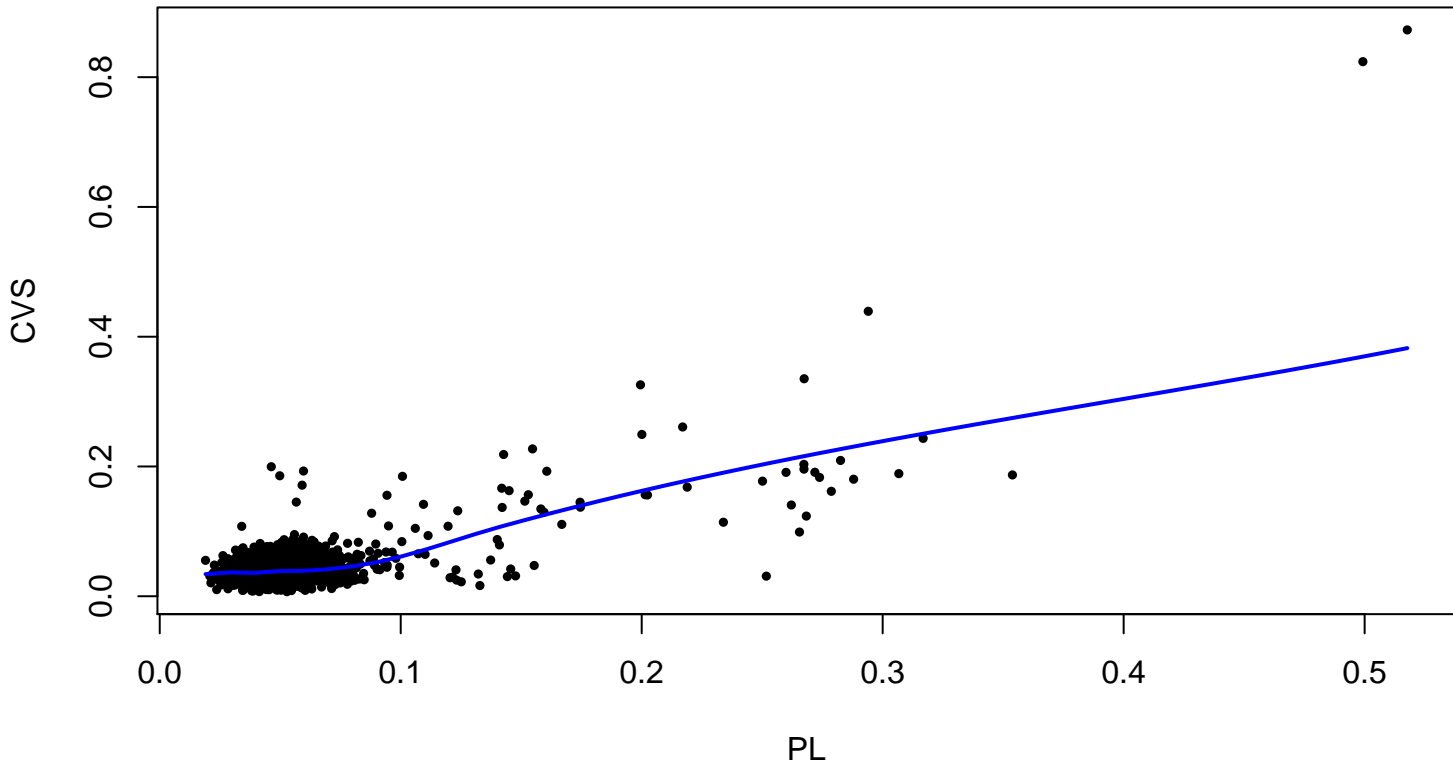

Chr8

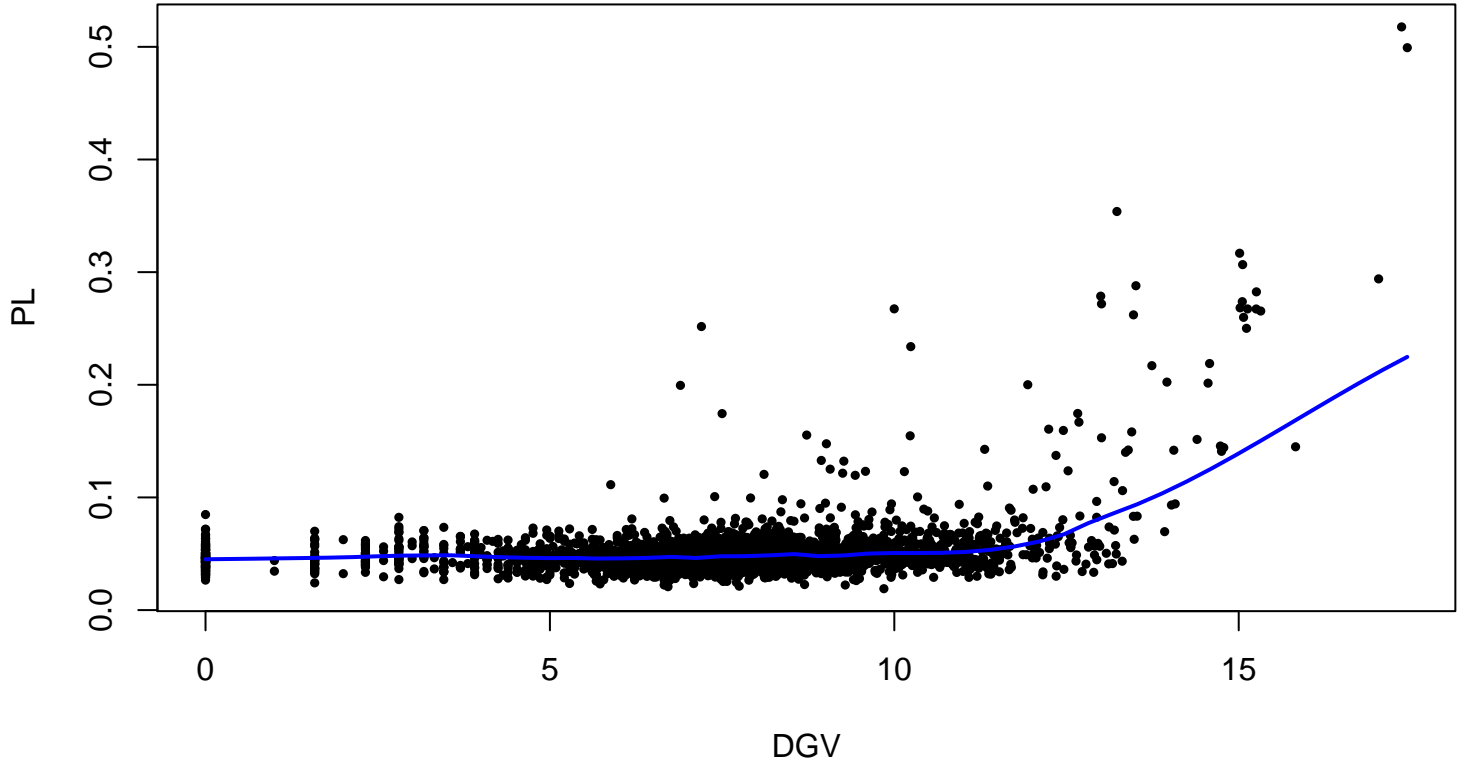

# Chr8

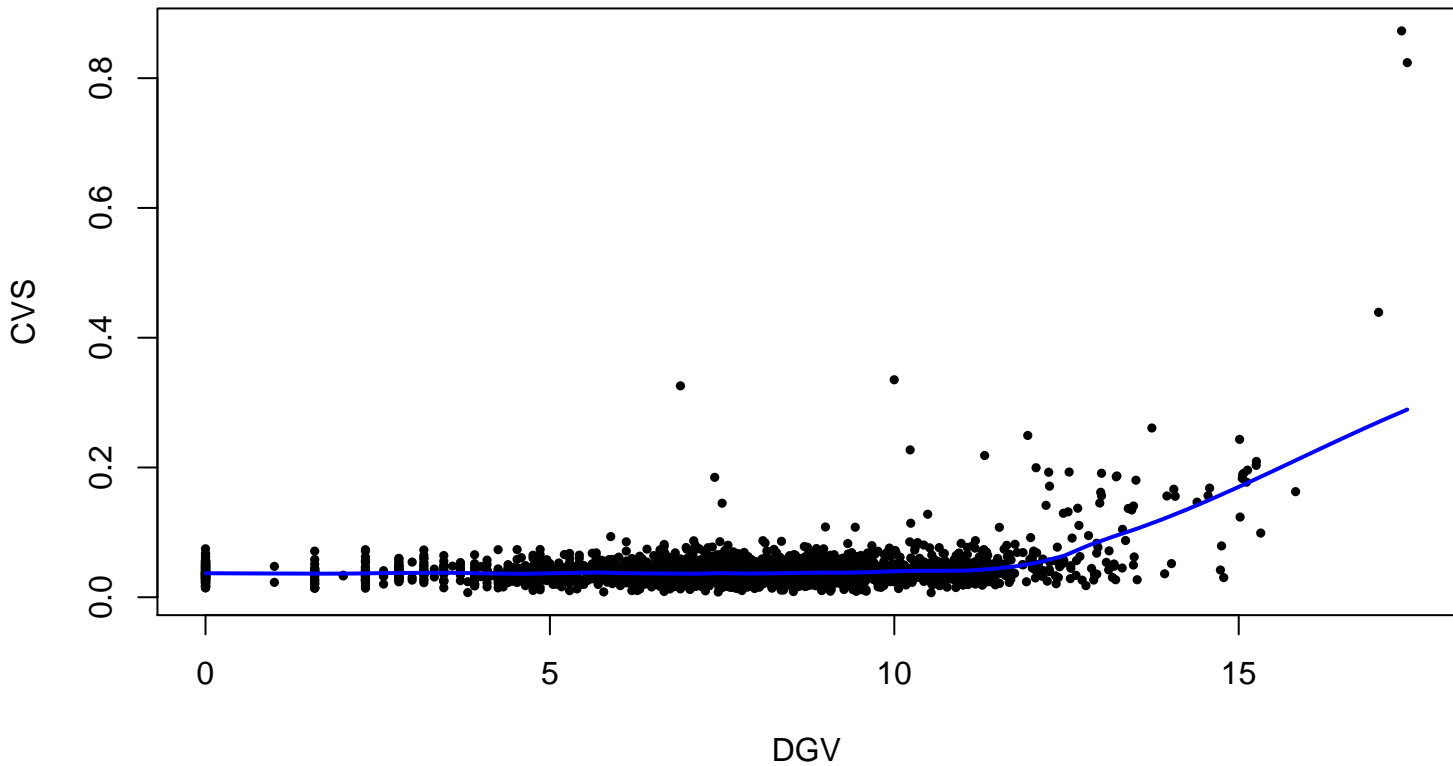



# Chr9

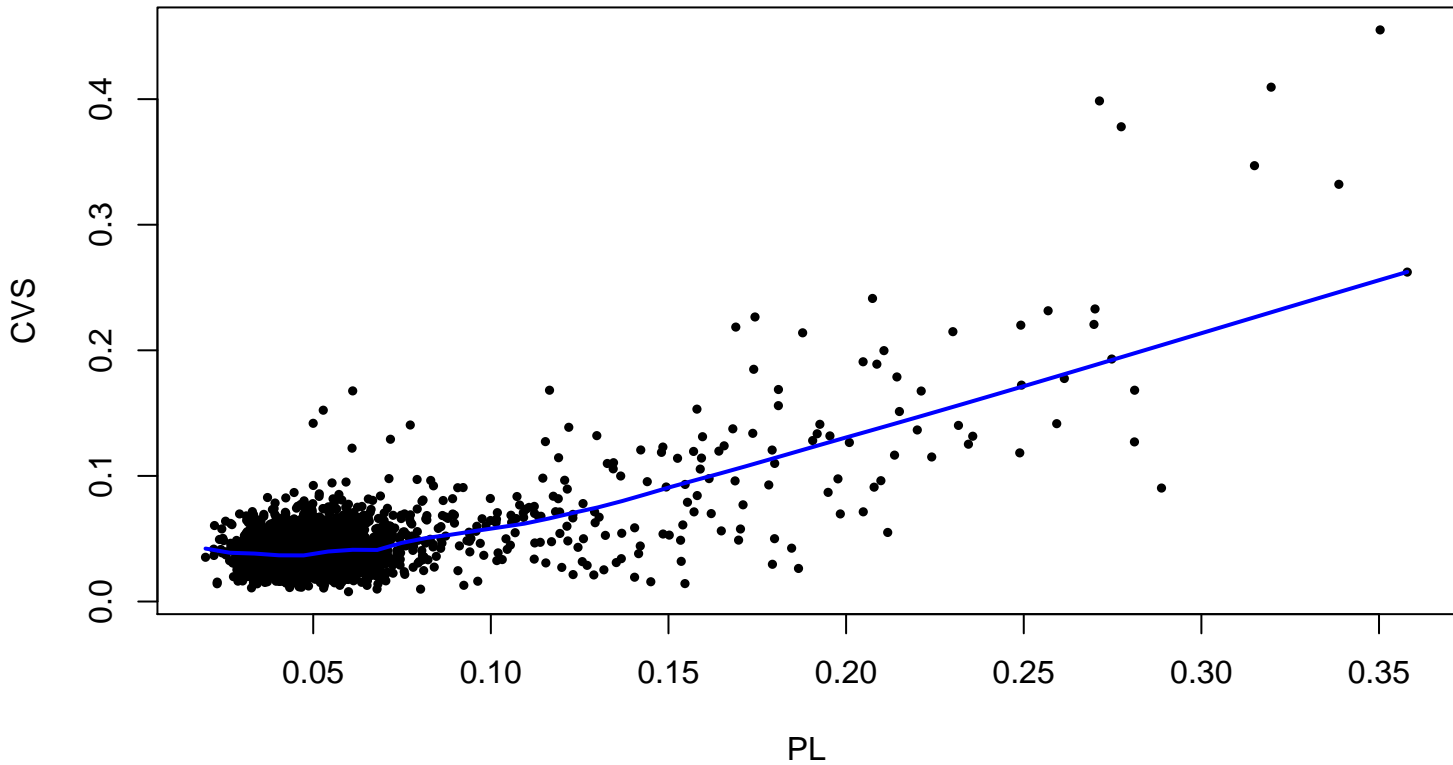

# Chr9

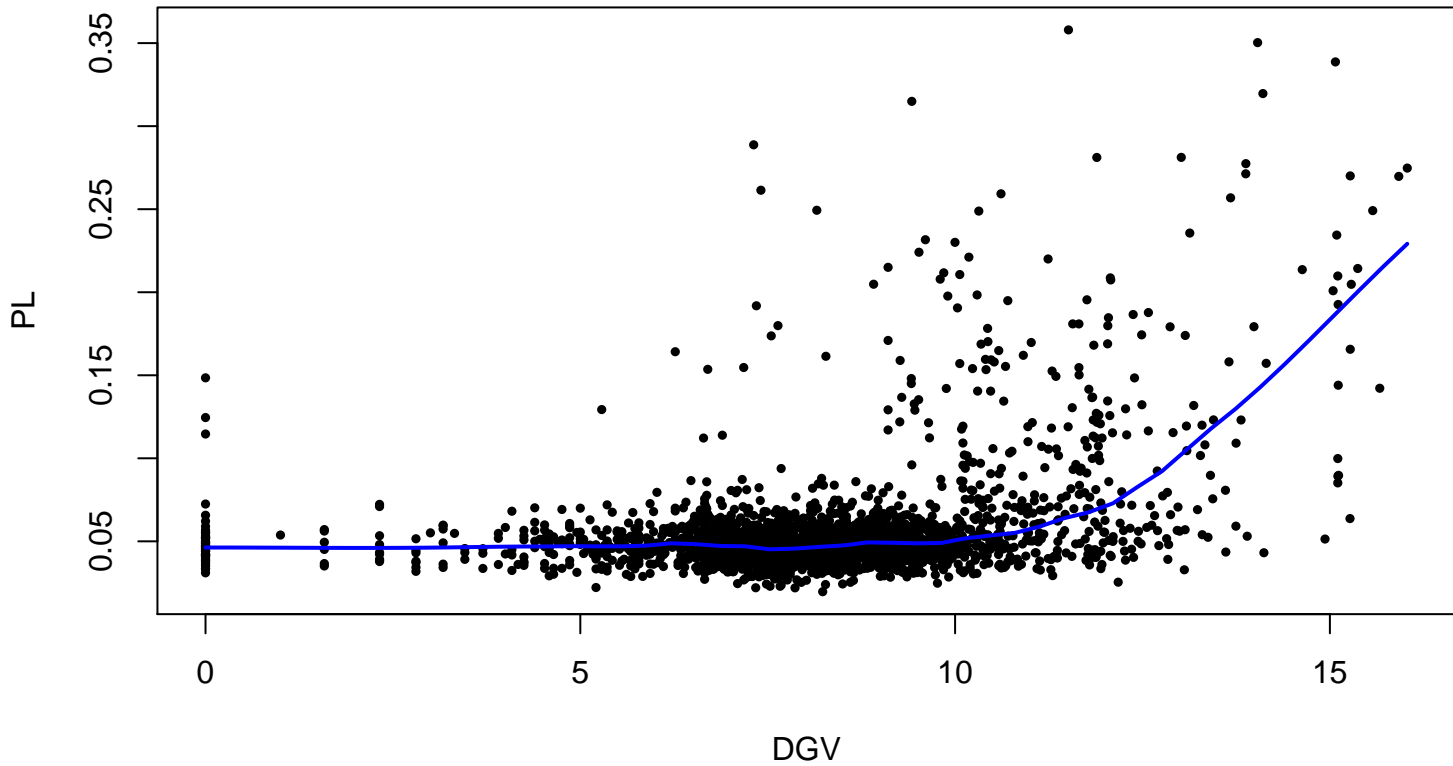

# Chr9

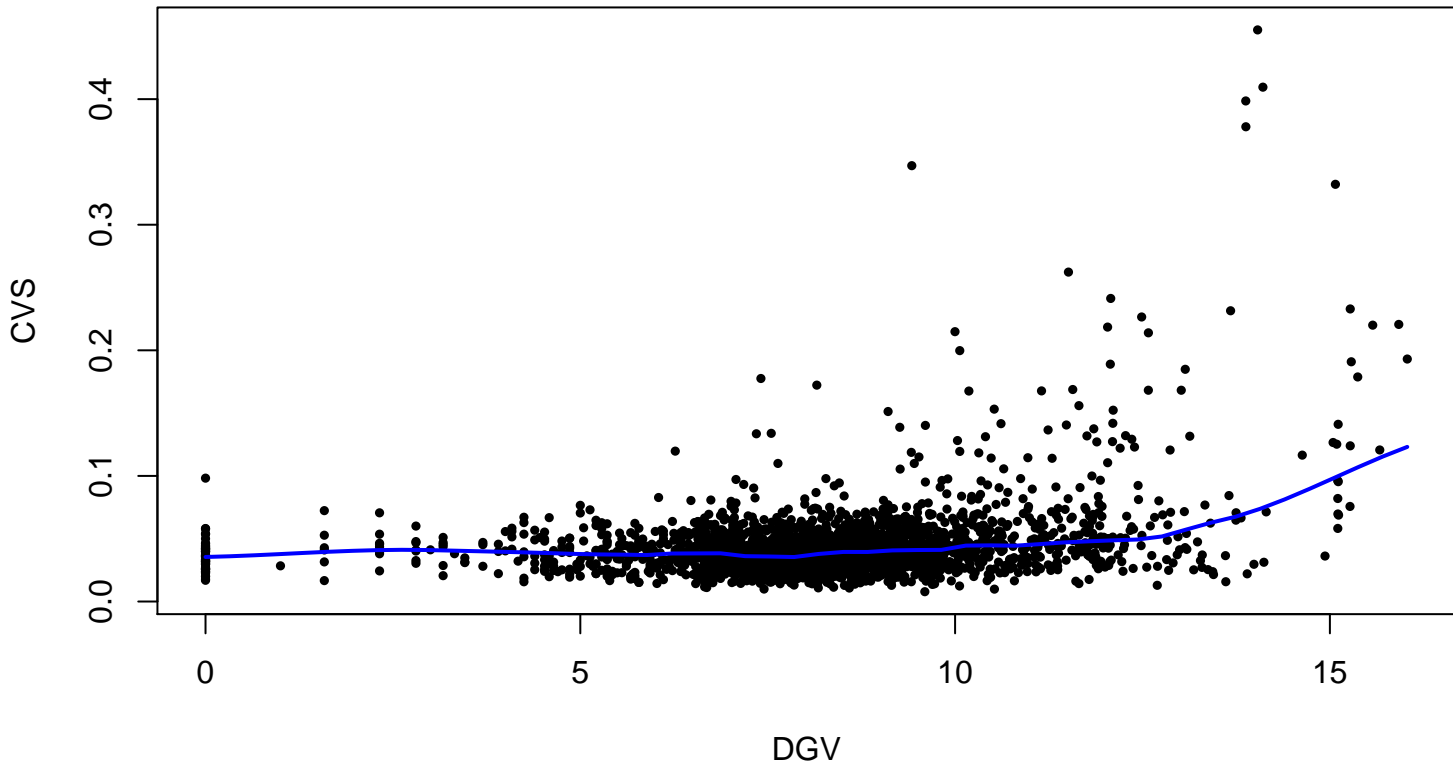

# Chr10

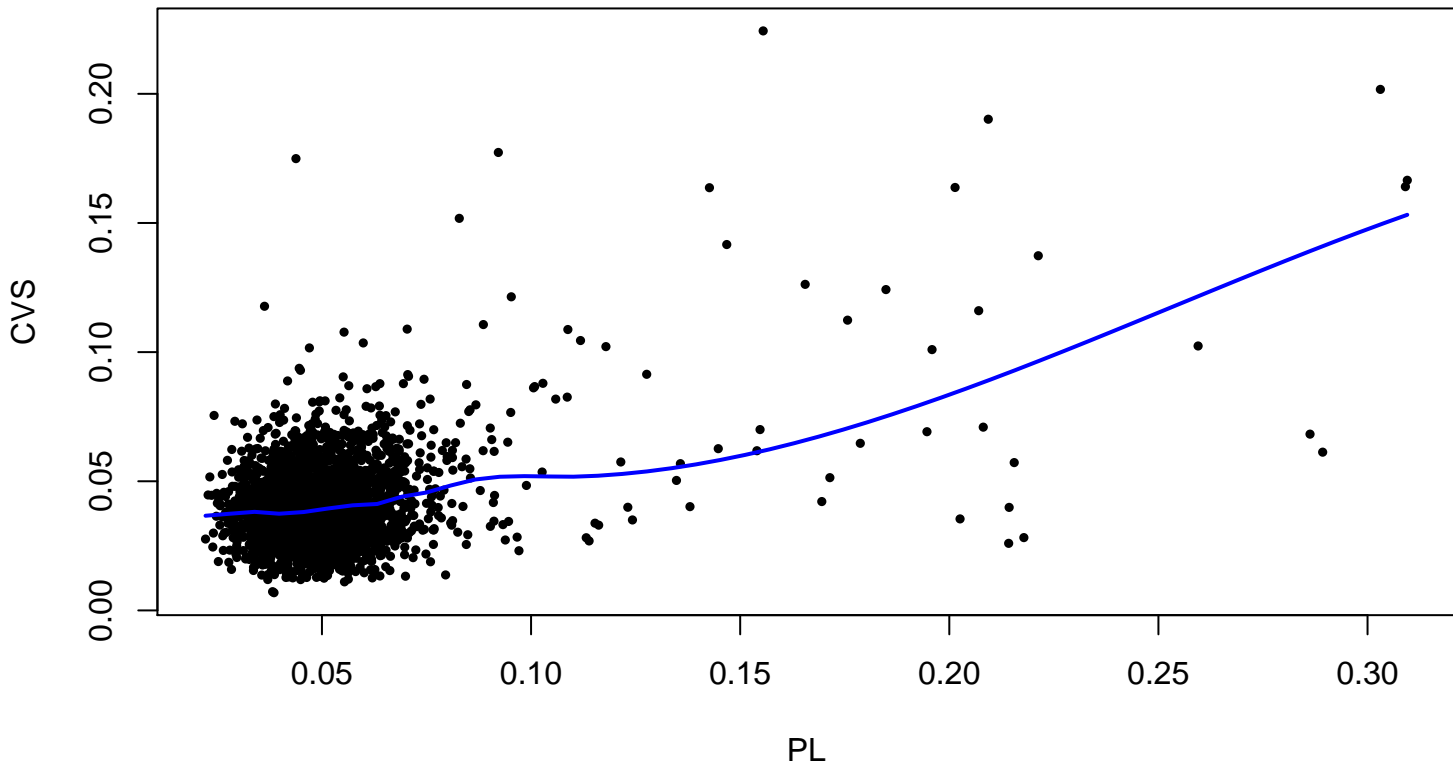

# Chr10

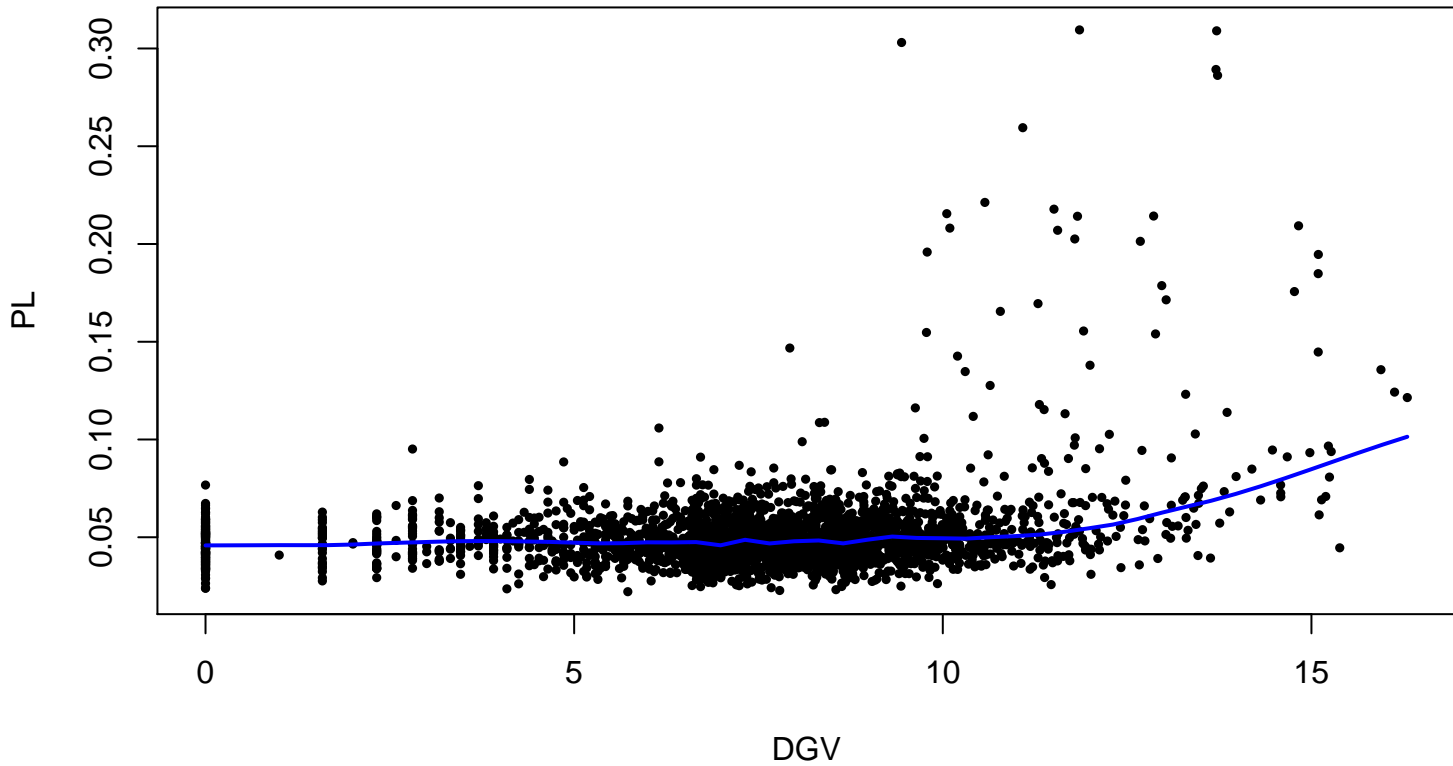

# Chr10

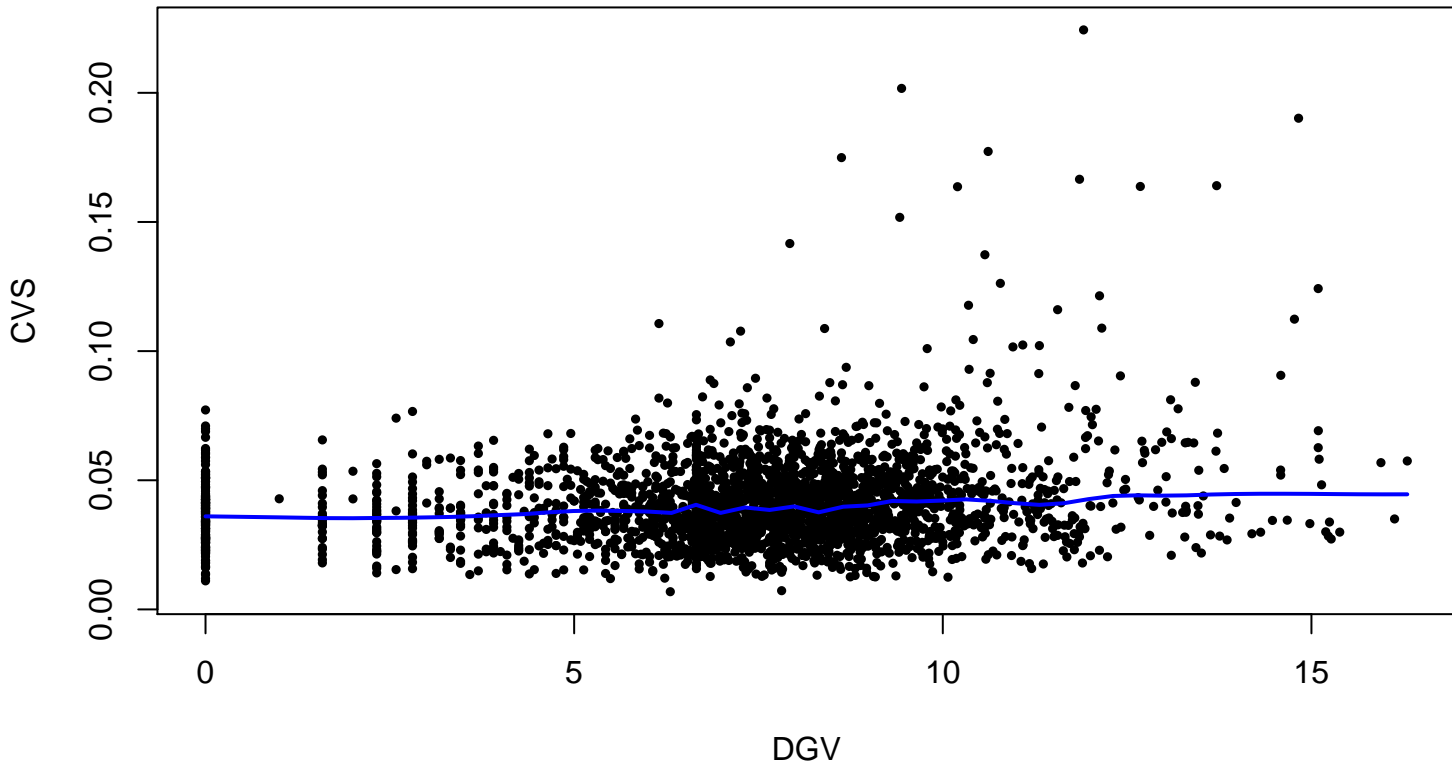

# Chr11

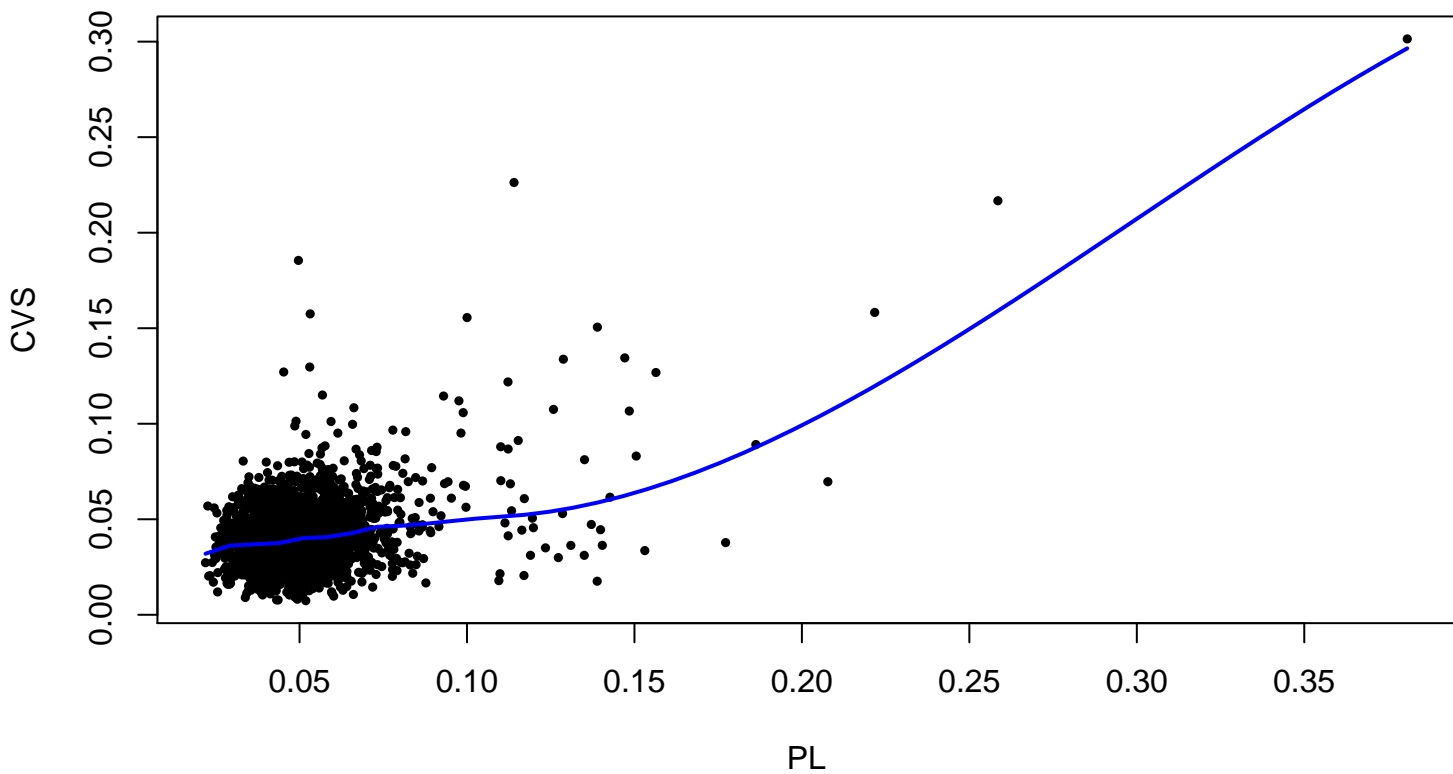

# Chr11

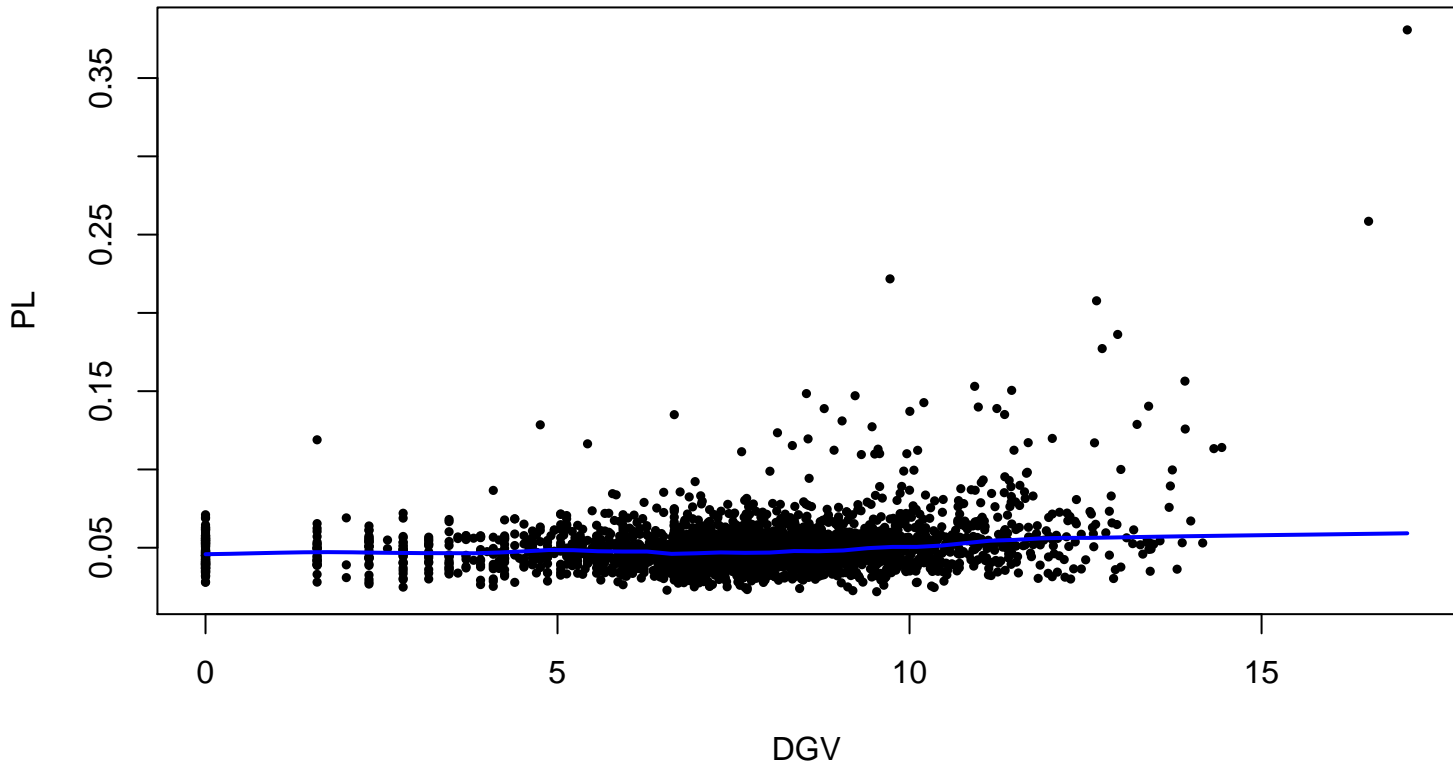



# Chr11

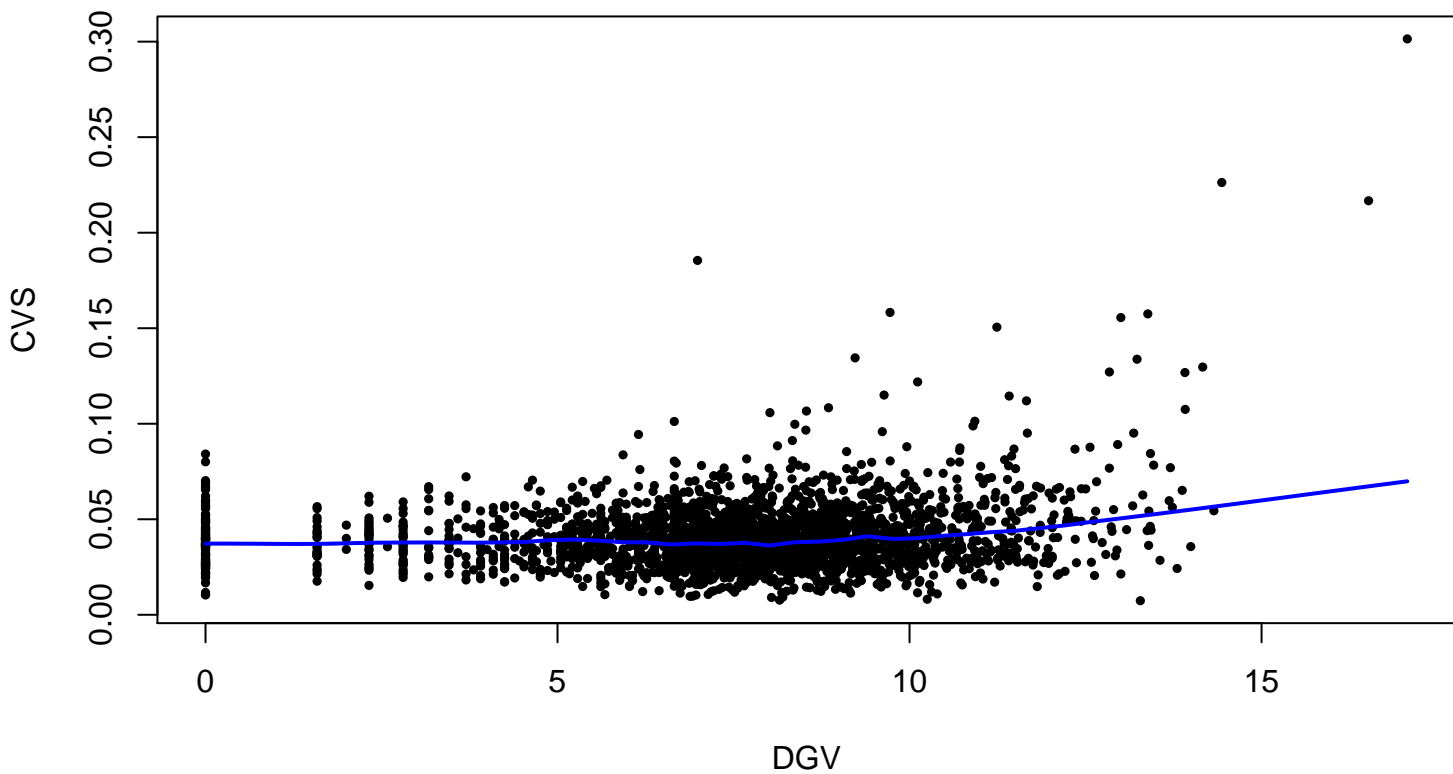

# Chr12

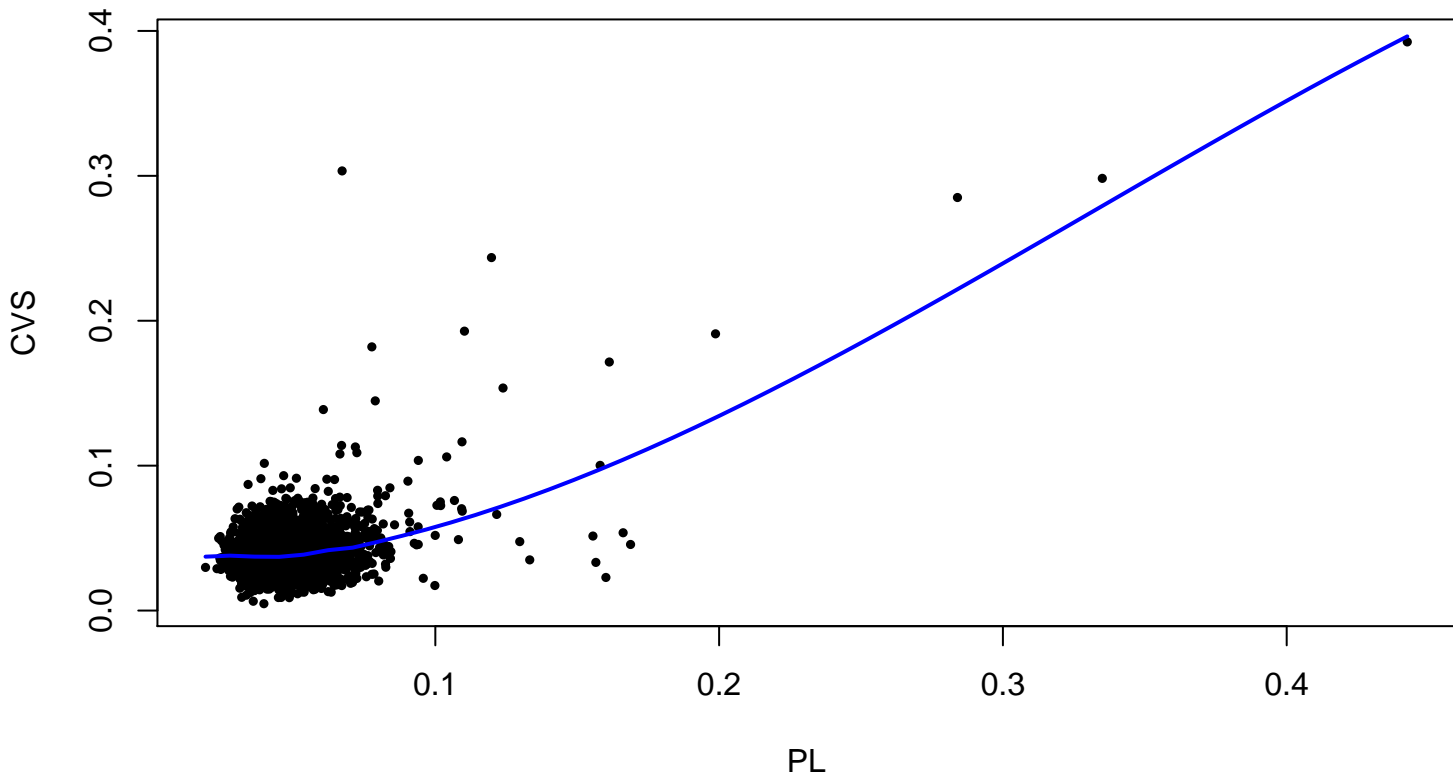

# Chr12

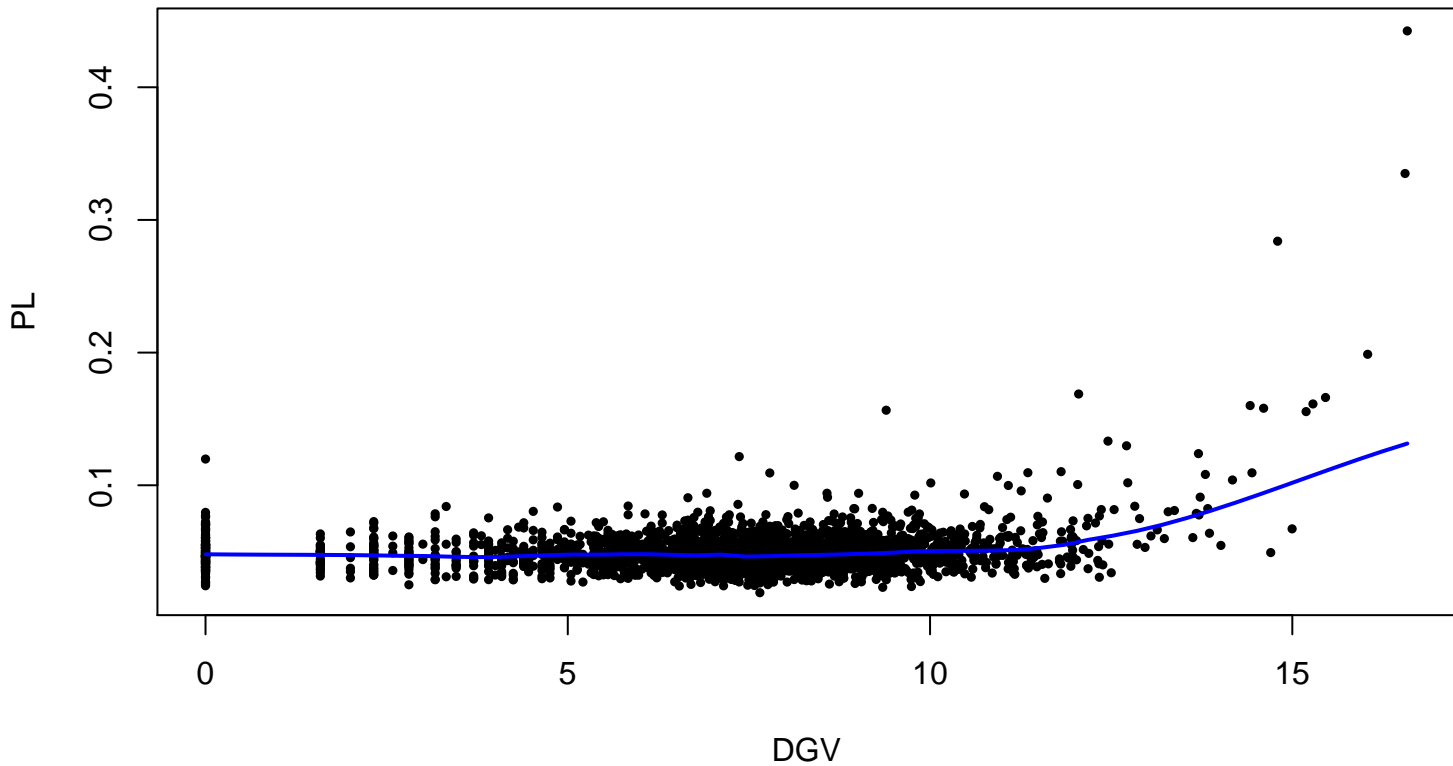

# Chr12

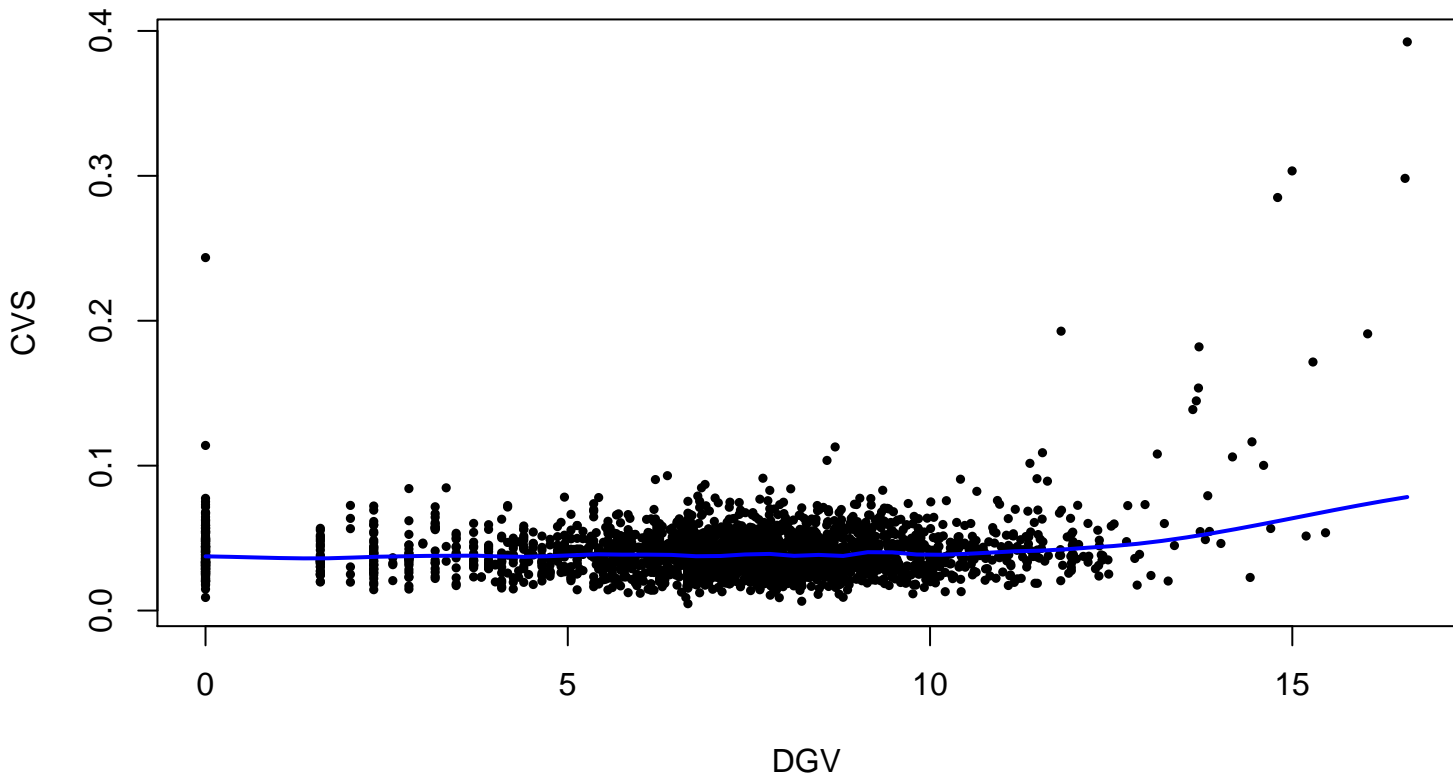

# Chr13

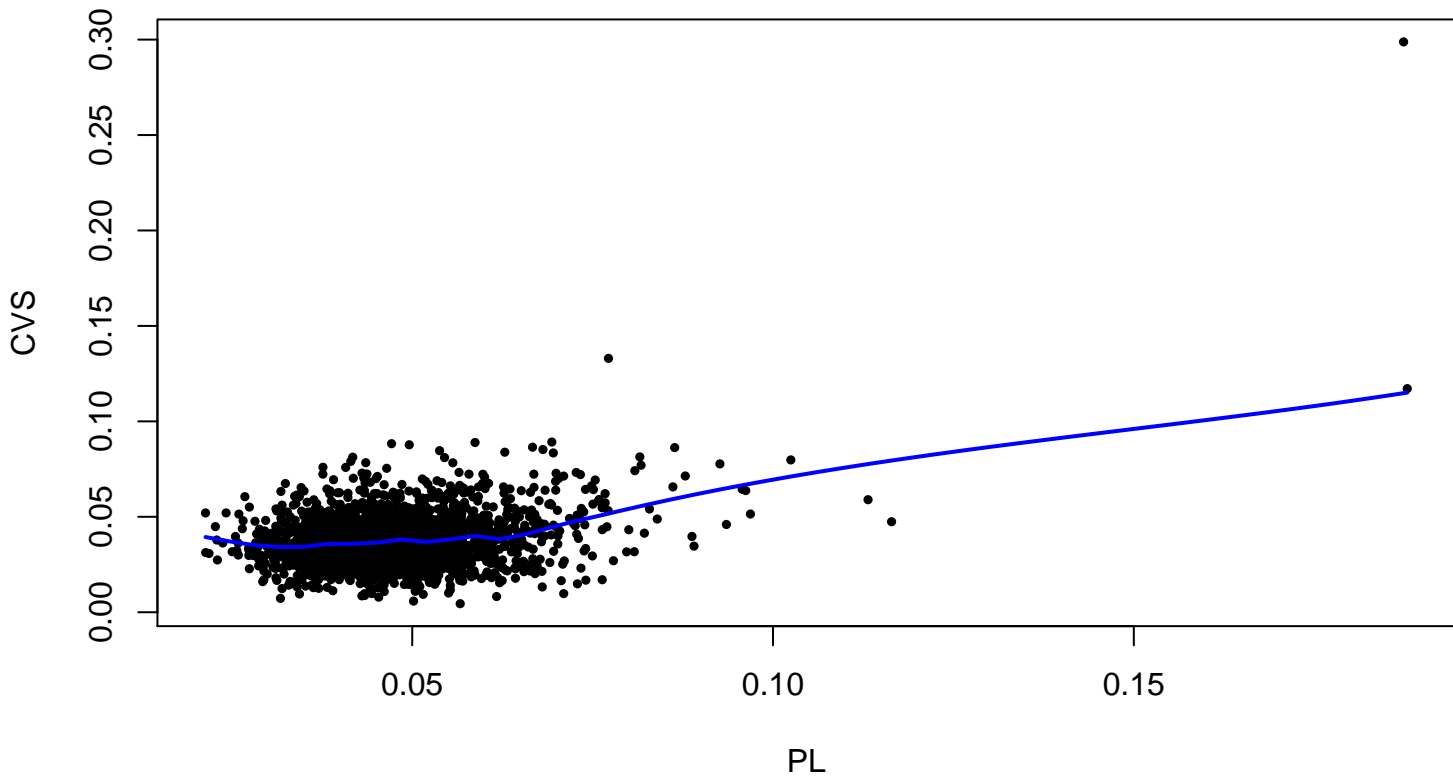

# Chr13

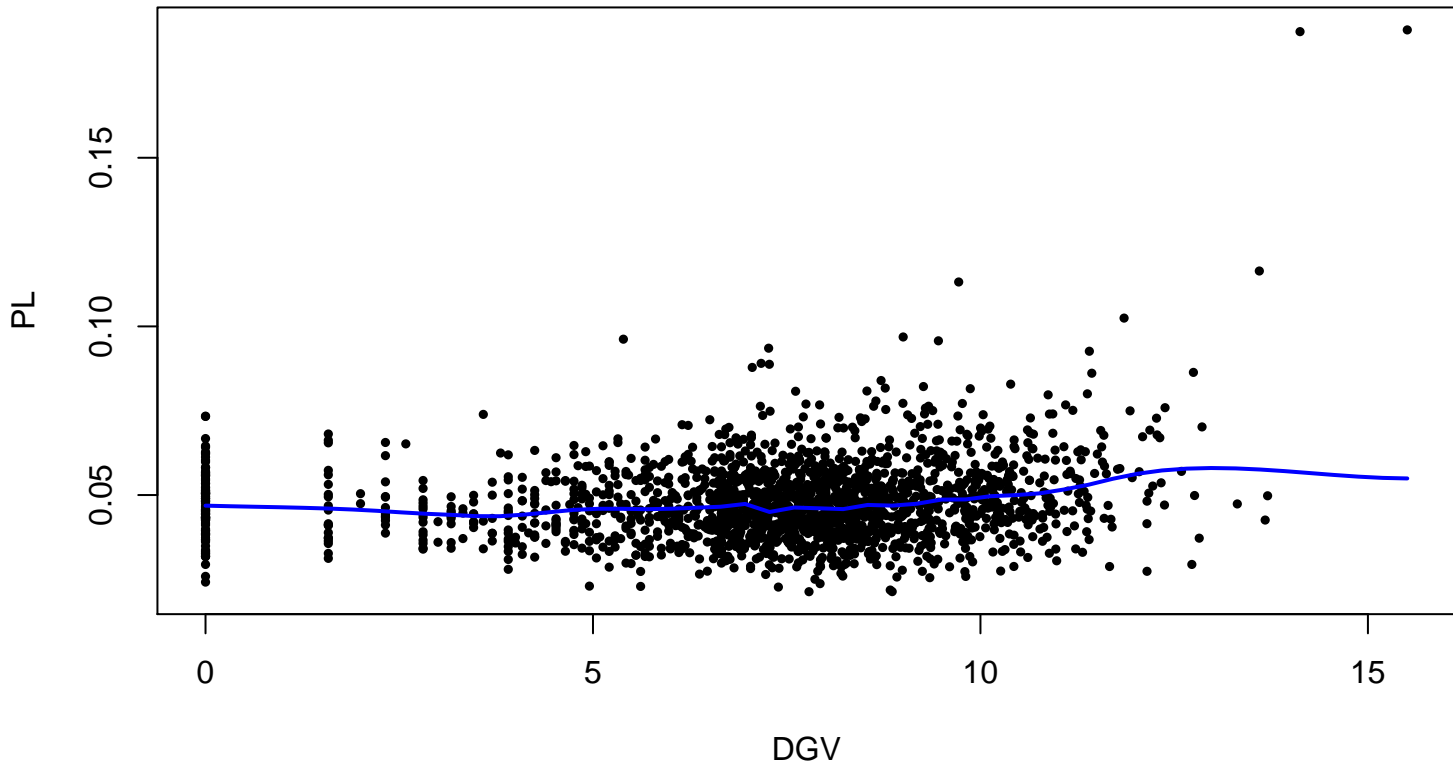

# Chr13

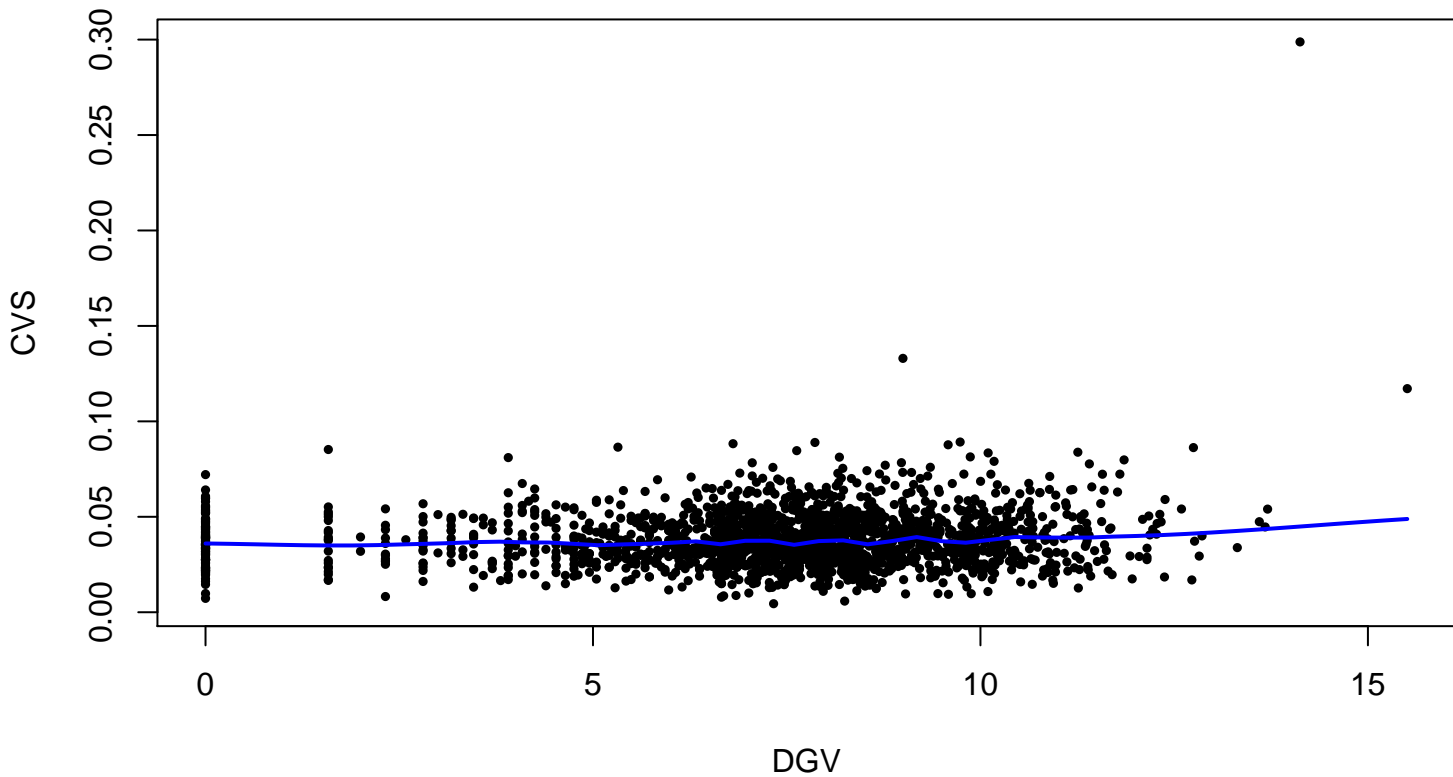

# Chr14

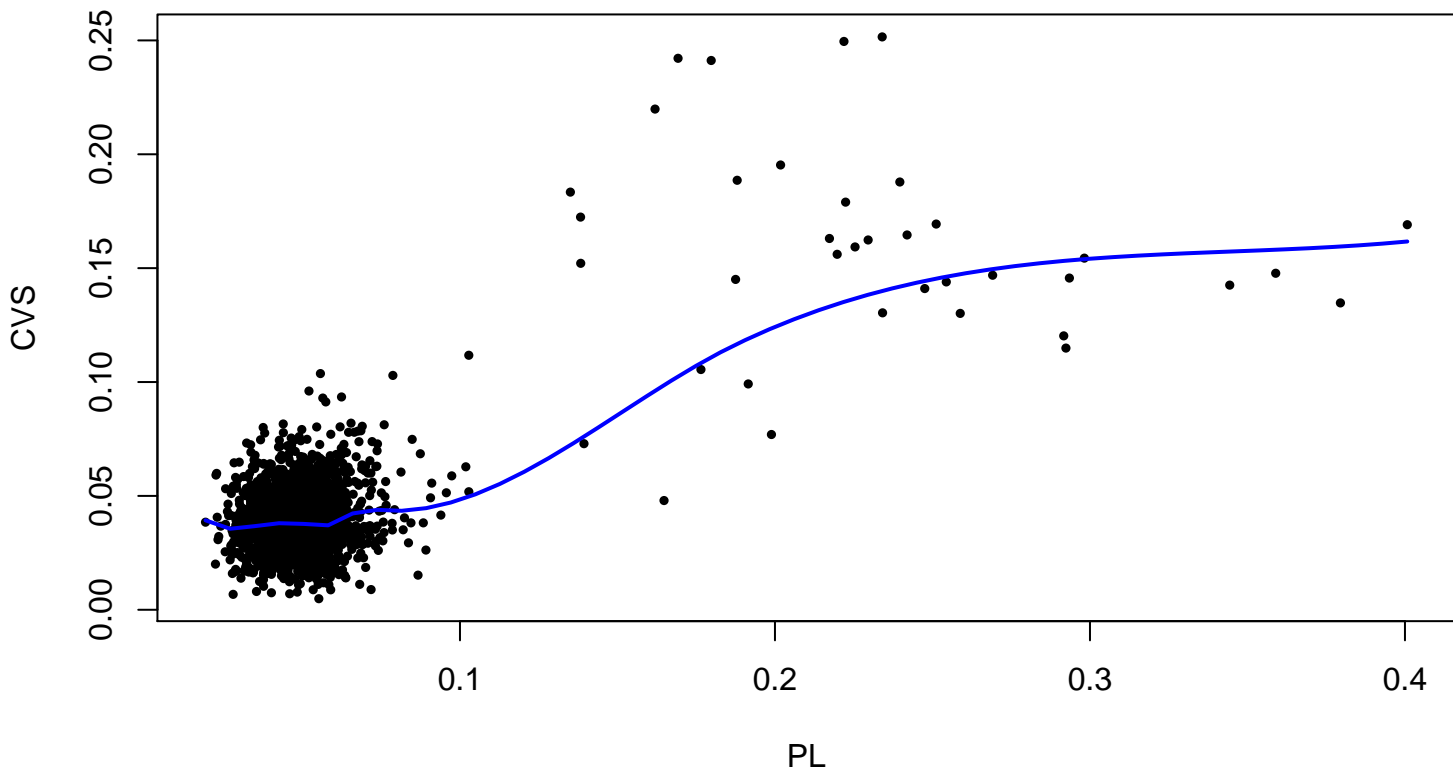



# Chr14

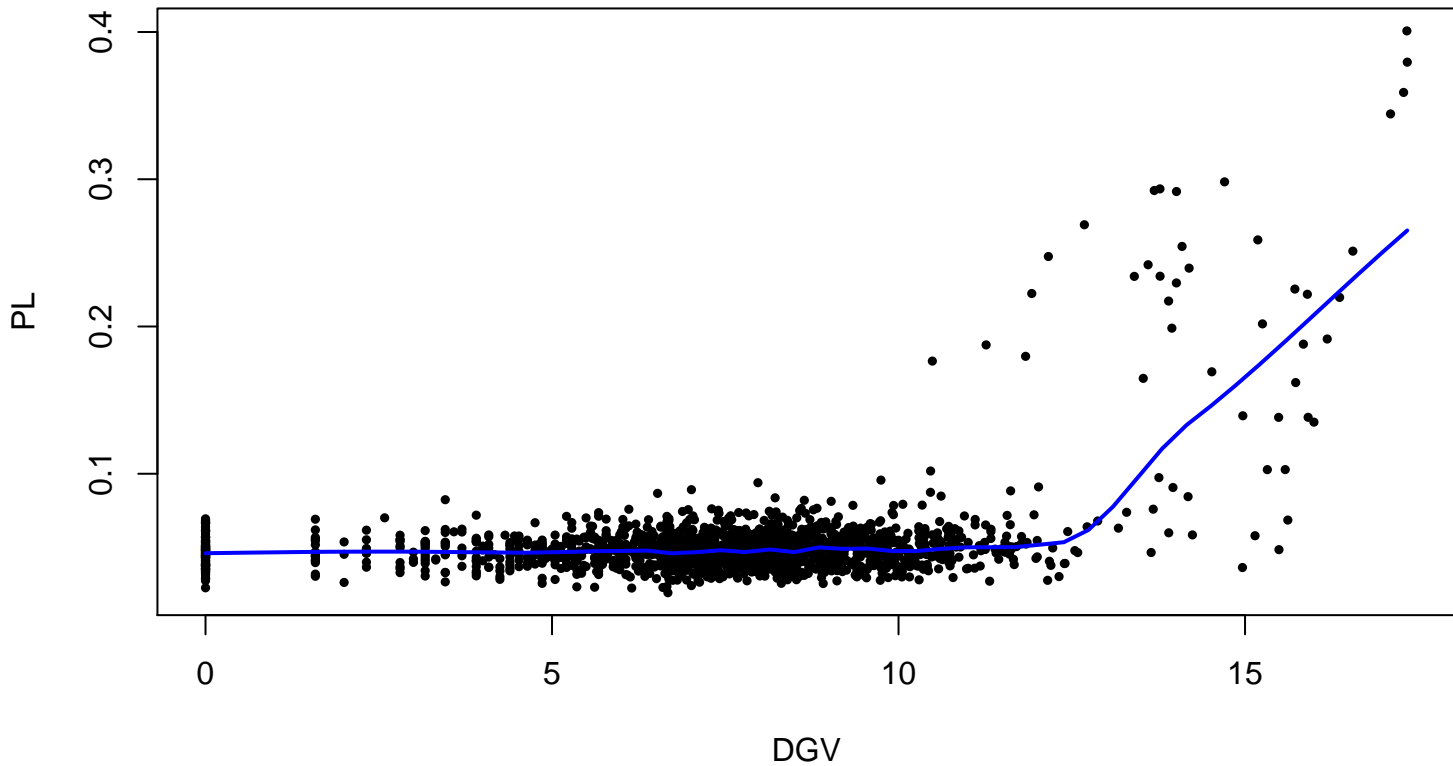

# Chr14

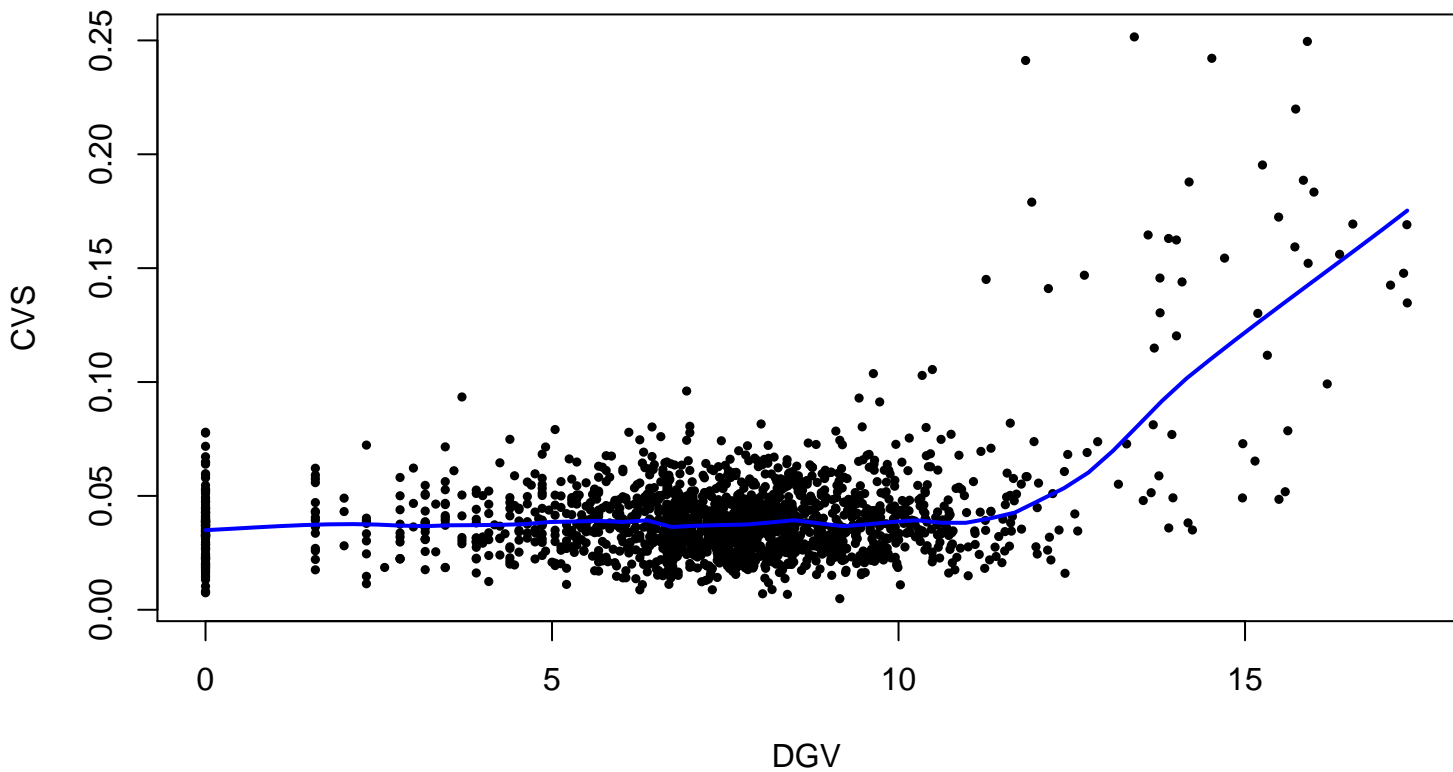

# Chr15

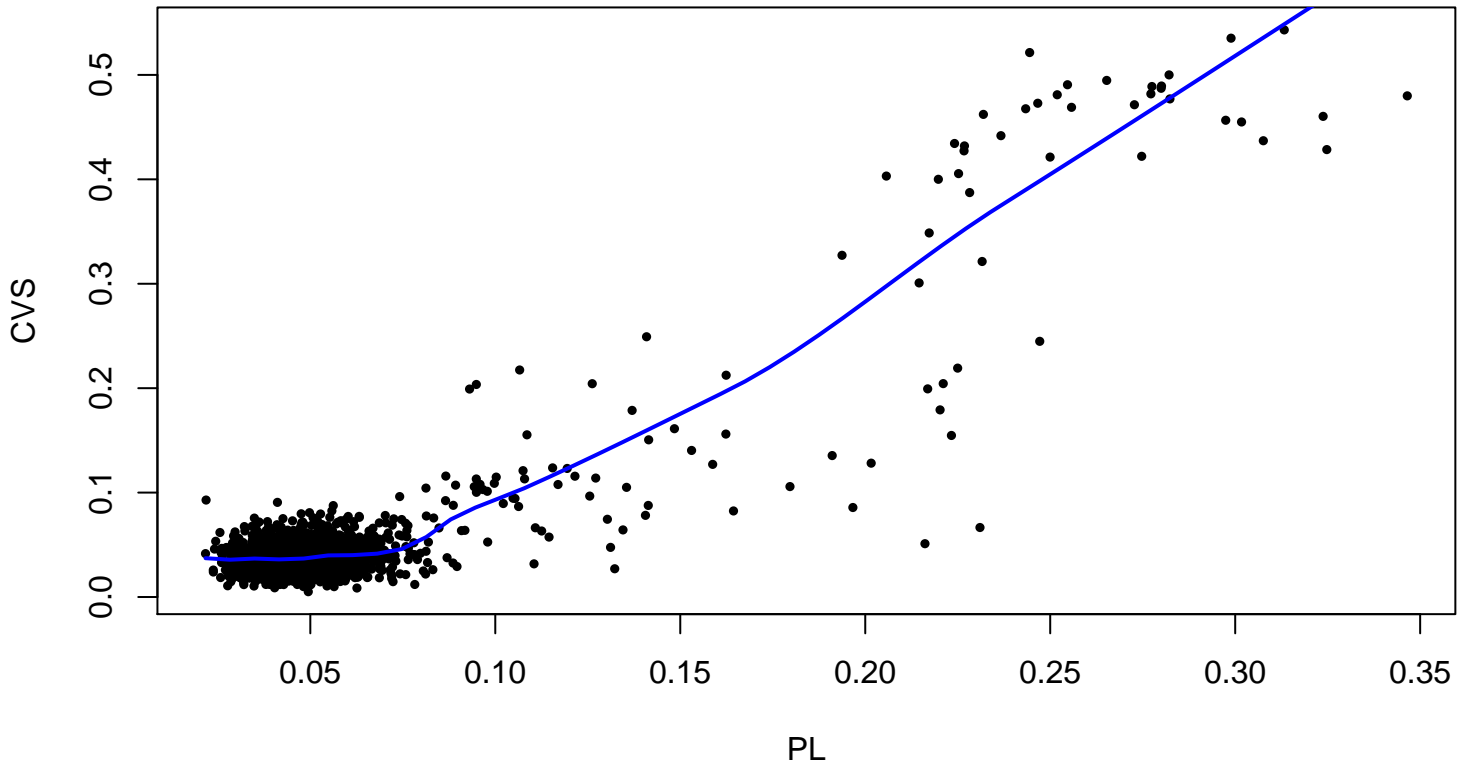

# Chr15

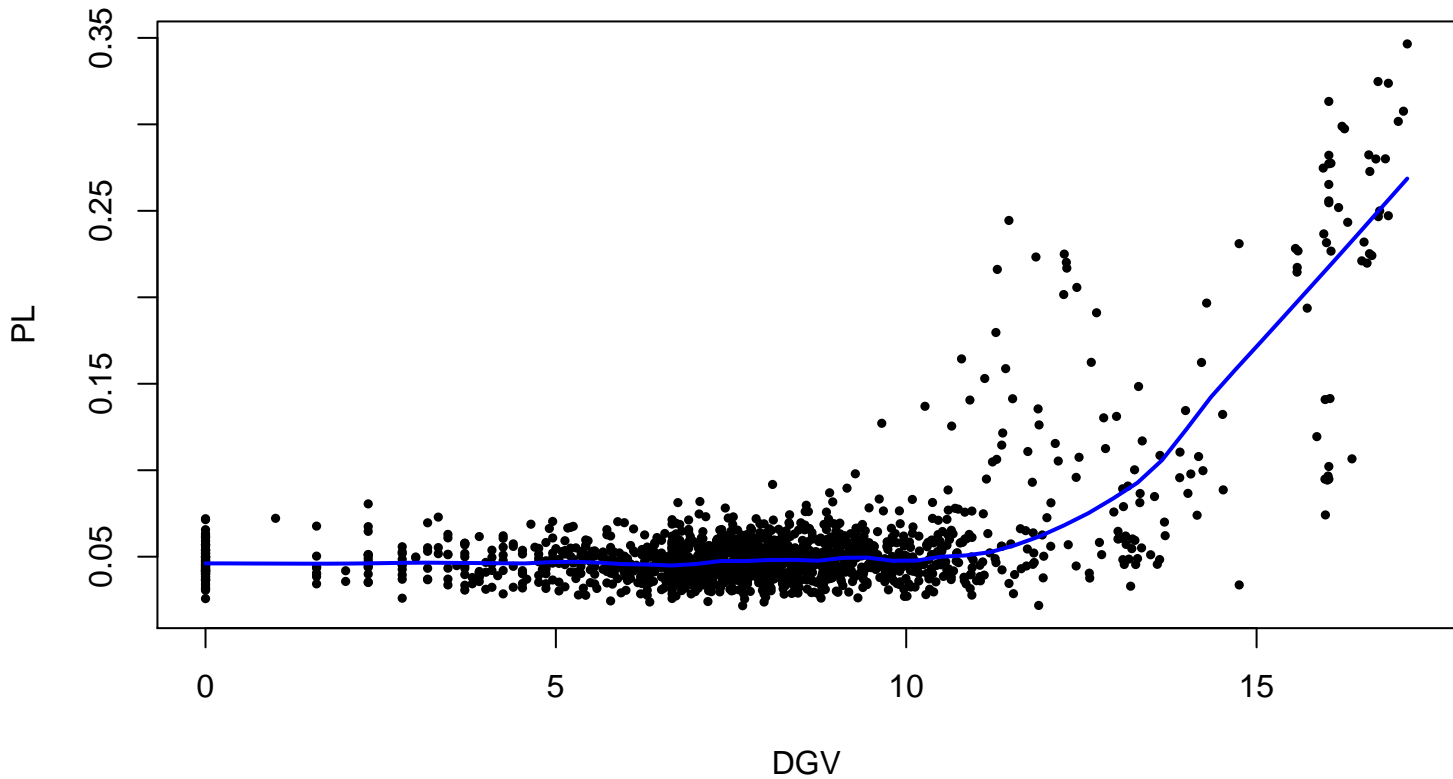

# Chr15

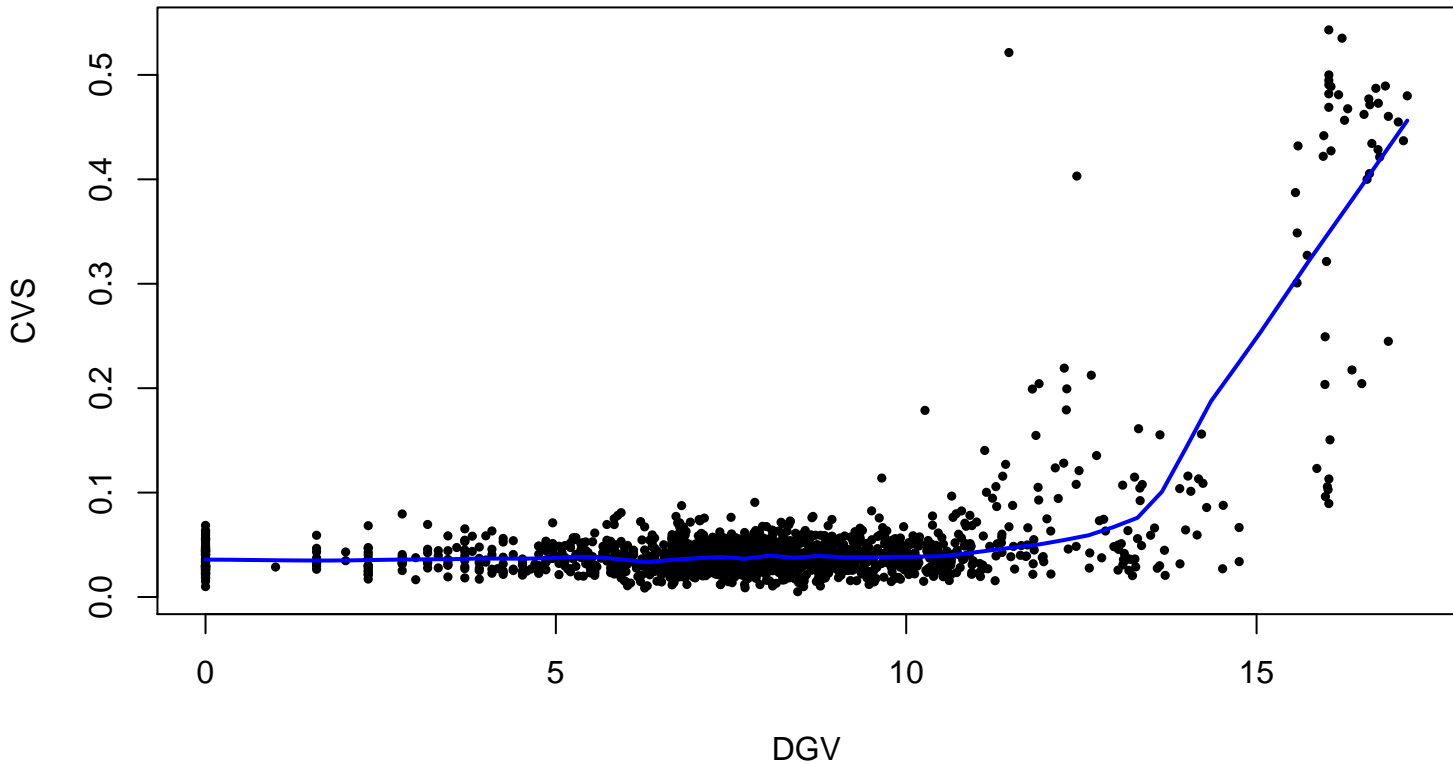

# Chr16

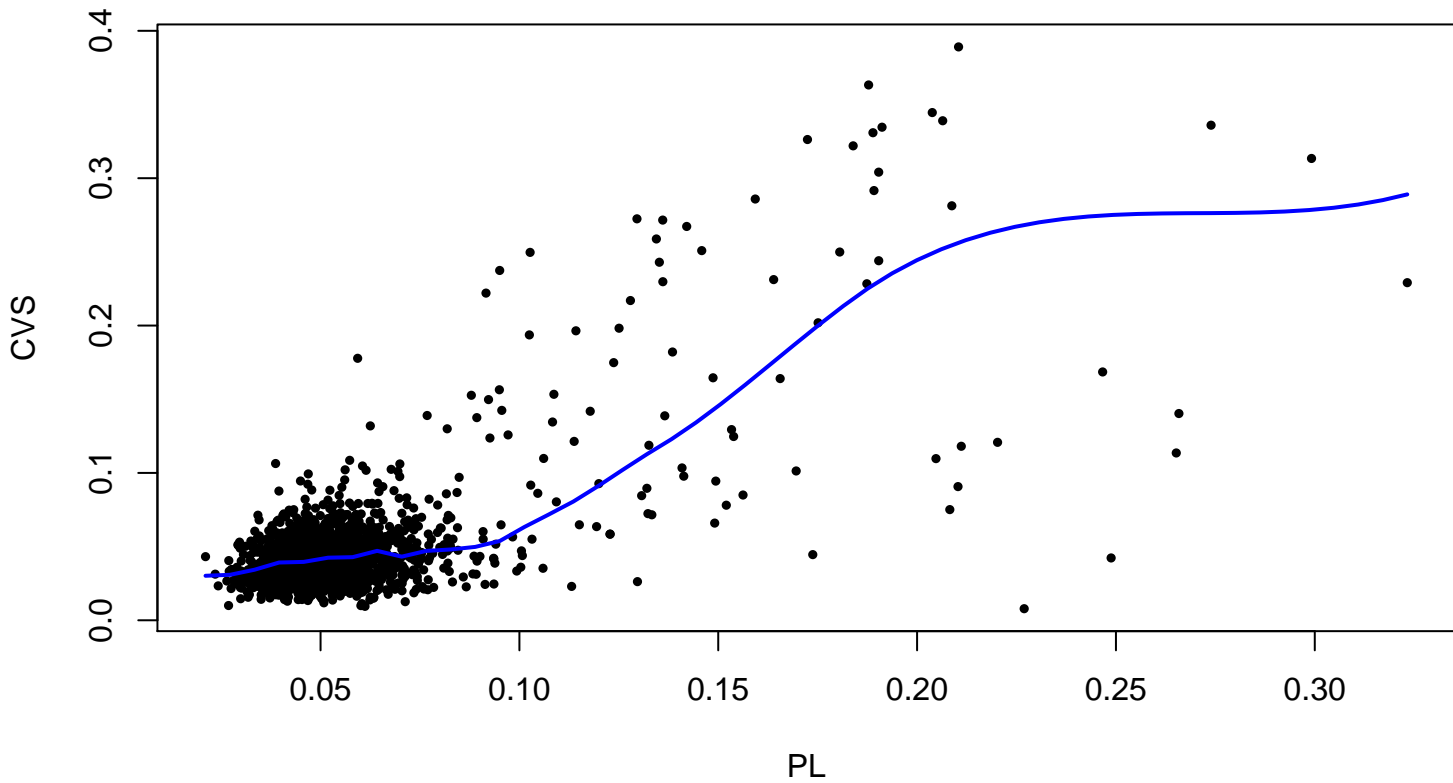

# Chr16

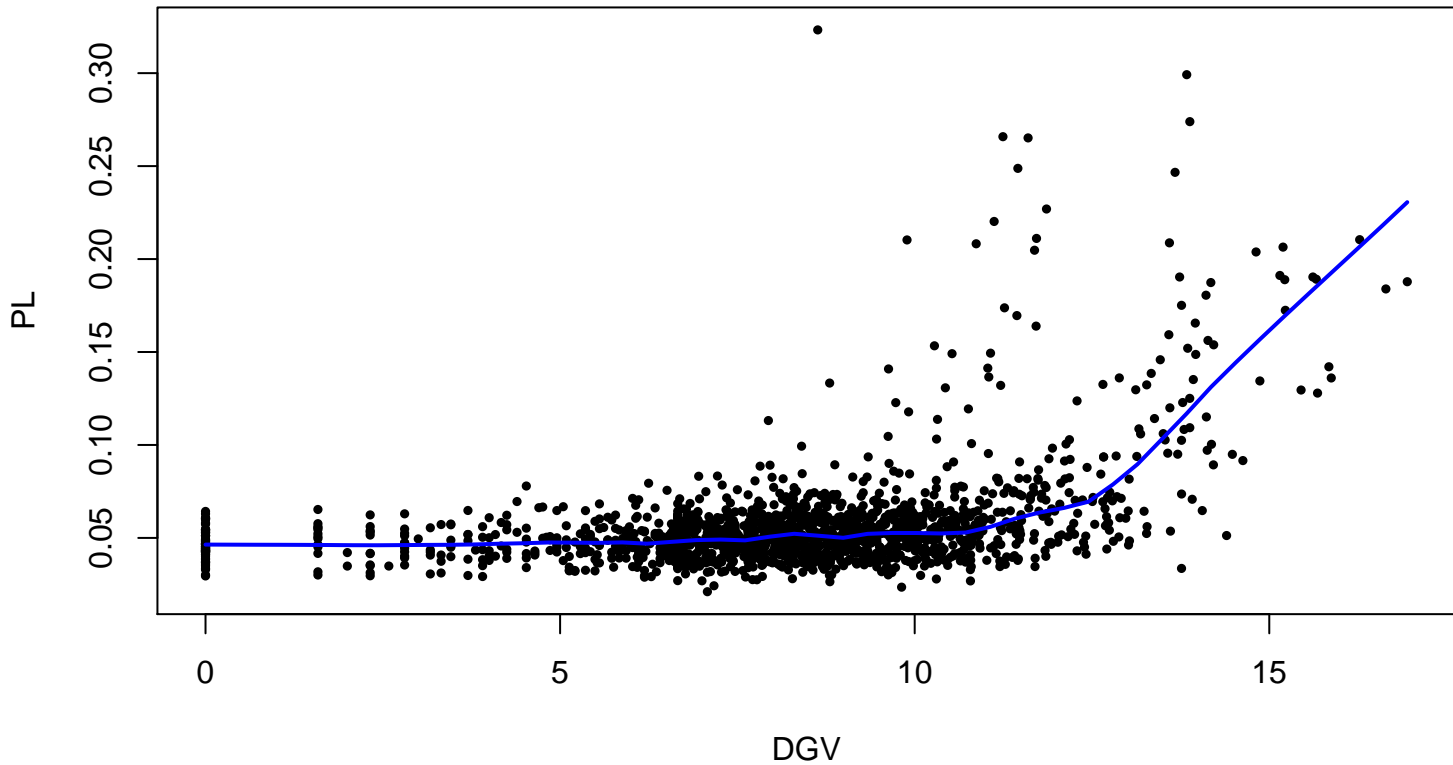

# Chr16

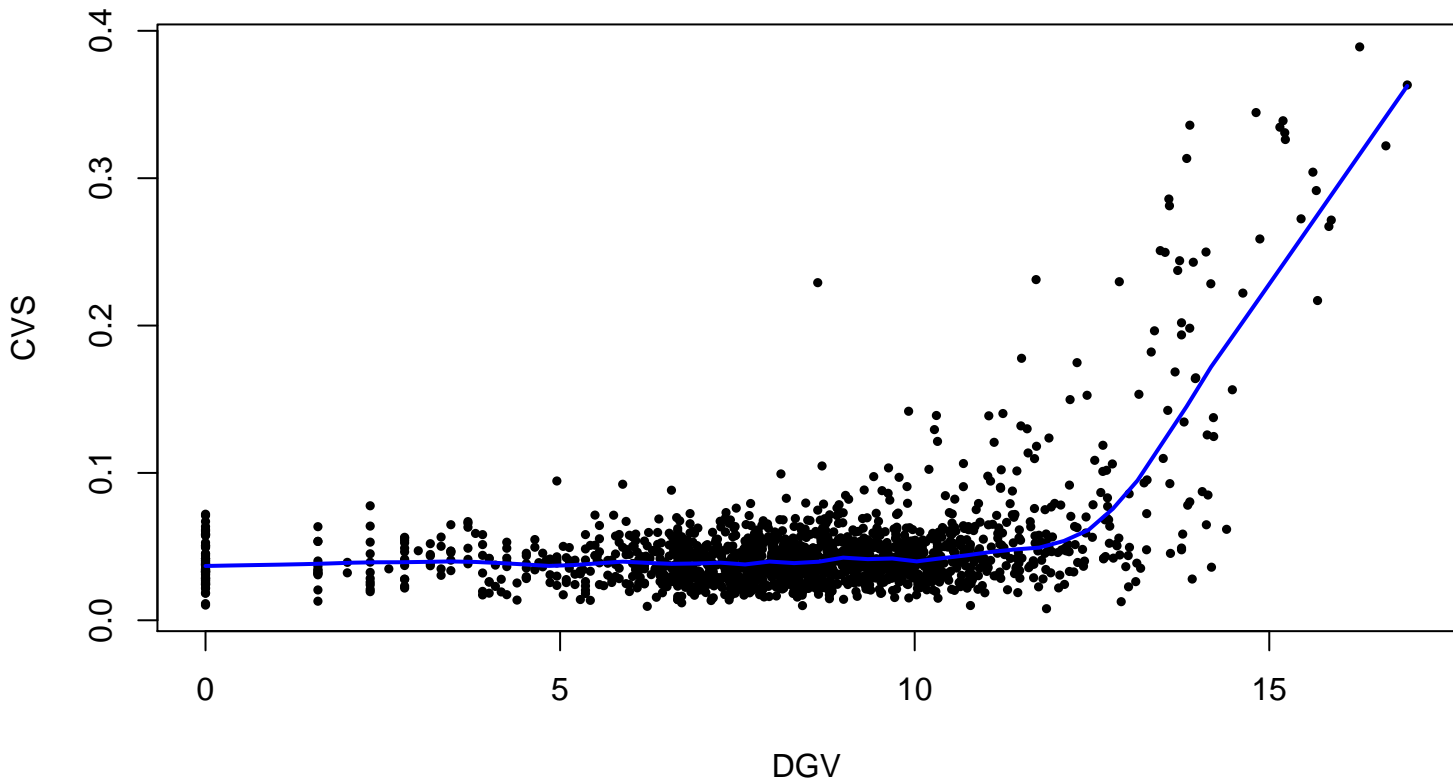



# Chr17

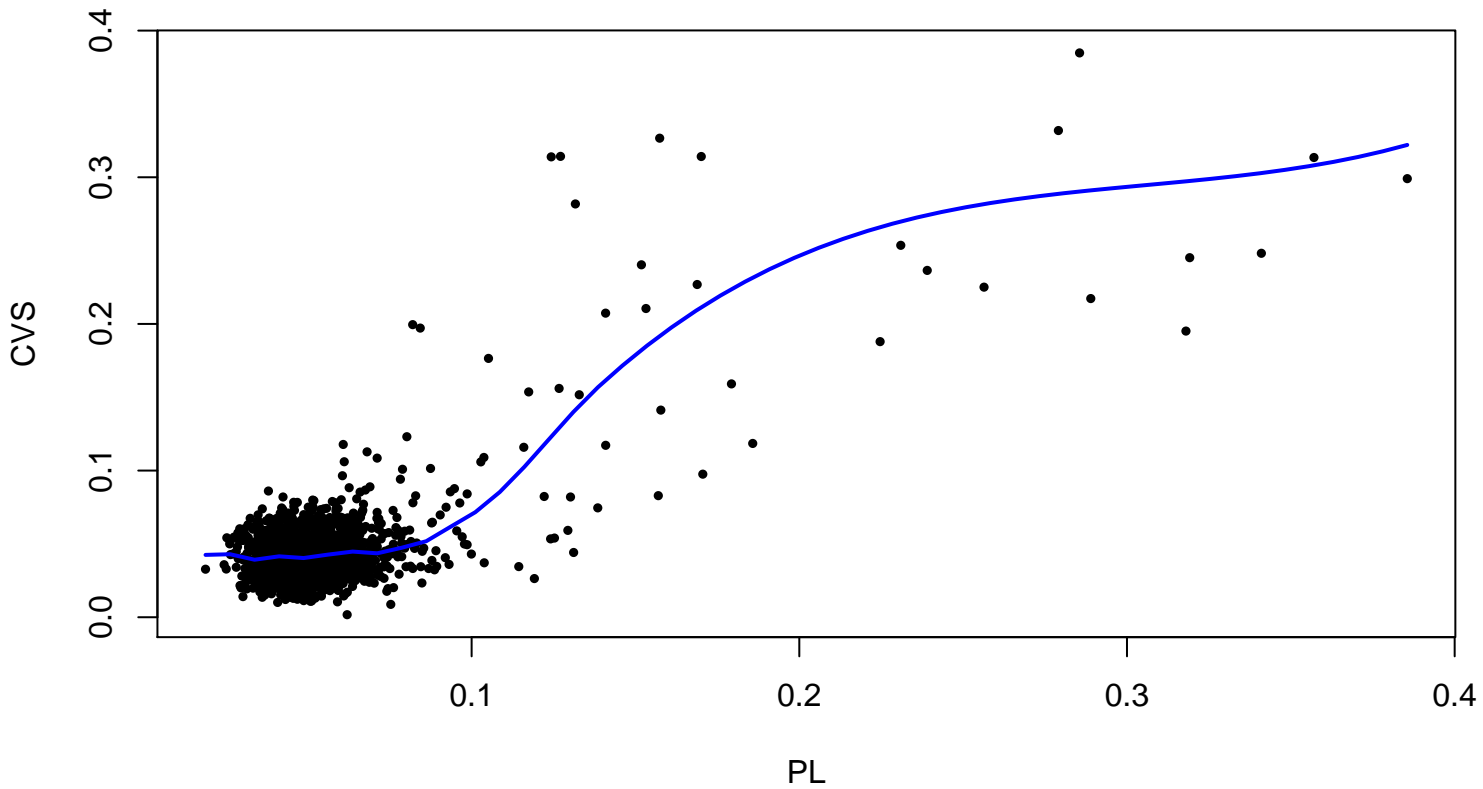

# Chr17

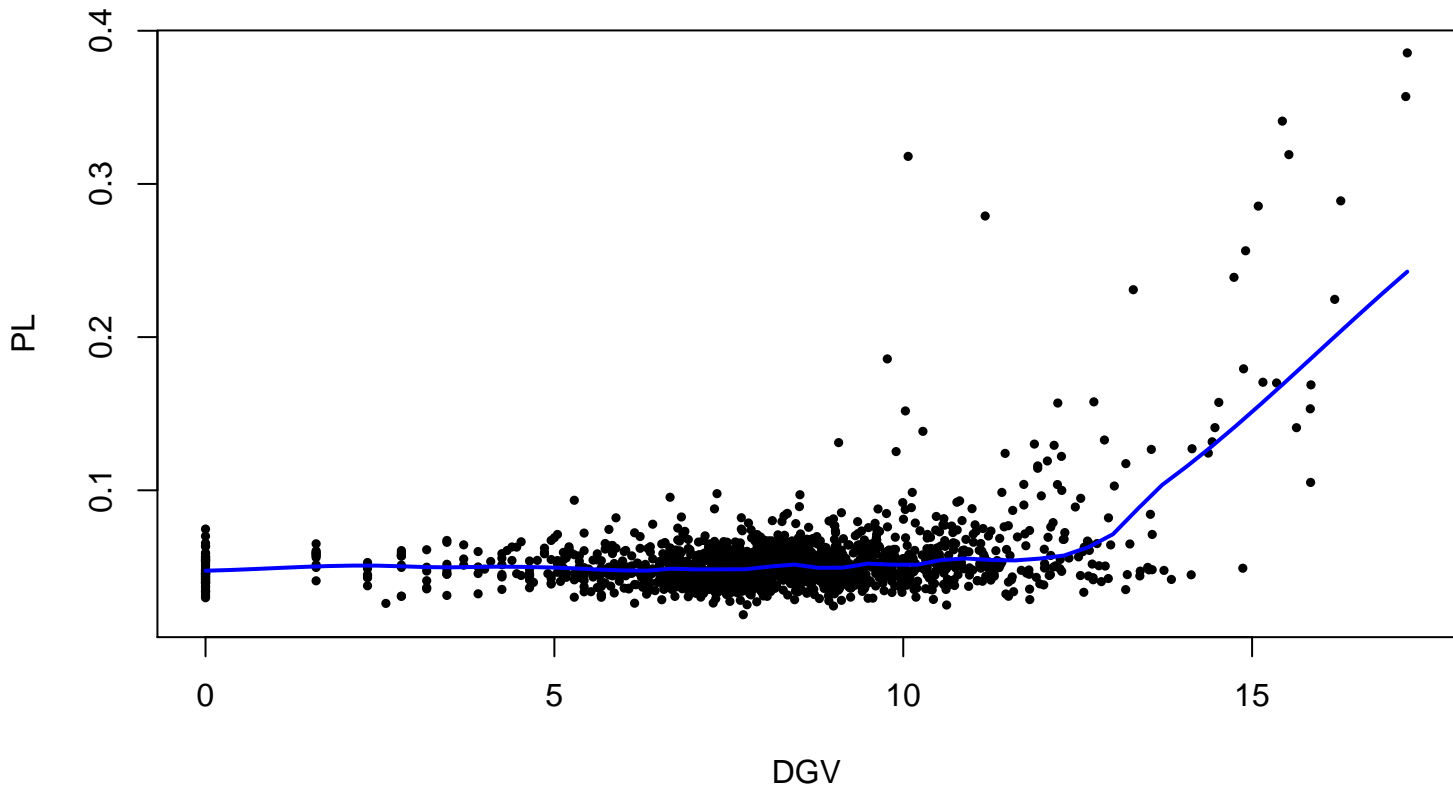

# Chr17

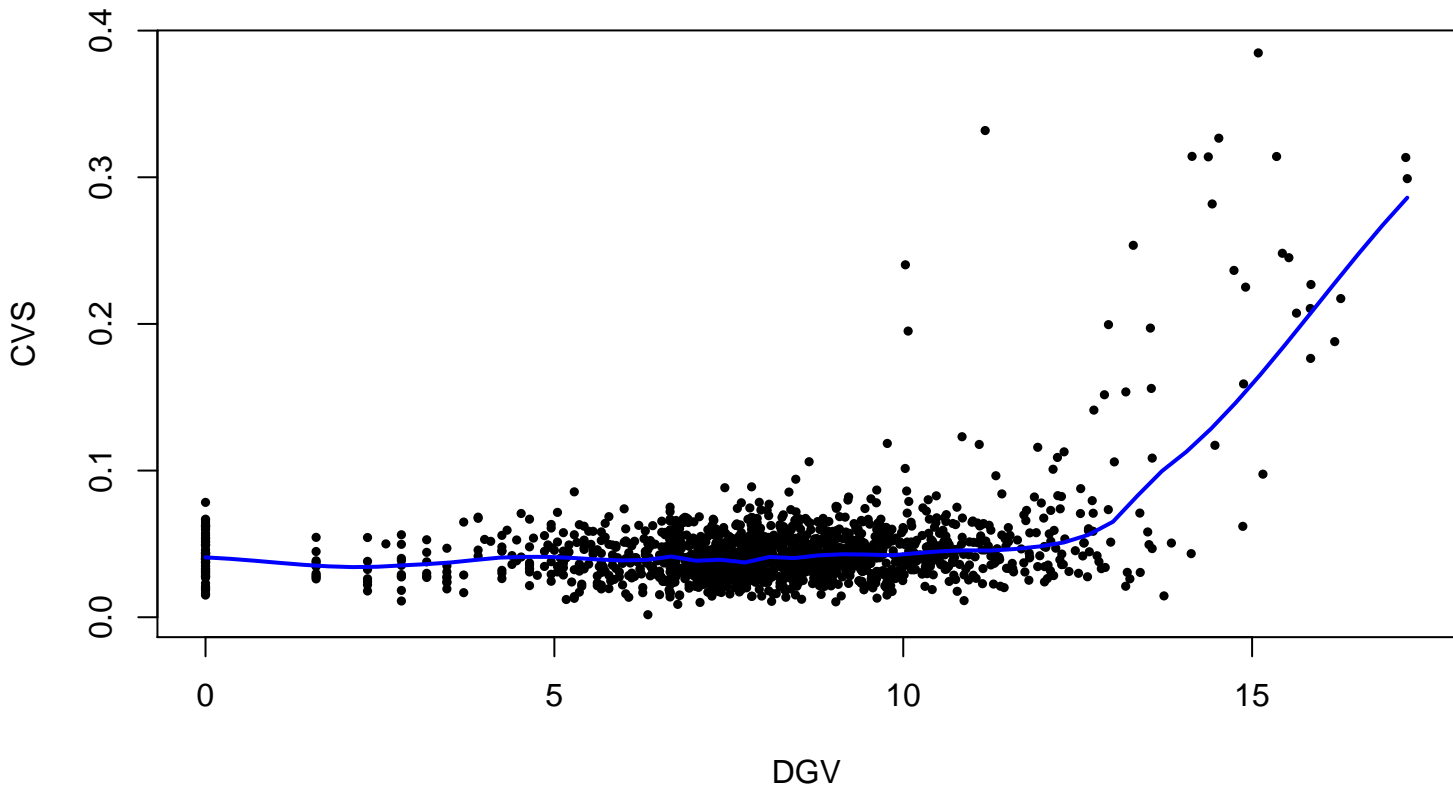

# Chr18

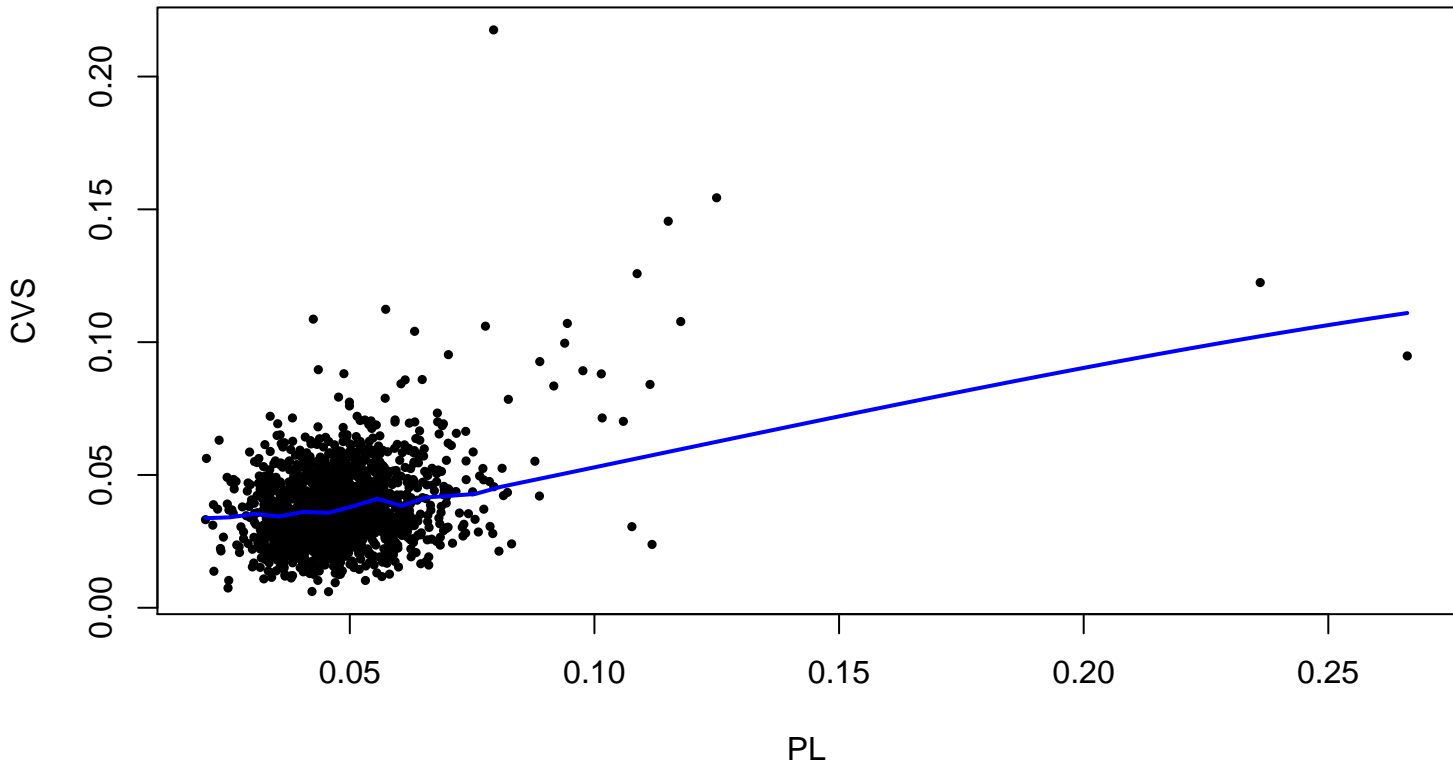

# Chr18

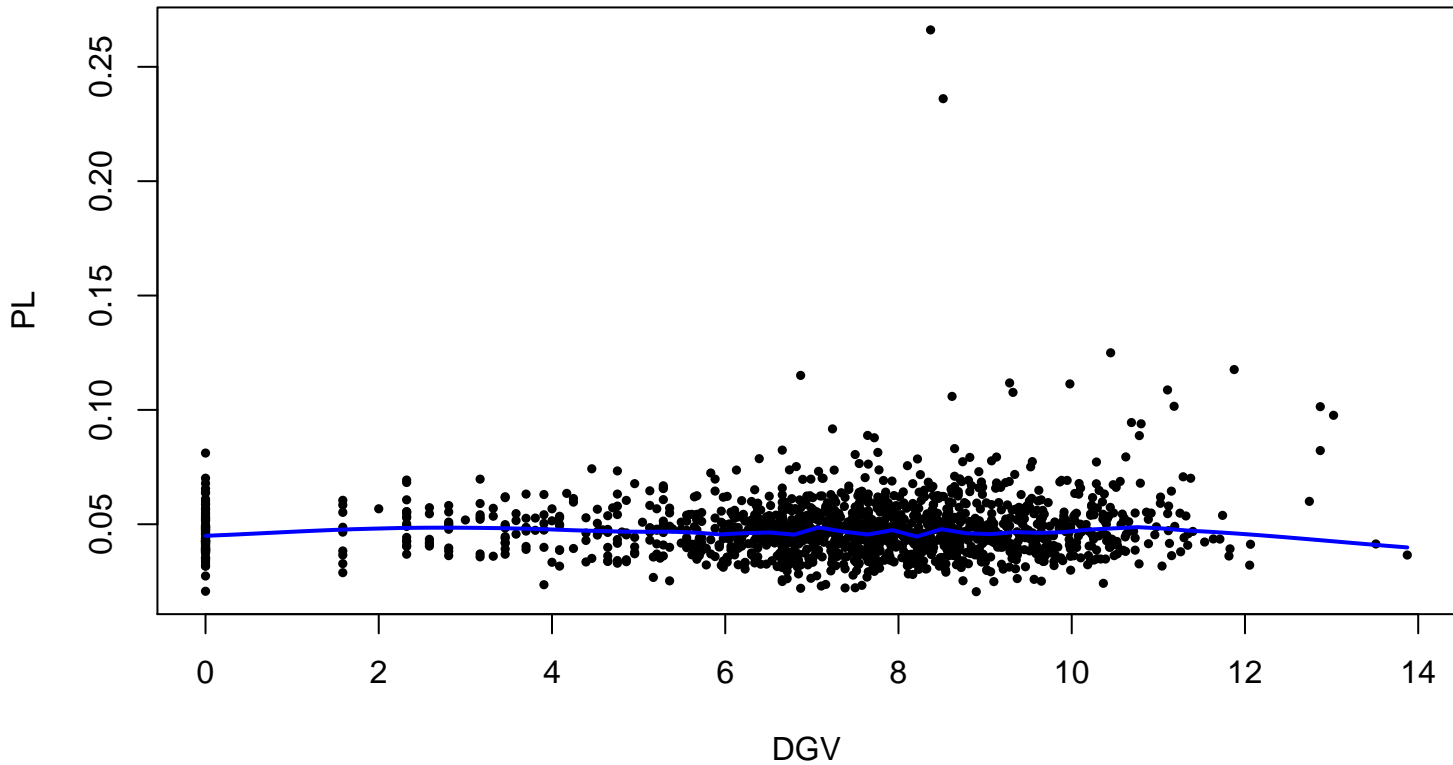

# Chr18

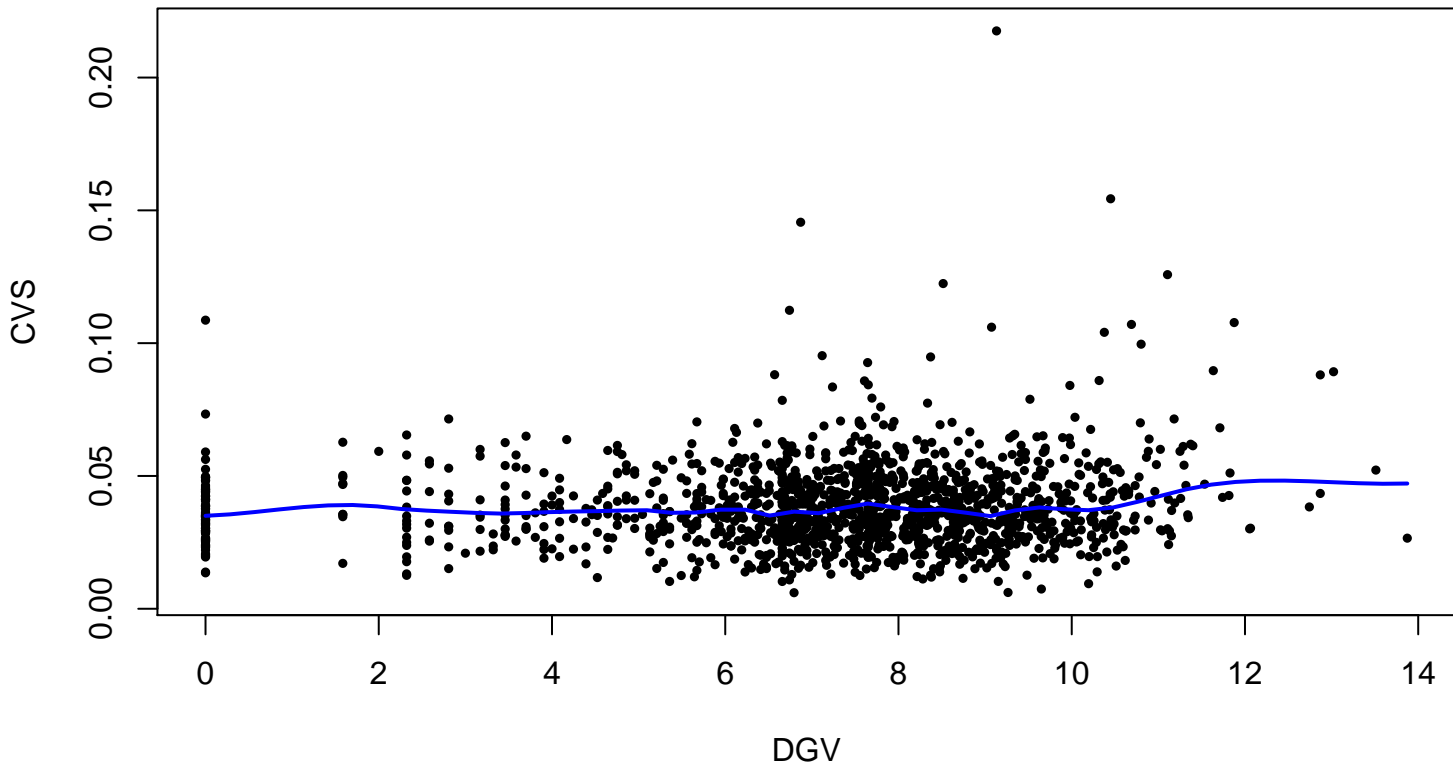

# Chr19

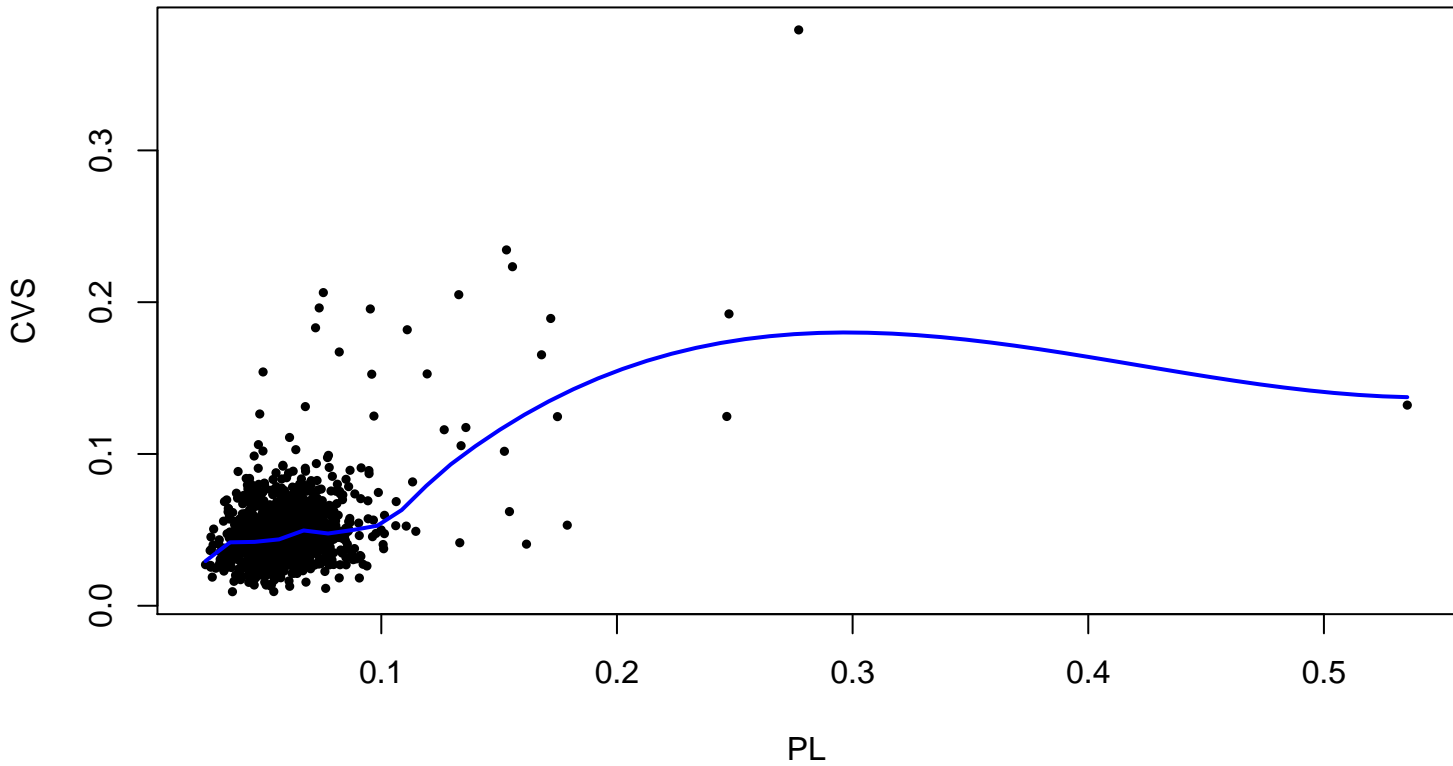

# Chr19

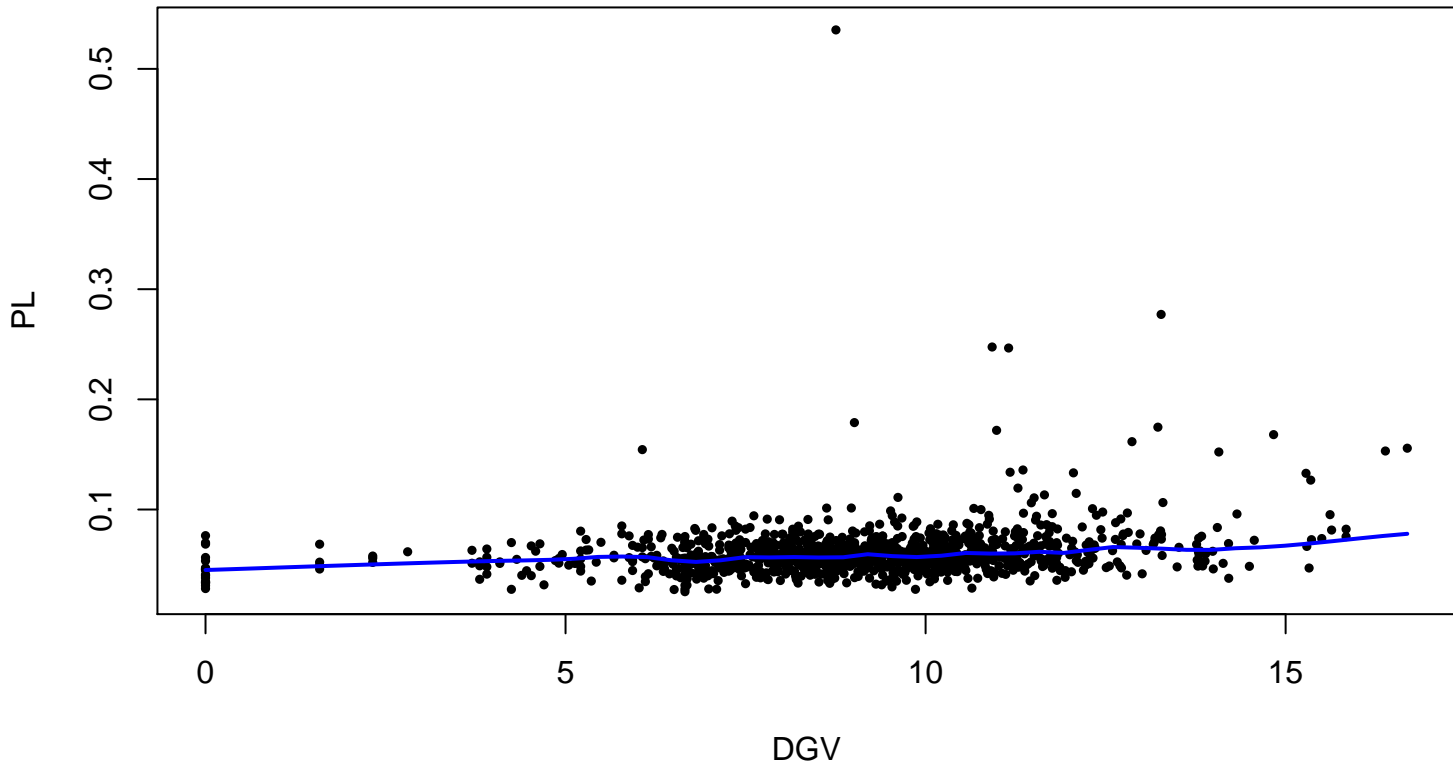



# Chr19

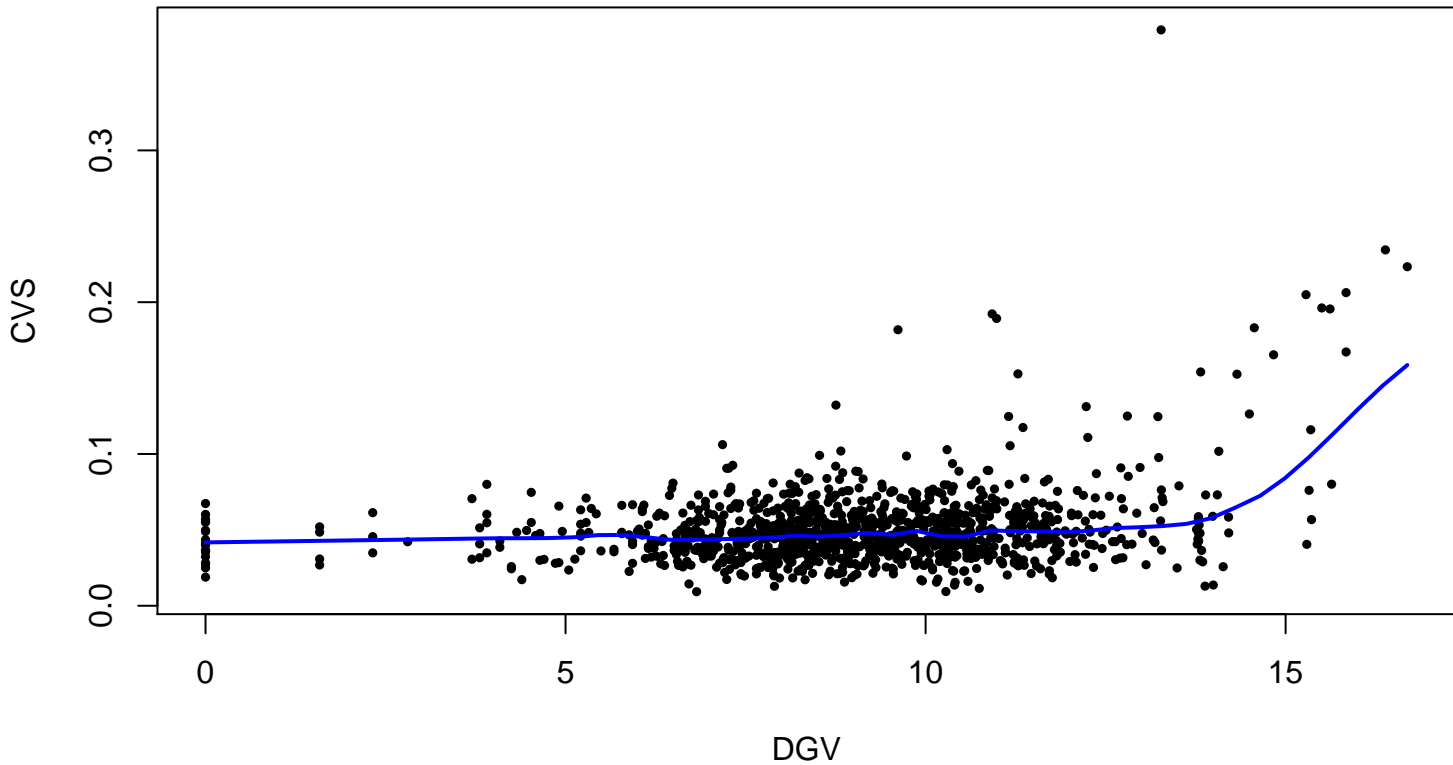

# Chr20

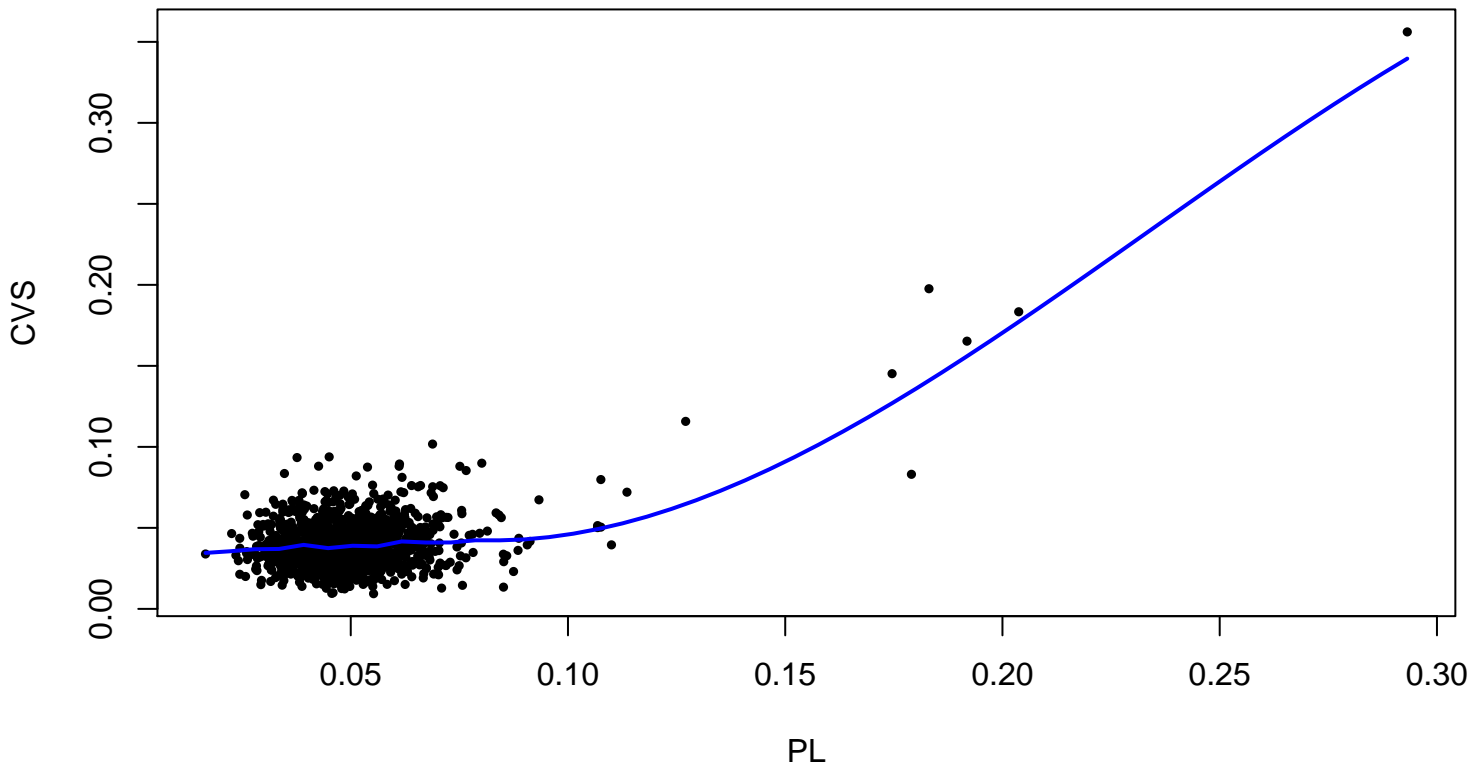

# Chr20

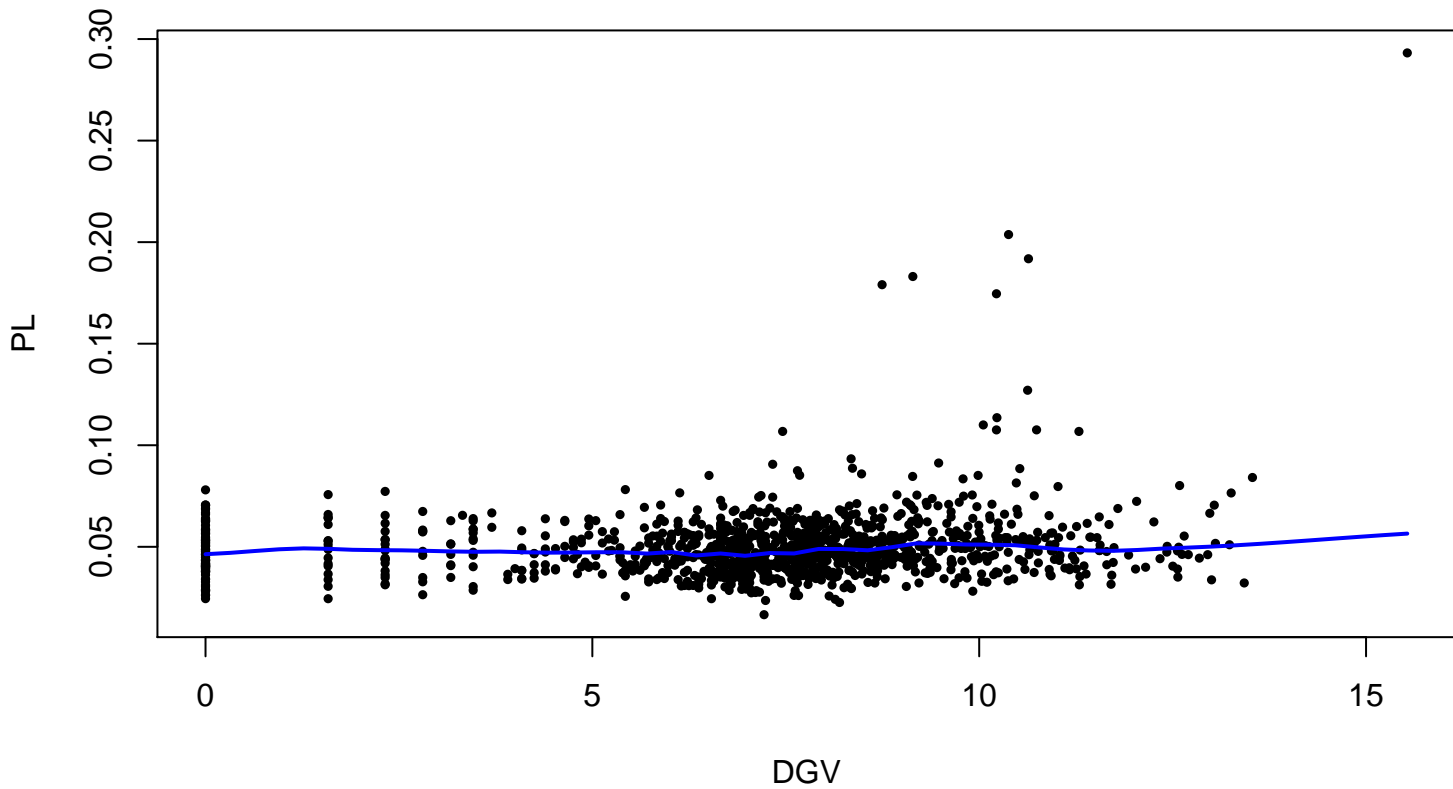

# Chr20

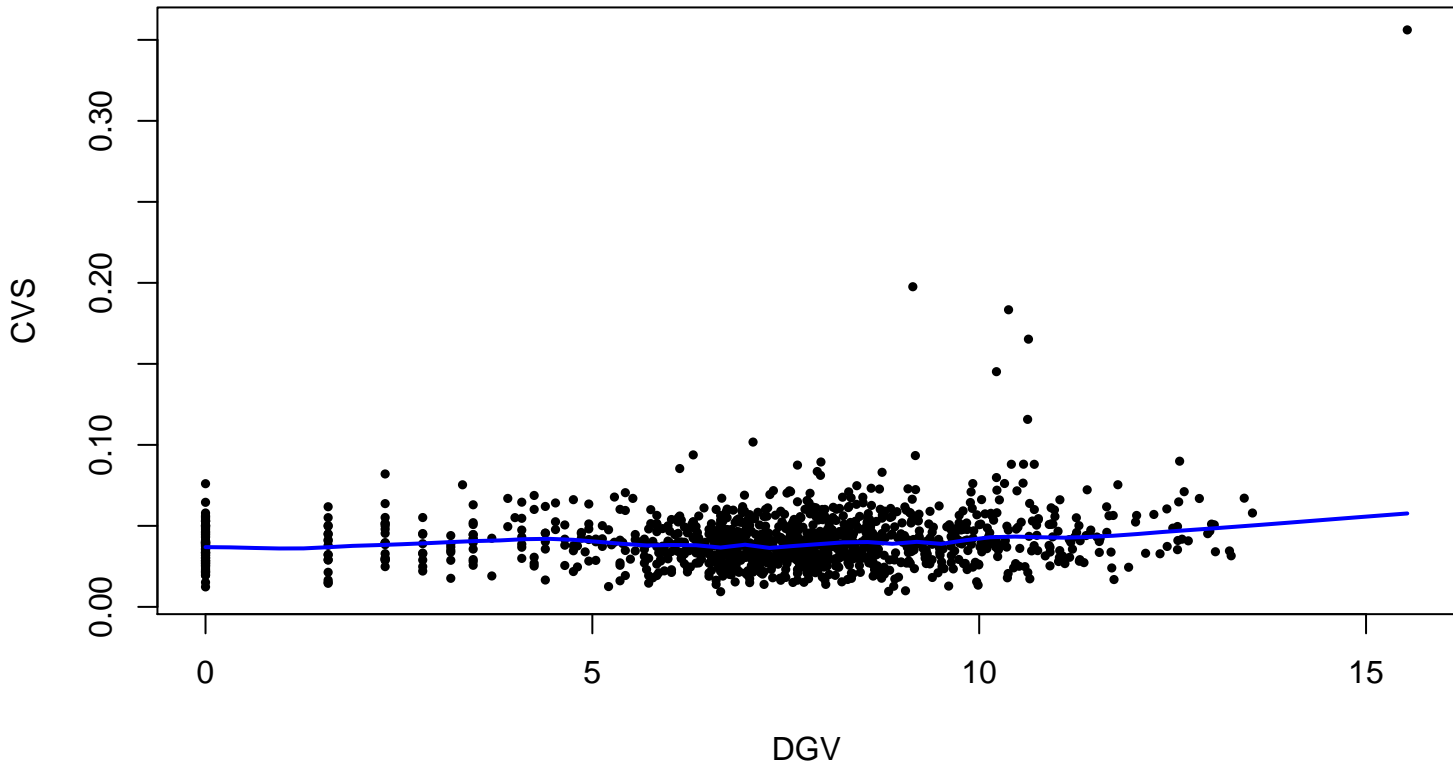

# Chr21

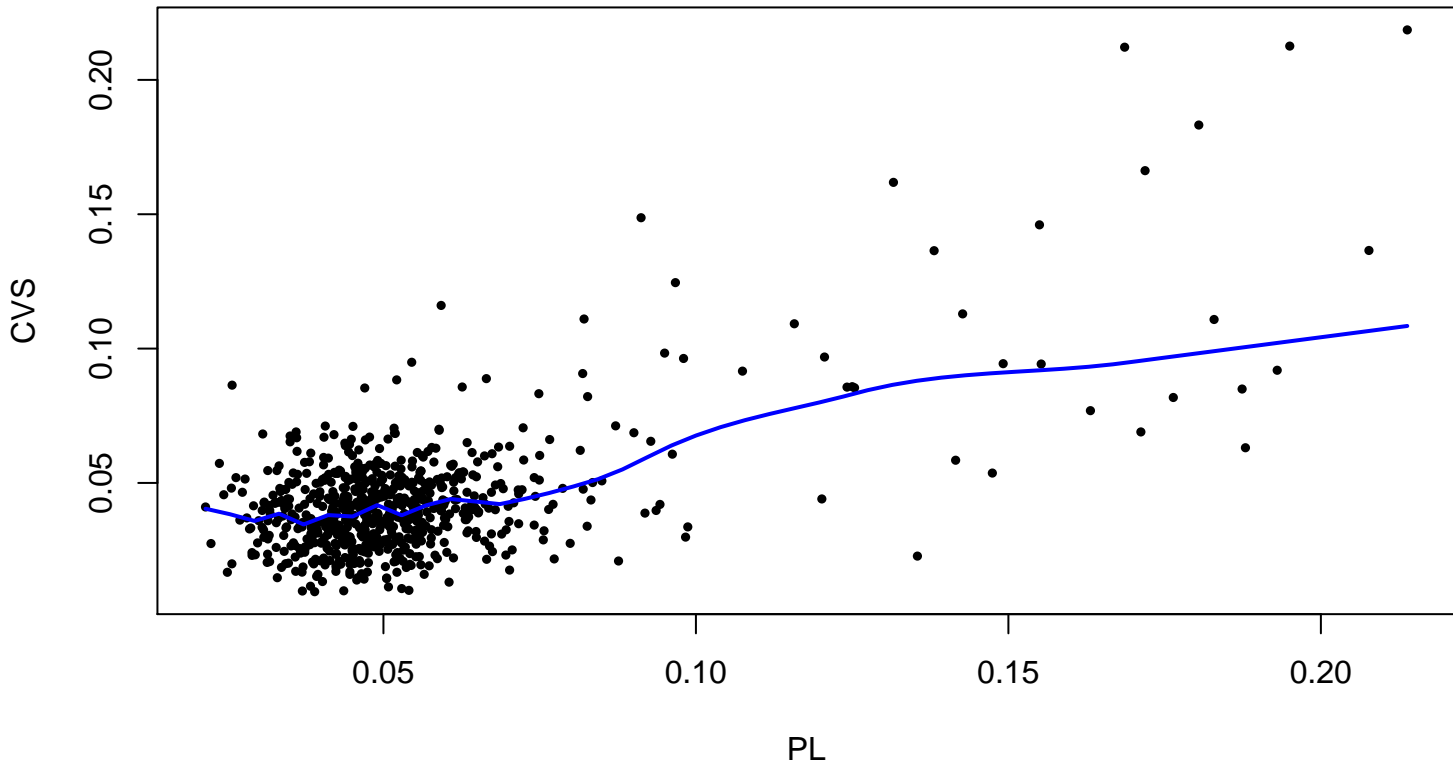

# Chr21

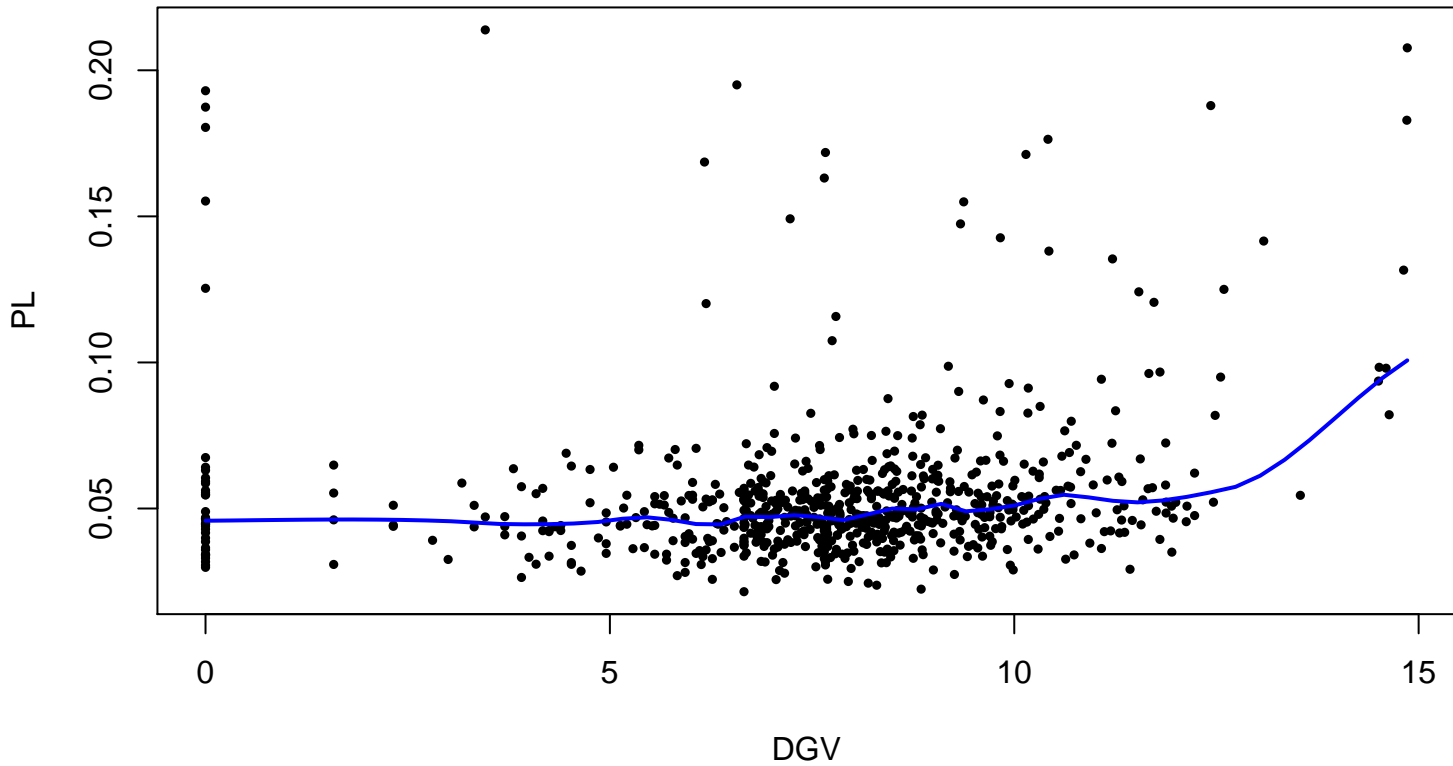

# Chr21

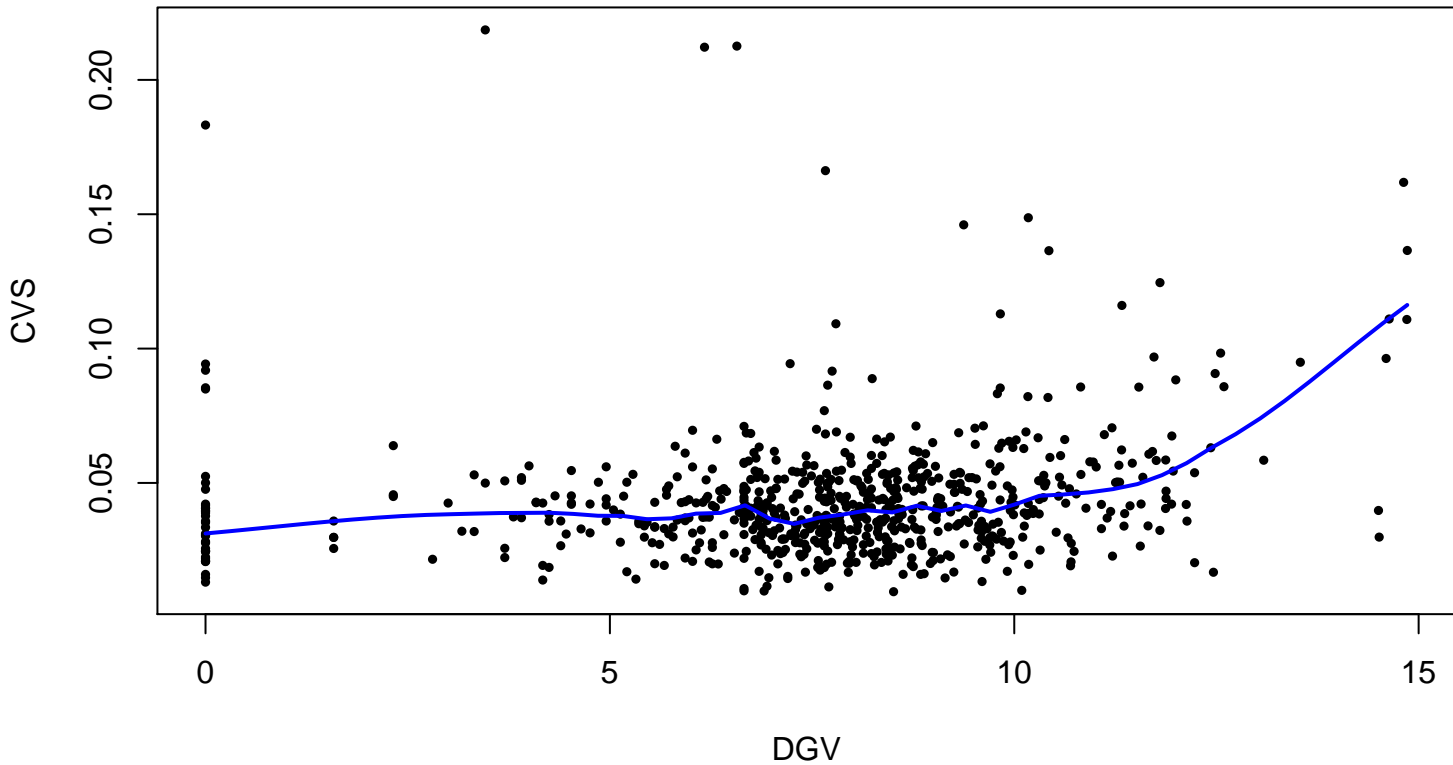

# Chr22

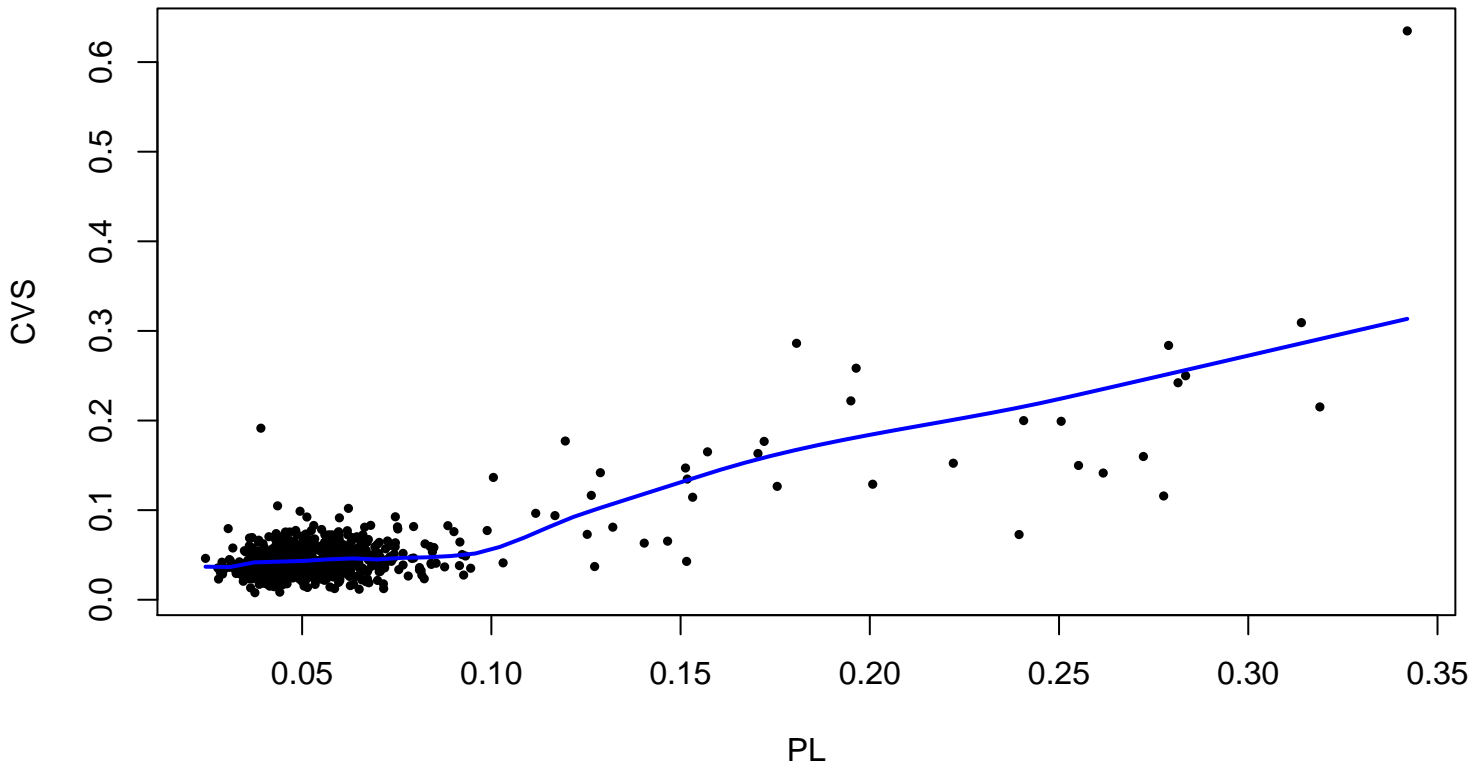



# Chr22

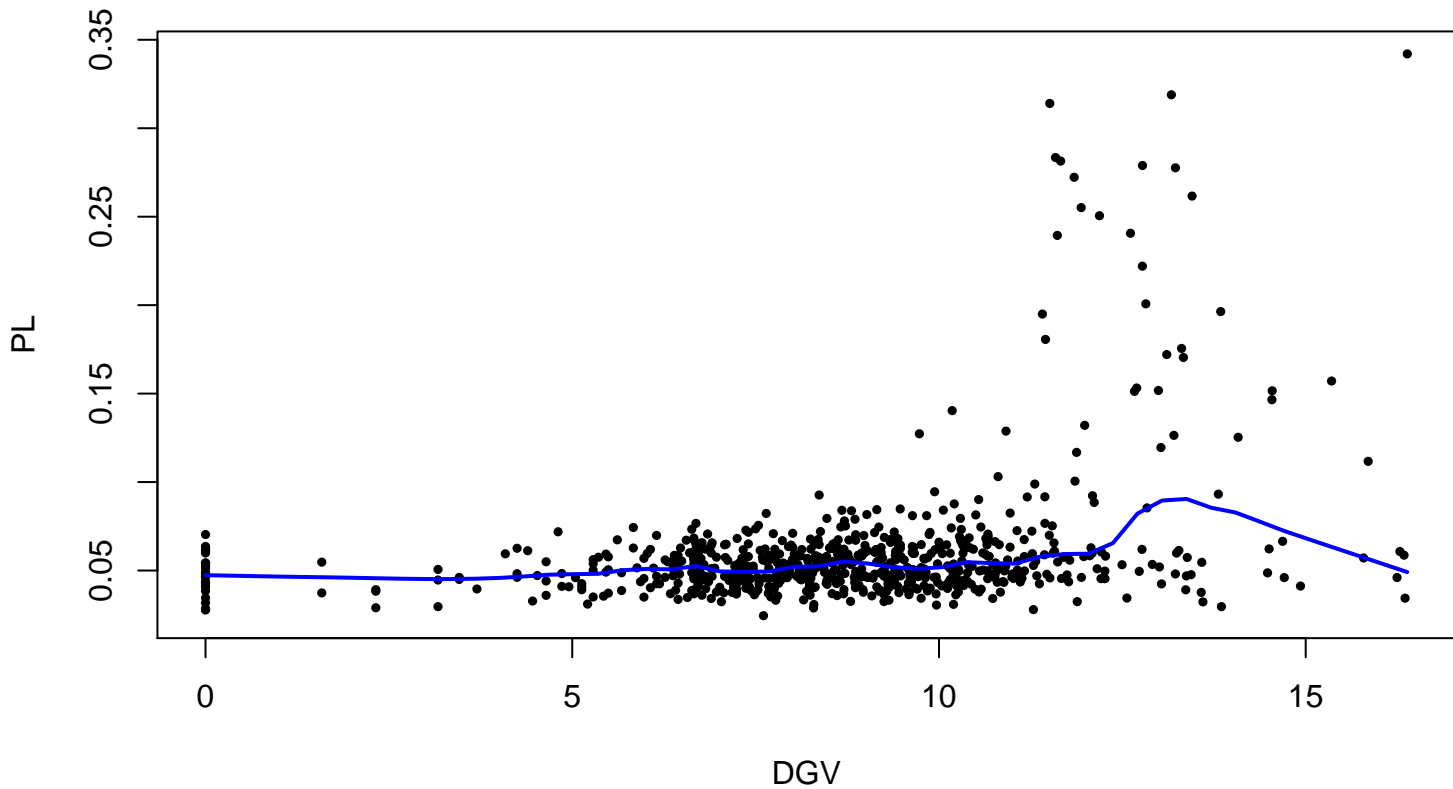

# Chr22

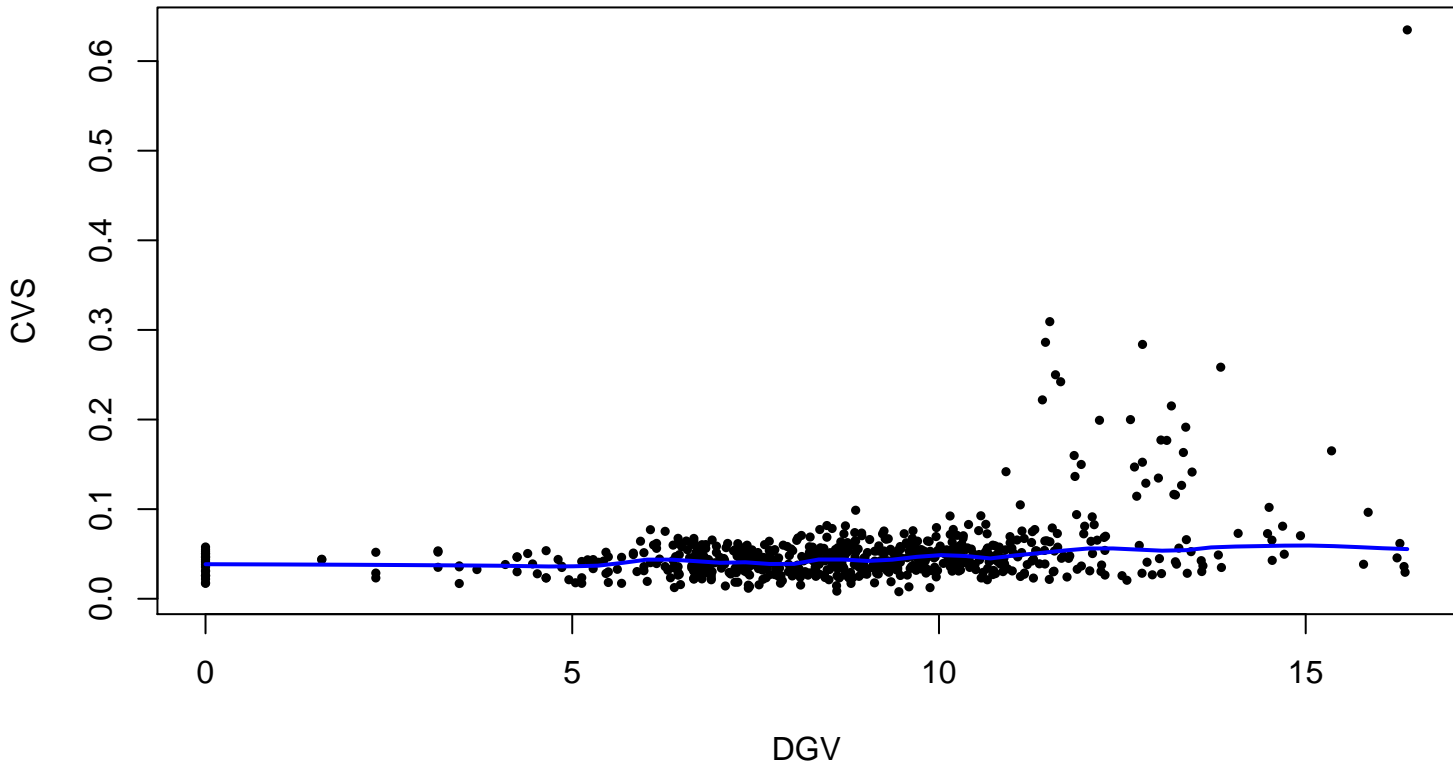

Supplement: pone.0153182.s002.pdf [file pone.0153182.s002.pdf]
